# Supplementary material
Source: PubMed Central journal article supplement (PMC4023768)
Supplement: AAC.01605-13_zac003142687so1.pdf [file AAC.01605-13_zac003142687so1.pdf]

## Supplemental Information

### Supplemental Figure Legends

**Supplemental Figure 1.** Phylogenetic analysis of the partial *rpoB* nucleotide sequence (512 bp) constructed using the neighbor-joining method and Jukes-Cantor model with 1,000 bootstrap replications. The scale bar designates the evolutionary distance of 0.005 nucleotide substitutions per site. The accession numbers are indicated for sequences that were generated in a previous study (1) or were obtained from publicly available genomes that are listed in Supplemental Table 2.

**Supplemental Figure 2.** Phylogenetic analysis of the plasmid-encoded FOX-10 amino acid sequence from *Klebsiella* sp. 10982. The phylogeny was constructed with the neighbor-joining method and the p-distance model with 1,000 bootstrap replications. Only bootstrap values  $\geq 50$  are displayed. The scale bar designates the evolutionary distance of 0.05 amino acid substitutions per site. The FOX variants used in the phylogeny were those designated by the Lahey Clinic and are available on their website (<http://www.lahey.org/Studies/>). GenBank accession numbers are shown.

**Supplemental Figure 3.** Phylogenetic analysis of the LEN-26 amino acid sequence from *Klebsiella* sp. 10982. The phylogeny was constructed using MEGA5 (2) with the neighbor-joining method and the p-distance model with 1,000 bootstrap replications. Only bootstrap values  $\geq 50$  are shown. The scale bar designates the evolutionary distance of 0.01 amino acid substitutions per site. Accession numbers are shown for sequences from GenBank, while unpublished sequences that have been included in this phylogeny are available on the Institut Pasteur website (<http://www.pasteur.fr/ip/easysite/pasteur/en/research/plates-formes-technologiques/pasteur-genopole-ile-de-france/genotyping-of-pathogens-and-public-health-pf8/beta-lactamase-enzyme-variants/beta-lactamase-enzyme-variants>).

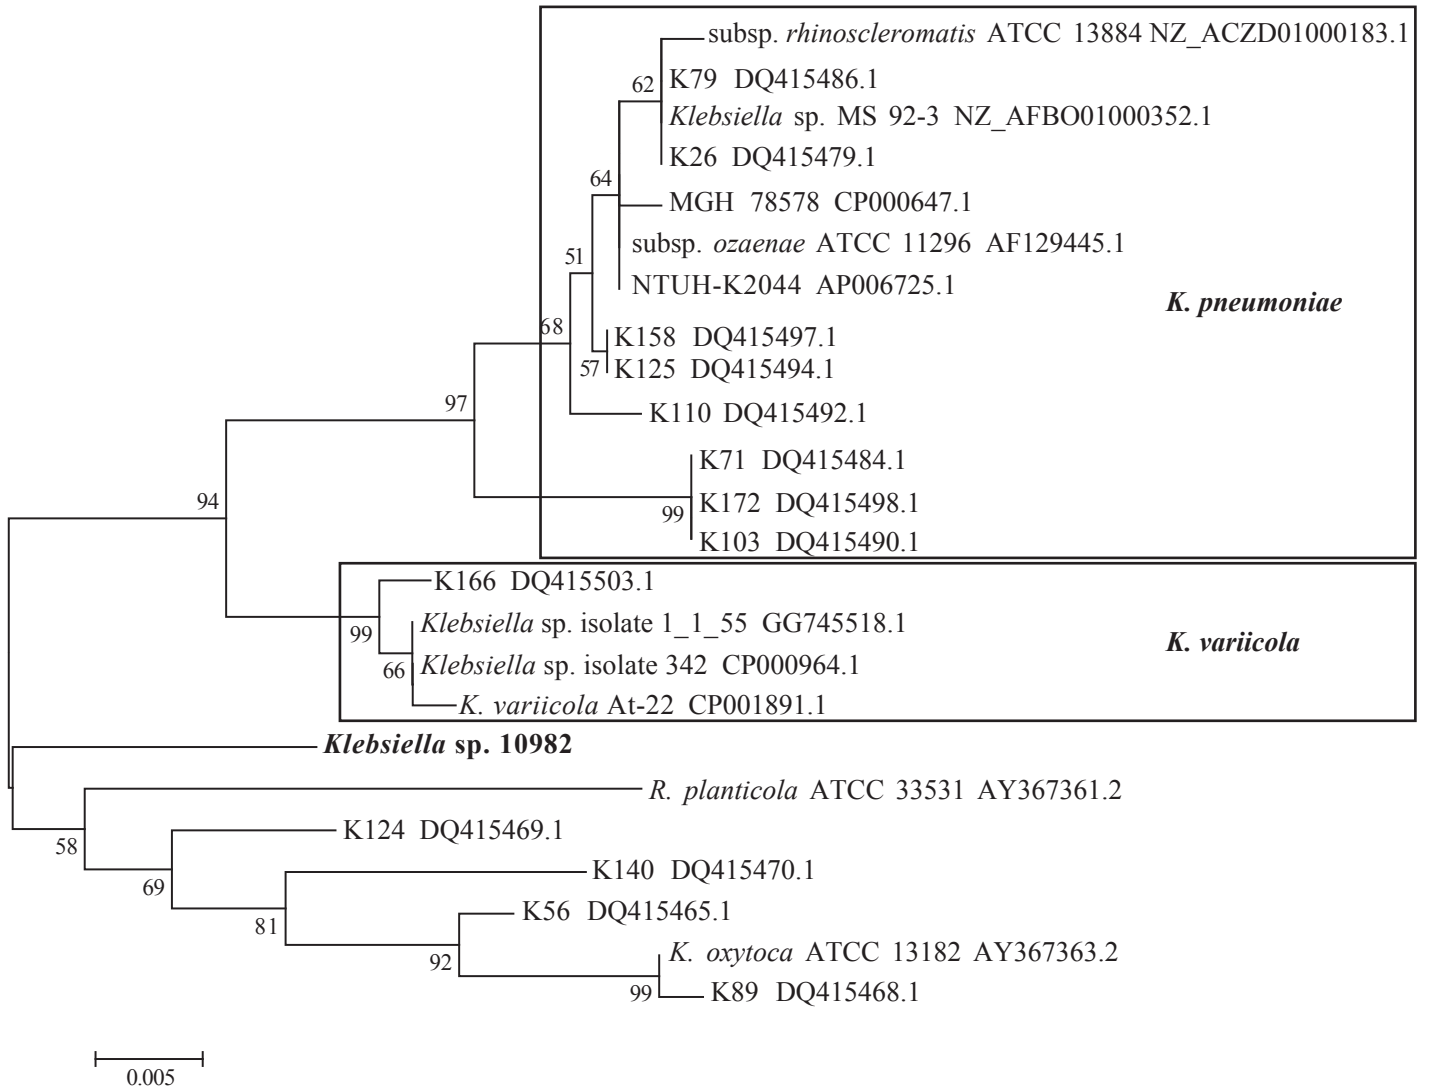

**Supplemental Figure 1.**

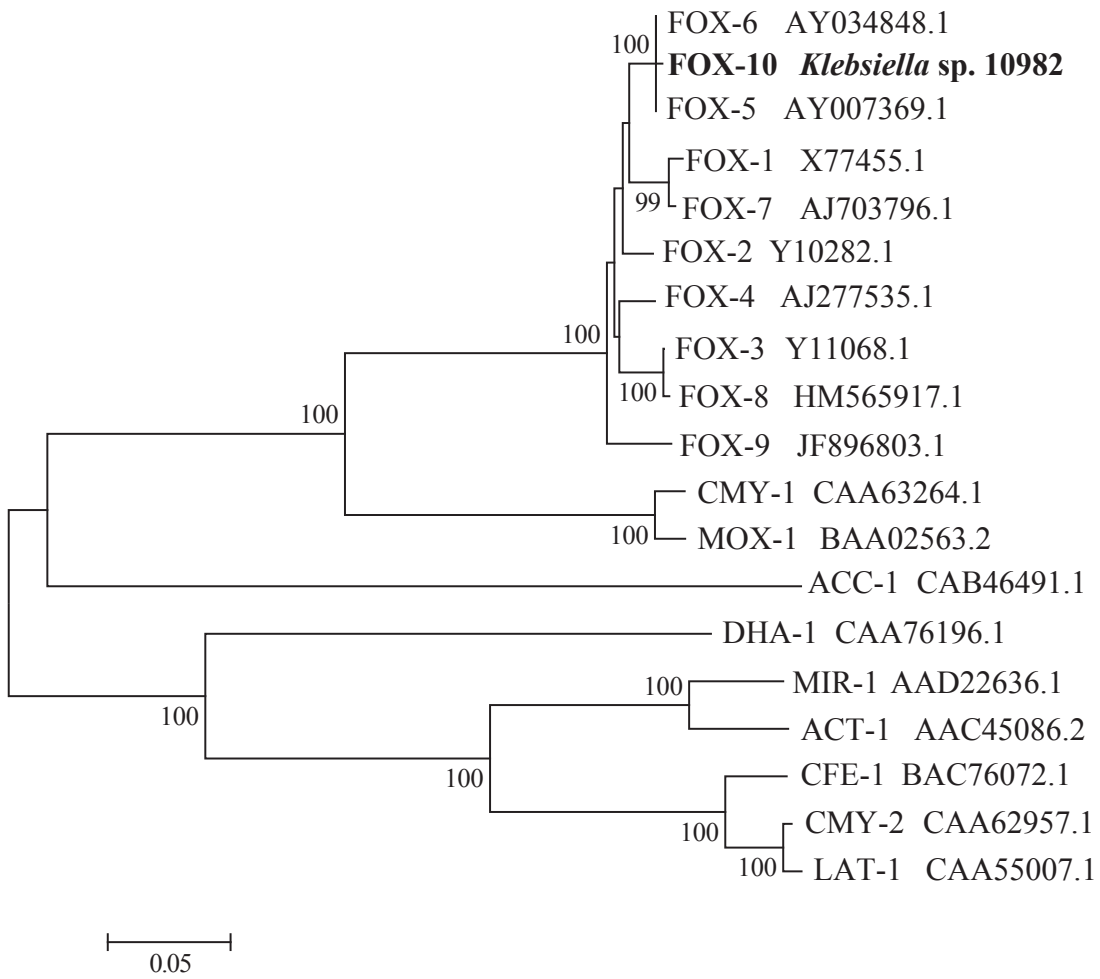

Supplemental Figure 2.

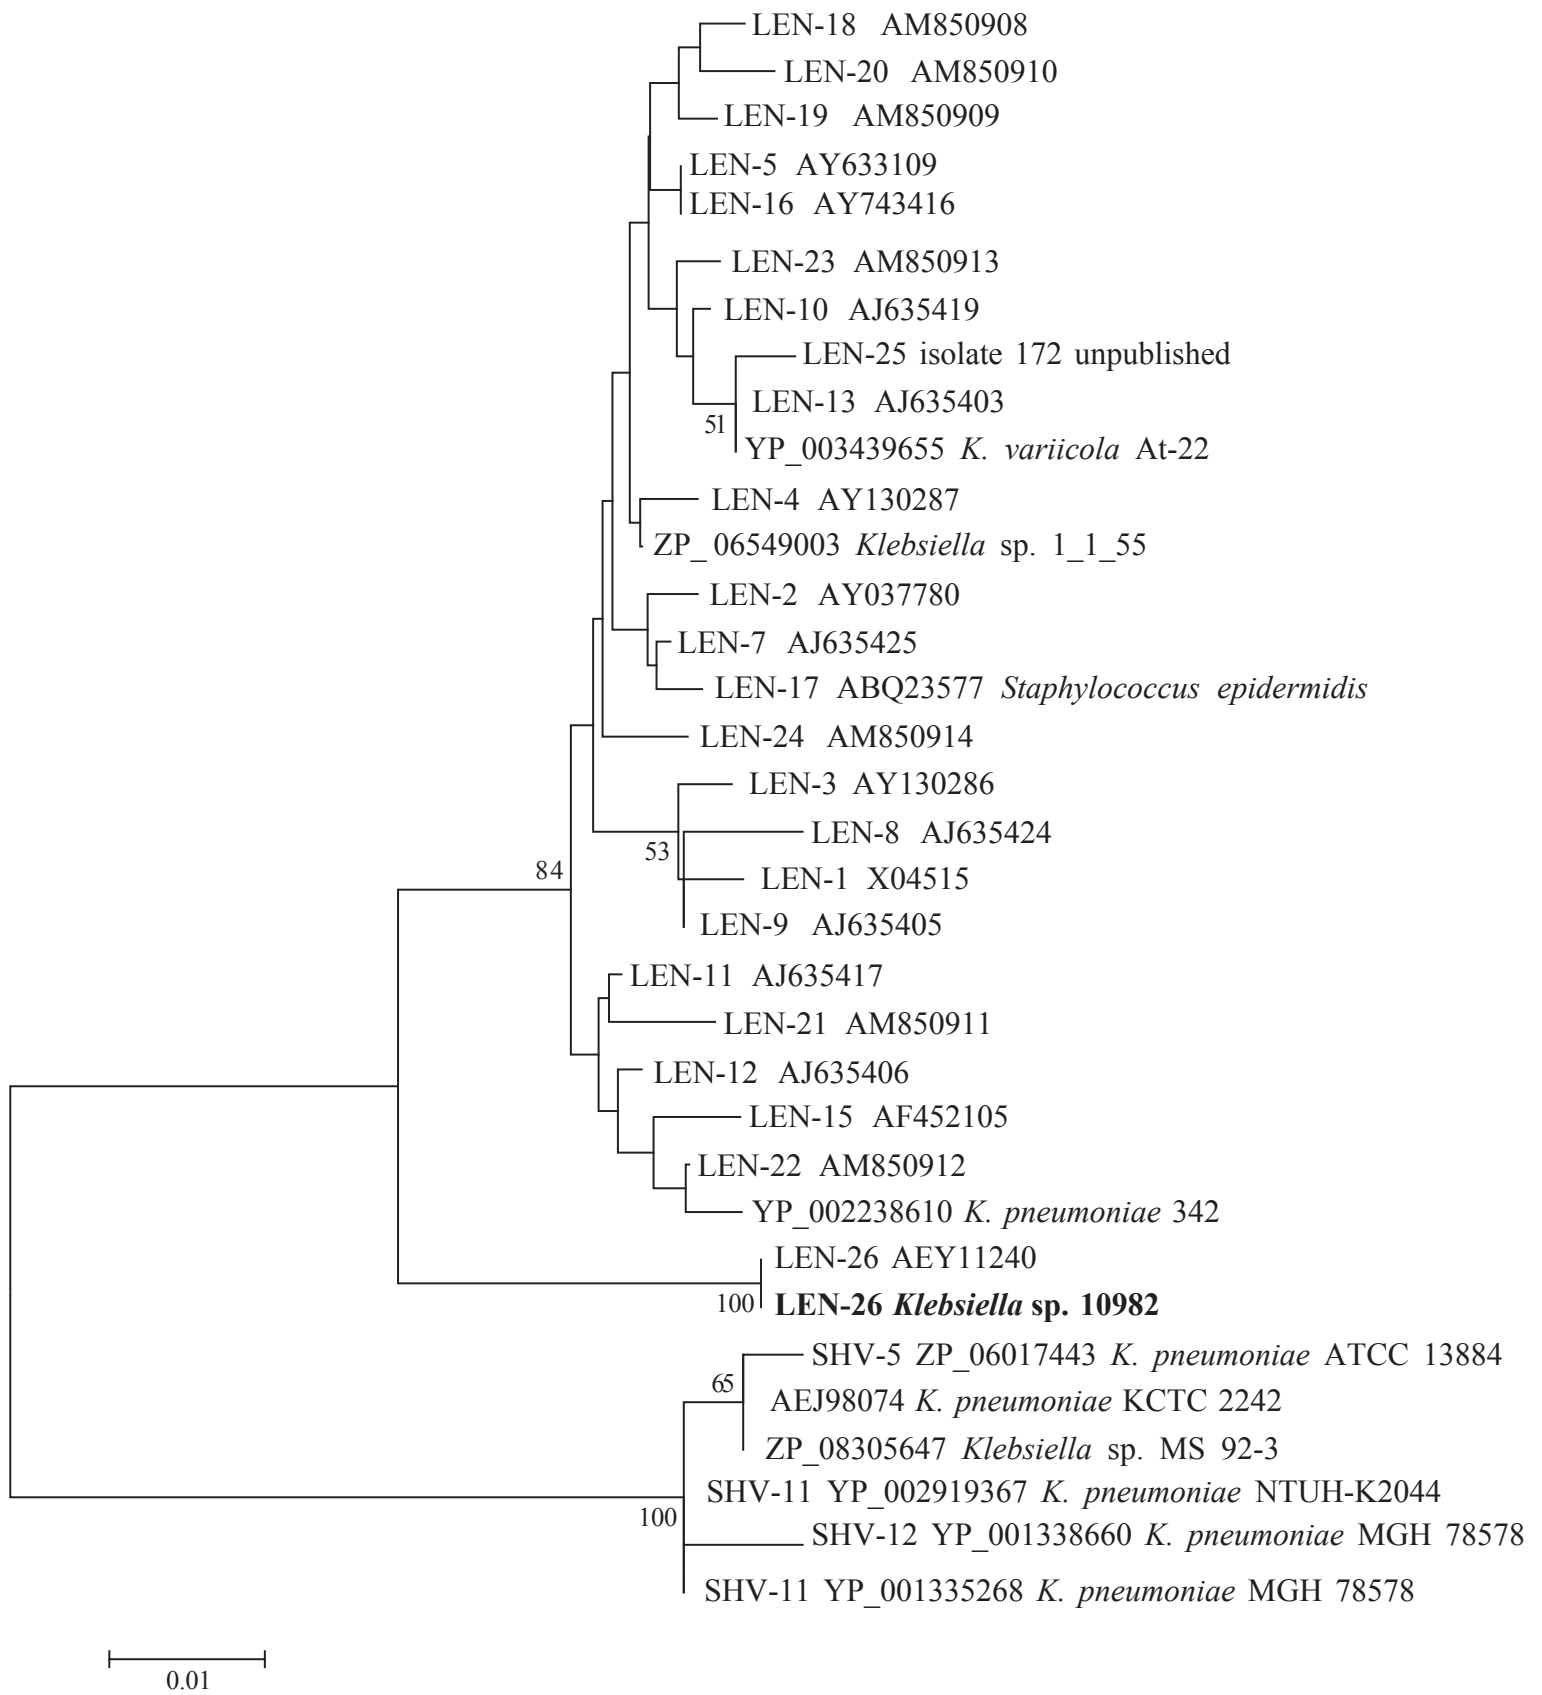

Supplemental Figure 3.

**Supplemental Table 1.** Primers used in this study

| Primer     | Sequence (5'-3')          | Annealing Temperature | Amplicon size (bp) | Source     |
|------------|---------------------------|-----------------------|--------------------|------------|
| SHVS-F     | GCCGGGTTATTCTTATTTGTCGC   | 58                    | 992                | (3)        |
| SHVS-R     | TCTTTCCGATGCCGCCGCCAGTCA  |                       |                    | "          |
| FOX_F      | CAATTCATTCACCACGAGAATA    | 52                    | 1203               | This study |
| FOX_R      | AATGTGGACGCCTTGA ACT      |                       |                    | "          |
| FOX5-A     | ATGCAACAACGGCGTGCGTTC     | 56                    | 1149               | (4)        |
| FOX5-B     | TCACTCGGCCAACTGACTCAG     |                       |                    | "          |
| A/C FW     | GAGAACCAAAGACAAAGACCTGGA  | 56                    | 465                | (5, 6)     |
| A/C RV     | ACGACAAACCTGAATTGCCTCCTT  |                       |                    | "          |
| allB_115F  | GAGGCGAGGCAGGTCATGGA      | 58                    | 1027               | This study |
| allB_1142R | GCAATGCGGCCCTTATGCTTCAG   |                       |                    | "          |
| citC2_203F | AGGGAGAAGGGCTGAGCCTGA     | 58                    | 743                | "          |
| citC2_946R | AGTTGCGCTGCCGGTAAAGCT     |                       |                    | "          |
| nifH_54F   | CACCACCCAGAATCTCGTCGCG    | 58                    | 674                | "          |
| nifH_728R  | TGACGATATTCGTTGGCCTGCTGAC |                       |                    | "          |

The FOX and LEN genes of *Klebsiella* sp. 10982 were PCR amplified for sequencing using

GoTaq polymerase (Promega) in a 50 µl reaction with the following concentrations of reagents:

1X Buffer, 2-2.5 mM MgCl<sub>2</sub>, 0.2-0.4 µM of each primer, and 1U of Taq. The PCR for the

allantoin and citrate synthesis gene were performed using AmpliTaq Gold 360 polymerase (Life Technologies). The PCR reaction was performed using the following final concentrations of

reagents: 1X Buffer, 2 mM MgCl<sub>2</sub>, 0.2 mM dNTPs, 0.2 µM of each primer, and 1.25 U of Taq,

in a 15 µl final reaction volume. The PCR protocol included an initial denaturation at 95°C,

followed by 30 cycles of 95°C for 30s, 58°C for 30s, and an elongation of 72°C for 1m, and a final extension at 72°C for 7m.

**Supplemental Table 2.** Genomes analyzed in this study

| Organism                                               | Strain Id  | Isolate Source                          | Accession Number | Reference   |
|--------------------------------------------------------|------------|-----------------------------------------|------------------|-------------|
| <i>K. pneumoniae</i>                                   | MGH 78578  | human sputum                            | NC_009648.1      | unpublished |
| <i>K. pneumoniae</i>                                   | 1162281    | unknown                                 | AFQL00000000.1   | (7)         |
| <i>K. pneumoniae</i>                                   | NTUH-K2044 | human blood                             | NC_012731.1      | (8)         |
| <i>K. pneumoniae</i>                                   | JH1        | unknown                                 | AFQK00000000.1   | (7)         |
| <i>K. pneumoniae</i>                                   | KCTC 2242  | unknown                                 | NC_017540.1      | (9)         |
| <i>K. pneumoniae</i>                                   | 1191100241 | unknown                                 | AFXH00000000.1   | unpublished |
| <i>K. pneumoniae</i>                                   | MS 92-3    | unknown                                 | AFBO00000000.1   | unpublished |
| <i>K. pneumoniae</i> subsp.<br><i>rhinoscleromatis</i> | ATCC 13884 | human airway sample                     | ACZD00000000.1   | unpublished |
| <i>Klebsiella</i> sp.                                  | 10982      | human perianal swab                     | AKYX00000000.1   | This study  |
| <i>Klebsiella</i> sp.                                  | 342        | stem tissue of maize plant              | NC_011283.1      | (10)        |
| <i>Klebsiella</i> sp.                                  | 1_1_55     | human gastrointestinal tract            | ACXA00000000.1   | unpublished |
| <i>K. variicola</i>                                    | At-22      | <i>Atta cephalotes</i> fungus<br>garden | CP001891.1       | (11)        |
| <i>E. aerogenes</i>                                    | KCTC 2190  | human specimen                          | NC_015663.1      | (12)        |
| <i>E. lignolyticus</i>                                 | SCF1       | rainforest soil                         | NC_014618.1      | (13, 14)    |

1. **Alves MS, Dias RC, de Castro AC, Riley LW, Moreira BM.** 2006. Identification of clinical isolates of indole-positive and indole-negative *Klebsiella* spp. J Clin Microbiol **44**:3640-3646.
2. **Tamura K, Peterson D, Peterson N, Stecher G, Nei M, Kumar S.** 2011. MEGA5: molecular evolutionary genetics analysis using maximum likelihood, evolutionary distance, and maximum parsimony methods. Mol Biol Evol **28**:2731-2739.
3. **Nuesch-Inderbilen MT, Hachler H, Kayser FH.** 1996. Detection of genes coding for extended-spectrum SHV beta-lactamases in clinical isolates by a molecular genetic method, and comparison with the E test. Eur J Clin Microbiol Infect Dis **15**:398-402.
4. **Rodriguez-Martinez JM, Velasco C, Garcia I, Cano ME, Martinez-Martinez L, Pascual A.** 2007. Characterisation of integrons containing the plasmid-mediated quinolone resistance gene qnrA1 in *Klebsiella pneumoniae*. Int J Antimicrob Agents **29**:705-709.
5. **Johnson TJ, Wannemuehler YM, Johnson SJ, Logue CM, White DG, Doetkott C, Nolan LK.** 2007. Plasmid replicon typing of commensal and pathogenic *Escherichia coli* isolates. Appl Environ Microbiol **73**:1976-1983.
6. **Carattoli A, Bertini A, Villa L, Falbo V, Hopkins KL, Threlfall EJ.** 2005. Identification of plasmids by PCR-based replicon typing. J Microbiol Methods **63**:219-228.
7. **Kumar V, Sun P, Vamathevan J, Li Y, Ingraham K, Palmer L, Huang J, Brown JR.** 2011. Comparative genomics of *Klebsiella pneumoniae* strains with different antibiotic resistance profiles. Antimicrob Agents Chemother **55**:4267-4276.
8. **Wu KM, Li LH, Yan JJ, Tsao N, Liao TL, Tsai HC, Fung CP, Chen HJ, Liu YM, Wang JT, Fang CT, Chang SC, Shu HY, Liu TT, Chen YT, Shiau YR, Lauderdale TL, Su IJ, Kirby R, Tsai SF.** 2009. Genome sequencing and comparative analysis of *Klebsiella pneumoniae* NTUH-K2044, a strain causing liver abscess and meningitis. J Bacteriol **191**:4492-4501.
9. **Shin SH, Kim S, Kim JY, Lee S, Um Y, Oh MK, Kim YR, Lee J, Yang KS.** 2012. Complete genome sequence of the 2,3-butanediol-producing *Klebsiella pneumoniae* strain KCTC 2242. J. Bacteriol. **194**:2736-2737.
10. **Fouts DE, Tyler HL, DeBoy RT, Daugherty S, Ren Q, Badger JH, Durkin AS, Huot H, Shrivastava S, Kothari S, Dodson RJ, Mohamoud Y, Khouri H, Roesch LF, Krogfelt KA, Struve C, Triplett EW, Methe BA.** 2008. Complete genome sequence of the N<sub>2</sub>-fixing broad host range endophyte *Klebsiella pneumoniae* 342 and virulence predictions verified in mice. PLoS Genet. **4**:e1000141.
11. **Pinto-Tomas AA, Anderson MA, Suen G, Stevenson DM, Chu FS, Cleland WW, Weimer PJ, Currie CR.** 2009. Symbiotic nitrogen fixation in the fungus gardens of leaf-cutter ants. Science **326**:1120-1123.
12. **Shin SH, Kim S, Kim JY, Lee S, Um Y, Oh MK, Kim YR, Lee J, Yang KS.** 2012. Complete genome sequence of *Enterobacter aerogenes* KCTC 2190. J. Bacteriol. **194**:2373-2374.
13. **Deangelis KM, D'Haeseleer P, Chivian D, Fortney JL, Khudyakov J, Simmons B, Woo H, Arkin AP, Davenport KW, Goodwin L, Chen A, Ivanova N, Kyrpides NC, Mavromatis K, Woyke T, Hazen TC.** 2011. Complete genome sequence of "*Enterobacter lignolyticus*" SCF1. Stand. Genomic Sci. **5**:69-85.



14. **Khudyakov JI, D'Haeseleer P, Borglin SE, Deangelis KM, Woo H, Lindquist EA, Hazen TC, Simmons BA, Thelen MP.** 2012. Global transcriptome response to ionic liquid by a tropical rain forest soil bacterium, *Enterobacter lignolyticus*. Proc. Natl. Acad. Sci. USA.

Supplemental Table 3. Predicted protein-encoding genes that are unique or shared for the genome of *Klebsiella* sp. 10982 compared to the *K. variicola* and *K. pneumoniae* genomes

| Predicted Protein <sup>a</sup>                                                                                                  | Best KEGG match <sup>b</sup> | <i>K. variicola</i> | 10982 | <i>K. pneumoniae</i> |
|---------------------------------------------------------------------------------------------------------------------------------|------------------------------|---------------------|-------|----------------------|
| DNA-binding protein ; K07727 putative transcriptional regulator                                                                 | kpe:KPK_2699                 | +                   | -     | -                    |
| transcriptional regulator, LysR family                                                                                          | kpe:KPK_2822                 | +                   | -     | -                    |
| protein UmuD homolog ; K03503 DNA polymerase V [EC:3.4.21.-]                                                                    | kpe:KPK_3299                 | +                   | -     | -                    |
| hypothetical protein                                                                                                            | kpe:KPK_3528                 | +                   | -     | -                    |
| hypothetical protein                                                                                                            | kpu:KPI_2621                 | +                   | -     | -                    |
| peptide ABC transporter, periplasmic peptide-binding protein ; K02035 peptide/nickel transport system substrate-binding protein | kpe:KPK_2655                 | +                   | -     | -                    |
| hypothetical protein                                                                                                            | kpe:KPK_1197                 | +                   | -     | -                    |
| hypothetical protein                                                                                                            | kpe:KPK_1526                 | +                   | -     | -                    |
| hypothetical protein                                                                                                            | ptm:GSPATT00024139001        | +                   | -     | -                    |
| hypothetical protein                                                                                                            | kpu:KPI_2728                 | +                   | -     | -                    |
| hypothetical protein                                                                                                            | kpe:KPK_5546                 | +                   | -     | -                    |
| hypothetical protein                                                                                                            | kpe:KPK_4499                 | +                   | -     | -                    |
| hypothetical protein                                                                                                            | kpe:KPK_3790                 | +                   | -     | -                    |
| hypothetical protein                                                                                                            | tet:THERM_00777240           | +                   | -     | -                    |
| hypothetical protein                                                                                                            | kpe:KPK_0105                 | +                   | -     | -                    |
| hypothetical protein                                                                                                            | kpe:KPK_1847                 | +                   | -     | -                    |
| hypothetical protein                                                                                                            | kpe:KPK_4415                 | +                   | -     | -                    |
| hypothetical protein                                                                                                            | kpu:KPI_3534                 | +                   | -     | -                    |
| hypothetical protein                                                                                                            | xom:XOO_1656                 | +                   | -     | -                    |
| formate dehydrogenase, alpha subunit ; K00123 formate dehydrogenase, alpha subunit [EC:1.2.1.2]                                 | dvm:DvMF_0643                | +                   | -     | -                    |
| hypothetical protein                                                                                                            | kpe:KPK_2112                 | +                   | -     | -                    |
| hypothetical protein                                                                                                            | kpe:KPK_3796                 | +                   | -     | -                    |
| hypothetical protein                                                                                                            | kpe:KPK_2394                 | +                   | -     | -                    |
| tufB; elongation factor Tu                                                                                                      | kpu:KPI_5049                 | +                   | -     | -                    |
| hypothetical protein                                                                                                            | kpe:KPK_2487                 | +                   | -     | -                    |
| hypothetical protein                                                                                                            | kpe:KPK_3190                 | +                   | -     | -                    |
| AraC family transcriptional regulator                                                                                           | reu:Reut_B4713               | +                   | -     | -                    |
| hypothetical protein                                                                                                            | kpe:KPK_2923                 | +                   | -     | -                    |
| putative DNA processing protein DprA ; K04096 DNA processing protein                                                            | cps:CPS_0022                 | +                   | -     | -                    |
| hypothetical protein                                                                                                            | kpe:KPK_3275                 | +                   | -     | -                    |
| hypothetical protein                                                                                                            | kpe:KPK_0821                 | +                   | -     | -                    |
| GK16620 gene product from transcript GK16620-RA                                                                                 | dwi:DwiL_GK16620             | +                   | -     | -                    |
| MUT6; DEAH-box RNA helicase ; K12815 pre-mRNA-splicing factor ATP-dependent RNA helicase PRP16 [EC:3.6.1.-]                     | cre:CHLREDRAFT_132956        | +                   | -     | -                    |
| putative sulfonate ABC transporter, permease protein ; K02050 sulfonate/nitrate/taurine transport system permease protein       | kpe:KPK_3095                 | +                   | -     | -                    |
| hypothetical protein                                                                                                            | kpe:KPK_3742                 | +                   | -     | -                    |
| hypothetical protein                                                                                                            | ter:507711.70                | +                   | -     | -                    |
| hypothetical protein                                                                                                            | kpe:KPK_2526                 | +                   | -     | -                    |
| hypothetical protein                                                                                                            | pyo:PY02327                  | +                   | -     | -                    |
| sec7 domain-containing protein (EC:3.2.1.52)                                                                                    | tgo:TGME49_028650            | +                   | -     | -                    |
| putative lipoprotein                                                                                                            | kpe:KPK_3328                 | +                   | -     | -                    |
| hypothetical protein                                                                                                            | kpe:KPK_3631                 | +                   | -     | -                    |
| type I secretion outer membrane protein, TolC                                                                                   | rpd:RPD_1907                 | +                   | -     | -                    |
| hypothetical protein                                                                                                            | kpe:KPK_0858                 | +                   | -     | -                    |
| hypothetical protein                                                                                                            | kpe:KPK_0875                 | +                   | -     | -                    |
| (p)ppGpp synthetase I, SpoT/RelA (EC:2.7.6.5); K01139 guanosine-3',5'-bis(diphosphate) 3'-pyrophosphohydrolase [EC:3.1.7.2]     | oan:Oant_2636                | +                   | -     | -                    |
| hypothetical protein                                                                                                            | kpe:KPK_5243                 | +                   | -     | -                    |
| hypothetical protein                                                                                                            | kpe:KPK_2377                 | +                   | -     | -                    |
| S1 RNA binding domain protein ; K06959                                                                                          | kpe:KPK_0339                 | +                   | -     | -                    |
| hypothetical protein                                                                                                            | kpe:KPK_0913                 | +                   | -     | -                    |
| 3-beta hydroxysteroid dehydrogenase/isomerase family protein                                                                    | kpe:KPK_3122                 | +                   | -     | -                    |
| hypothetical protein                                                                                                            | kpe:KPK_3298                 | +                   | -     | -                    |
| DNAJB1; DnaJ (Hsp40) homolog, subfamily B, member 1; K09507 DnaJ homolog subfamily B member 1                                   | btA:538426                   | +                   | -     | -                    |
| hypothetical protein                                                                                                            | cko:CKO_02430                | +                   | -     | -                    |
| hypothetical protein                                                                                                            | kpe:KPK_2559                 | +                   | -     | -                    |
| HdeB family protein                                                                                                             | kpe:KPK_0636                 | +                   | -     | -                    |
| hypothetical protein                                                                                                            | kpe:KPK_2887                 | +                   | -     | -                    |
| hypothetical protein                                                                                                            | kpe:KPK_3333                 | +                   | -     | -                    |
| hypothetical protein                                                                                                            | kpe:KPK_2592                 | +                   | -     | -                    |
| hypothetical protein                                                                                                            | kpu:KPI_1301                 | +                   | -     | -                    |
| hypothetical protein                                                                                                            | kpe:KPK_0397                 | +                   | -     | -                    |
| hypothetical protein                                                                                                            | kpe:KPK_3789                 | +                   | -     | -                    |
| hypothetical protein                                                                                                            | kpe:KPK_0740                 | +                   | -     | -                    |
| hypothetical protein                                                                                                            | kpu:KPI_0696                 | +                   | -     | -                    |
| conserved hypothetical protein                                                                                                  | pfl:PFHG_02195               | +                   | -     | -                    |
| hypothetical protein                                                                                                            | kpe:KPK_3282                 | +                   | -     | -                    |
| putative methylmalonyl-CoA mutase ; K01847 methylmalonyl-CoA mutase [EC:5.4.99.2]                                               | azc:AZC_1773                 | +                   | -     | -                    |
| hypothetical protein                                                                                                            | kpe:KPK_2517                 | +                   | -     | -                    |
| drug resistance MFS transporter, drug:H+ antiporter-1 (DHA2) family ; K03446 MFS transporter, DHA2 family, multidrug resistanc  | kpe:KPK_2659                 | +                   | -     | -                    |
| tnnt3a; troponin T3a, skeletal, fast                                                                                            | dre:58084                    | +                   | -     | -                    |
| hypothetical protein                                                                                                            | kpe:KPK_2377                 | +                   | -     | -                    |
| hypothetical protein                                                                                                            | kpe:KPK_2692                 | +                   | -     | -                    |
| hypothetical protein                                                                                                            | kpe:KPK_3295                 | +                   | -     | -                    |
| hypothetical protein                                                                                                            | kpe:KPK_0619                 | +                   | -     | -                    |
| hypothetical protein                                                                                                            | pcb:PC000411.02.0            | +                   | -     | -                    |
| hypothetical protein                                                                                                            | kpe:KPK_0822                 | +                   | -     | -                    |
| sbcB; exonuclease I; K01141 exodeoxyribonuclease I [EC:3.1.11.1]                                                                | kpn:KPN_02469                | +                   | -     | -                    |
| hypothetical protein                                                                                                            | kpe:KPK_3070                 | +                   | -     | -                    |
| hypothetical protein                                                                                                            | kpe:KPK_2515                 | +                   | -     | -                    |
| hypothetical protein                                                                                                            | kpe:KPK_2814                 | +                   | -     | -                    |
| hypothetical protein                                                                                                            | kpe:KPK_4086                 | +                   | -     | -                    |
| drug resistance MFS transporter, drug:H+ antiporter-1 (DHA2) family                                                             | kpe:KPK_3283                 | +                   | -     | -                    |
| hypothetical protein                                                                                                            | kpe:KPK_1674                 | +                   | -     | -                    |
| hypothetical protein                                                                                                            | kpe:KPK_4570                 | +                   | -     | -                    |
| hypothetical protein                                                                                                            | kpe:KPK_3304                 | +                   | -     | -                    |
| DNA polymerase III, delta prime subunit (EC:2.7.7.7); K02341 DNA polymerase III subunit delta' [EC:2.7.7.7]                     | mmw:Mmwy11_2266              | +                   | -     | -                    |
| hypothetical protein                                                                                                            | kpe:KPK_2560                 | +                   | -     | -                    |
| hypothetical protein                                                                                                            | kpe:KPK_2112                 | +                   | -     | -                    |

|                                                                                                                                     |               |   |   |   |
|-------------------------------------------------------------------------------------------------------------------------------------|---------------|---|---|---|
| hypothetical protein                                                                                                                | kpe:KPK_4293  | + | - | - |
| AMP-dependent synthetase and ligase ; K00666 fatty-acyl-CoA synthase [EC:6.2.1.-]                                                   | bph:Bphy_7172 | + | - | - |
| hypothetical protein                                                                                                                | kpe:KPK_1848  | + | - | - |
| hypothetical protein                                                                                                                | kpe:KPK_2190  | + | - | - |
| putative ABC transporter, substrate binding protein; K02035 peptide/nickel transport system substrate-binding protein               | bbt:BBta_4877 | + | - | - |
| hypothetical protein                                                                                                                | kpe:KPK_0640  | + | - | - |
| hypothetical protein                                                                                                                | kpe:KPK_0819  | + | - | - |
| hypothetical protein                                                                                                                | kpe:KPK_1468  | + | - | - |
| hypothetical protein LOC100266372                                                                                                   | vvi:100266372 | + | - | - |
| hypothetical protein                                                                                                                | kpe:KPK_1528  | + | - | - |
| hypothetical protein                                                                                                                | kpe:KPK_3581  | + | - | - |
| hypothetical protein                                                                                                                | kpe:KPK_3343  | + | - | - |
| hypothetical protein                                                                                                                | kpe:KPK_3816  | + | - | - |
| hypothetical protein                                                                                                                | kpe:KPK_0338  | + | - | - |
| adhesin/hemagglutinin                                                                                                               | pfl:PFL_0166  | + | - | - |
| hypothetical protein                                                                                                                | kpe:KPK_4262  | + | - | - |
| amidase ; K01426 amidase [EC:3.5.1.4]                                                                                               | kpe:KPK_2671  | + | - | - |
| hypothetical protein                                                                                                                | kpe:KPK_3718  | + | - | - |
| carbamoyl-phosphate synthase, small subunit                                                                                         | sde:Sde_2696  | + | - | - |
| hypothetical protein                                                                                                                | kpe:KPK_1860  | + | - | - |
| hypothetical protein                                                                                                                | kpe:KPK_2338  | + | - | - |
| hypothetical protein                                                                                                                | kpu:KPI_2471  | + | - | - |
| hypothetical protein                                                                                                                | kpe:KPK_1856  | + | - | - |
| hypothetical protein                                                                                                                | kpe:KPK_1554  | + | - | - |
| hypothetical protein                                                                                                                | kpe:KPK_2093  | + | - | - |
| hypothetical protein                                                                                                                | kpe:KPK_5469  | + | - | - |
| putative histidine ammonia-lyase ; K01745 histidine ammonia-lyase [EC:4.3.1.3]                                                      | kpe:KPK_3142  | + | - | - |
| cysteine desulfurase, SufS family ; K11717 cysteine desulfurase / selenocysteine lyase [EC:2.8.1.7 4.4.1.16]                        | kpe:KPK_1757  | + | - | - |
| FAD-binding lipoprotein                                                                                                             | kpe:KPK_2973  | + | - | - |
| hypothetical protein                                                                                                                | kpe:KPK_2678  | + | - | - |
| drug resistance MFS transporter, drug:H+ antiporter-1 (DHA2) family                                                                 | kpe:KPK_3283  | + | - | - |
| MmgE/PrpD family protein                                                                                                            | kpe:KPK_3102  | + | - | - |
| adenylosuccinate lyase ; K01756 adenylosuccinate lyase [EC:4.3.2.2]                                                                 | kpe:KPK_1826  | + | - | - |
| mgfB; magnesium-translocating P-type ATPase (EC:3.6.3.2); K01531 Mg <sup>2+</sup> -importing ATPase [EC:3.6.3.2]                    | kpe:KPK_3276  | + | - | - |
| MmgE/PrpD family protein                                                                                                            | kpe:KPK_1822  | + | - | - |
| putative symporter YagG                                                                                                             | kpe:KPK_0600  | + | - | - |
| sodium:citrate symporter family protein ; K11616 malate:Na <sup>+</sup> symporter                                                   | kpe:KPK_1918  | + | - | - |
| transporter, major facilitator family                                                                                               | kpe:KPK_1076  | + | - | - |
| ntaA; nitrotriacetate monooxygenase, component A (EC:1.14.13.-)                                                                     | kpe:KPK_1828  | + | - | - |
| transporter, major facilitator family                                                                                               | kpe:KPK_2037  | + | - | - |
| putative transporter                                                                                                                | kpe:KPK_5051  | + | - | - |
| protein UmuC homolog ; K03502 DNA polymerase V                                                                                      | kpe:KPK_3300  | + | - | - |
| putative sugar ABC transporter, periplasmic sugar-binding protein ; K02027 multiple sugar transport system substrate-binding prot   | kpe:KPK_2004  | + | - | - |
| aatB; aspartate transaminase (EC:2.6.1.1); K00812 aspartate aminotransferase [EC:2.6.1.1]                                           | kpe:KPK_1829  | + | - | - |
| ROK family protein                                                                                                                  | kpe:KPK_2005  | + | - | - |
| aatA; aspartate transaminase (EC:2.6.1.1); K00812 aspartate aminotransferase [EC:2.6.1.1]                                           | kpe:KPK_3294  | + | - | - |
| acetyl-CoA acetyltransferase ; K00626 acetyl-CoA C-acetyltransferase [EC:2.3.1.9]                                                   | kpe:KPK_2972  | + | - | - |
| sensor histidine kinase                                                                                                             | kpe:KPK_2666  | + | - | - |
| transporter, major facilitator family ; K08156 MFS transporter, DHA1 family, arabinose polymer transporter                          | kpe:KPK_2975  | + | - | - |
| amidohydrolase family protein                                                                                                       | kpe:KPK_1824  | + | - | - |
| auxiliary transport protein, membrane fusion protein (MFP) family ; K03543 multidrug resistance protein A                           | kpe:KPK_2660  | + | - | - |
| putative thiazole biosynthesis adenylyltransferase ThiF/rhodanese domain protein ; K03751 molybdopterin biosynthesis protein M      | kpe:KPK_1755  | + | - | - |
| peptidase, ArgE/DapE family (EC:3.4.-.-); K01438 acetylmithine deacetylase [EC:3.5.1.16]                                            | kpe:KPK_3289  | + | - | - |
| creatinase/peptidase, M24 family (EC:3.4.-.-); K01271 X-Pro dipeptidase [EC:3.4.13.9]                                               | kpe:KPK_3291  | + | - | - |
| SMP-30/gluconolactonase/LRE family protein                                                                                          | kpe:KPK_5219  | + | - | - |
| efflux transporter, RND family, MFP subunit                                                                                         | kpe:KPK_2667  | + | - | - |
| fimbrial usher protein                                                                                                              | kpe:KPK_0826  | + | - | - |
| putative tetracycline resistance protein                                                                                            | kpe:KPK_3280  | + | - | - |
| monooxygenase, luciferase family ; K04091 alkanesulfonate monooxygenase [EC:1.14.14.5]                                              | kpe:KPK_2268  | + | - | - |
| oxidoreductase, FAD/FMN-binding ; K10680 N-ethylmaleimide reductase [EC:1.-.-.-]                                                    | kpe:KPK_3270  | + | - | - |
| amidohydrolase family protein                                                                                                       | kpe:KPK_4860  | + | - | - |
| mandelate racemase/muconate lactonizing enzyme family protein (EC:5.1.1.-)                                                          | kpe:KPK_3290  | + | - | - |
| CTP synthase family protein                                                                                                         | kpe:KPK_3292  | + | - | - |
| putative sugar ABC transporter, ATP-binding protein                                                                                 | kpe:KPK_2000  | + | - | - |
| putative glycerol dehydrogenase ; K00005 glycerol dehydrogenase [EC:1.1.1.6]                                                        | kpe:KPK_1827  | + | - | - |
| quiA_1; quinate/shikimate dehydrogenase (pyrroloquinoline-quinone) (EC:1.1.99.25); K05358 quinate dehydrogenase (pyrroloqui         | kpe:KPK_2122  | + | - | - |
| putative sulfonate ABC transporter, sulfonate-binding protein ; K02051 sulfonate/nitrate/taurine transport system substrate-binding | kpe:KPK_3097  | + | - | - |
| oxidoreductase, aldo/keto reductase family                                                                                          | kpe:KPK_2974  | + | - | - |
| ABC transporter, periplasmic substrate-binding protein ; K02051 sulfonate/nitrate/taurine transport system substrate-binding prote  | kpe:KPK_2621  | + | - | - |
| NAD-dependent epimerase/dehydratase family protein                                                                                  | kpe:KPK_3257  | + | - | - |
| oxidoreductase, aldo/keto reductase family                                                                                          | kpe:KPK_3721  | + | - | - |
| oxidoreductase, zinc-binding dehydrogenase family                                                                                   | kpe:KPK_2328  | + | - | - |
| hypothetical protein                                                                                                                | kpe:KPK_2983  | + | - | - |
| putative transcriptional regulator, AraC family                                                                                     | kpe:KPK_3267  | + | - | - |
| hypothetical protein                                                                                                                | kpe:KPK_0827  | + | - | - |
| peptide ABC transporter, permease protein ; K02033 peptide/nickel transport system permease protein                                 | kpe:KPK_2656  | + | - | - |
| oxidoreductase, zinc-binding dehydrogenase family                                                                                   | kpe:KPK_1819  | + | - | - |
| transporter, auxin efflux carrier family ; K07088                                                                                   | kpe:KPK_1917  | + | - | - |
| transcriptional regulator, LysR family                                                                                              | kpe:KPK_5218  | + | - | - |
| D-isomer specific 2-hydroxyacid dehydrogenase family protein                                                                        | kpe:KPK_2038  | + | - | - |
| D-isomer specific 2-hydroxyacid dehydrogenase family protein                                                                        | kpe:KPK_1079  | + | - | - |
| transcriptional regulator, LysR family                                                                                              | kpe:KPK_3096  | + | - | - |
| hypothetical protein                                                                                                                | kpe:KPK_1756  | + | - | - |
| amino acid ABC transporter, permease protein                                                                                        | kpe:KPK_1821  | + | - | - |
| transcriptional regulator, LysR family                                                                                              | kpe:KPK_3269  | + | - | - |
| transcriptional regulator, LysR family                                                                                              | kpe:KPK_2581  | + | - | - |
| dihydrodipicolinate synthetase family protein                                                                                       | kpe:KPK_3293  | + | - | - |
| transcriptional regulator, LysR family                                                                                              | kpe:KPK_3098  | + | - | - |
| auxiliary transport protein, membrane fusion protein (MFP) family                                                                   | kpe:KPK_3337  | + | - | - |

|                                                                                                                                  |                |   |   |   |
|----------------------------------------------------------------------------------------------------------------------------------|----------------|---|---|---|
| transcriptional regulator, LysR family                                                                                           | kpe:KPK_2824   | + | - | - |
| dgoK; 2-dehydro-3-deoxygalactonokinase (EC:2.7.1.58); K00883 2-dehydro-3-deoxygalactonokinase [EC:2.7.1.58]                      | kpe:KPK_2034   | + | - | - |
| putative cysteine synthase B ; K12339 cysteine synthase B [EC:2.5.1.47]                                                          | kpe:KPK_1752   | + | - | - |
| transcriptional regulator, LysR family                                                                                           | kpe:KPK_4863   | + | - | - |
| putative sugar ABC transporter, permease protein ; K02025 multiple sugar transport system permease protein                       | kpe:KPK_2003   | + | - | - |
| transcriptional regulator, GntR family                                                                                           | kpe:KPK_3285   | + | - | - |
| amino acid ABC transporter, periplasmic amino acid-binding protein                                                               | kpe:KPK_1820   | + | - | - |
| QbdB protein                                                                                                                     | kpe:KPK_2669   | + | - | - |
| transcriptional regulator, LysR family                                                                                           | kpe:KPK_2822   | + | - | - |
| transcriptional regulator, LysR family                                                                                           | kpe:KPK_2816   | + | - | - |
| hypothetical protein                                                                                                             | kpe:KPK_1875   | + | - | - |
| transcriptional regulator, LysR family                                                                                           | kpe:KPK_3256   | + | - | - |
| diguanylate cyclase/cyclic diguanylate phosphodiesterase                                                                         | kpe:KPK_2890   | + | - | - |
| uca; UreA carboxylase (EC:6.3.4.6)                                                                                               | kpe:KPK_2626   | + | - | - |
| transcriptional regulator, LysR family                                                                                           | kpe:KPK_2589   | + | - | - |
| amino acid ABC transporter, periplasmic amino acid-binding protein                                                               | kpe:KPK_1532   | + | - | - |
| transcriptional regulator, AraC family                                                                                           | kpe:KPK_0599   | + | - | - |
| peptide ABC transporter, permease protein ; K02034 peptide/nickel transport system permease protein                              | kpe:KPK_2657   | + | - | - |
| amino acid ABC transporter, periplasmic amino acid-binding protein ; K10018 octopine/nopaline transport system substrate-binding | kpe:KPK_3146   | + | - | - |
| metallo-beta-lactamase family protein ; K06897                                                                                   | kpe:KPK_0638   | + | - | - |
| putative sugar ABC transporter, permease protein ; K02026 multiple sugar transport system permease protein                       | kpe:KPK_2002   | + | - | - |
| short chain dehydrogenase                                                                                                        | kpe:KPK_3268   | + | - | - |
| ABC transporter, permease protein ; K02050 sulfonate/nitrate/taurine transport system permease protein                           | kpe:KPK_2622   | + | - | - |
| amino acid ABC transporter, periplasmic amino acid-binding protein                                                               | kpe:KPK_3286   | + | - | - |
| amino acid ABC transporter, ATP-binding protein ; K10021 octopine/nopaline transport system ATP-binding protein [EC:3.6.3.-]     | kpe:KPK_3143   | + | - | - |
| amino acid ABC transporter, ATP-binding protein                                                                                  | kpe:KPK_3100   | + | - | - |
| amino acid ABC transporter, periplasmic amino acid-binding protein                                                               | kpe:KPK_3099   | + | - | - |
| putative pyrroline-5-carboxylate reductase ; K00286 pyrroline-5-carboxylate reductase [EC:1.5.1.2]                               | kpe:KPK_1534   | + | - | - |
| hypothetical protein                                                                                                             | kpe:KPK_2971   | + | - | - |
| MipA family protein                                                                                                              | kpe:KPK_2664   | + | - | - |
| oxidoreductase, short chain dehydrogenase/reductase family ; K00059 3-oxoacyl-[acyl-carrier protein] reductase [EC:1.1.1.100]    | kpe:KPK_3284   | + | - | - |
| amino acid ABC transporter, ATP-binding protein                                                                                  | kpe:KPK_1529   | + | - | - |
| ABC transporter, ATP-binding protein ; K02049 sulfonate/nitrate/taurine transport system ATP-binding protein                     | kpe:KPK_2623   | + | - | - |
| hypothetical protein                                                                                                             | kpe:KPK_3297   | + | - | - |
| amino acid ABC transporter, ATP-binding protein                                                                                  | kpe:KPK_1823   | + | - | - |
| hypothetical protein                                                                                                             | kpe:KPK_2676   | + | - | - |
| amino acid ABC transporter, permease protein                                                                                     | kpe:KPK_1531   | + | - | - |
| putative sulfonate ABC transporter, ATP-binding protein ; K02049 sulfonate/nitrate/taurine transport system ATP-binding protein  | kpe:KPK_3094   | + | - | - |
| acetyltransferase, GNAT family                                                                                                   | kpe:KPK_2815   | + | - | - |
| amino acid ABC transporter, ATP-binding protein ; K02028 polar amino acid transport system ATP-binding protein [EC:3.6.3.21]     | kpe:KPK_3288   | + | - | - |
| amino acid ABC transporter, permease protein ; K10019 octopine/nopaline transport system permease protein                        | kpe:KPK_3144   | + | - | - |
| hypothetical protein ; K09967 hypothetical protein                                                                               | kpe:KPK_2624   | + | - | - |
| amino acid ABC transporter, permease protein ; K02029 polar amino acid transport system permease protein                         | kpe:KPK_3287   | + | - | - |
| amino acid ABC transporter, permease protein ; K10020 octopine/nopaline transport system permease protein                        | kpe:KPK_3145   | + | - | - |
| response regulator                                                                                                               | kpe:KPK_1915   | + | - | - |
| transcriptional regulator, IclR family                                                                                           | kpe:KPK_1077   | + | - | - |
| hypothetical protein                                                                                                             | kpe:KPK_2330   | + | - | - |
| fusaric acid resistance domain protein                                                                                           | kpe:KPK_3334   | + | - | - |
| amino acid ABC transporter, permease protein                                                                                     | kpe:KPK_1530   | + | - | - |
| hypothetical protein                                                                                                             | kpe:KPK_1078   | + | - | - |
| DNA-binding response regulator                                                                                                   | kpe:KPK_2665   | + | - | - |
| transporter gate domain protein                                                                                                  | kpe:KPK_4862   | + | - | - |
| gram-negative pilus assembly chaperone                                                                                           | kpe:KPK_0825   | + | - | - |
| transcriptional regulator, LuxR family                                                                                           | kpe:KPK_2813   | + | - | - |
| amino acid ABC transporter, permease protein                                                                                     | kpe:KPK_3101   | + | - | - |
| HAD hydrolase, IB family, TIGR01490                                                                                              | kpe:KPK_2970   | + | - | - |
| nthB; nitrile hydratase, beta subunit (EC:4.2.1.84); K01721 nitrile hydratase [EC:4.2.1.84]                                      | kpe:KPK_2673   | + | - | - |
| hypothetical protein                                                                                                             | kpe:KPK_2628   | + | - | - |
| hypothetical protein ; K09967 hypothetical protein                                                                               | kpe:KPK_2625   | + | - | - |
| glutathione S-transferase (EC:2.5.1.18); K00799 glutathione S-transferase [EC:2.5.1.18]                                          | kpe:KPK_2590   | + | - | - |
| transcriptional regulator, LuxR family                                                                                           | kpe:KPK_2808   | + | - | - |
| nthA; nitrile hydratase, alpha subunit (EC:4.2.1.84); K01721 nitrile hydratase [EC:4.2.1.84]                                     | kpe:KPK_2672   | + | - | - |
| transcriptional regulator, TetR family                                                                                           | kpe:KPK_3296   | + | - | - |
| hypothetical protein                                                                                                             | kpe:KPK_3271   | + | - | - |
| fimbrial protein ; K07345 major type 1 subunit fimbria (pilin)                                                                   | kpe:KPK_1142   | + | - | - |
| tetR; tetracycline repressor protein class A from transposon 1721                                                                | kpe:KPK_3281   | + | - | - |
| phosphoglycerate mutase family protein                                                                                           | kpe:KPK_2677   | + | - | - |
| hypothetical protein                                                                                                             | kpe:KPK_0641   | + | - | - |
| translocator protein, LysE family                                                                                                | kpe:KPK_2817   | + | - | - |
| isochorismatase hydrolase family protein (EC:3.-.-.-); K05993 isochorismatase [EC:3.3.2.1]                                       | kpe:KPK_3346   | + | - | - |
| fimbrial protein                                                                                                                 | kpe:KPK_0824   | + | - | - |
| hypothetical protein                                                                                                             | kpe:KPK_1533   | + | - | - |
| acetyltransferase, GNAT family                                                                                                   | kpe:KPK_1825   | + | - | - |
| PilN family protein ; K12289 pilus assembly protein HofN                                                                         | kpe:KPK_0351   | + | - | - |
| hypothetical protein                                                                                                             | kpe:KPK_2698   | + | - | - |
| atzF; allophanate hydrolase (EC:3.5.1.54); K02433 aspartyl-tRNA(Asn)/glutamyl-tRNA (Gln) amidotransferase subunit A [EC:6.3      | kpe:KPK_2627   | + | - | - |
| hypothetical protein ; K09936 hypothetical protein                                                                               | kpe:KPK_2583   | + | - | - |
| transcriptional regulator, MarR family ; K03712 MarR family transcriptional regulator                                            | kpe:KPK_2661   | + | - | - |
| protozoan/cyanobacterial globin family protein ; K06886 hemoglobin                                                               | kpe:KPK_2670   | + | - | - |
| hypothetical protein                                                                                                             | kpe:KPK_3093   | + | - | - |
| OsmC family protein                                                                                                              | kpe:KPK_3347   | + | - | - |
| hypothetical protein                                                                                                             | kpe:KPK_4861   | + | - | - |
| hypothetical protein                                                                                                             | kpe:KPK_2674   | + | - | - |
| glyoxalase family protein                                                                                                        | kpe:KPK_2729   | + | - | - |
| hypothetical protein ; K09936 hypothetical protein                                                                               | kpe:KPK_2582   | + | - | - |
| hypothetical protein ; K12290 pilus assembly protein HofO                                                                        | kpe:KPK_0352   | + | - | - |
| hypothetical protein                                                                                                             | kpe:KPK_1753   | + | - | - |
| glycerophosphoryl diester phosphodiesterase ; K01126 glycerophosphoryl diester phosphodiesterase [EC:3.1.4.46]                   | vap:Vapar_0332 | + | - | - |
| hypothetical protein                                                                                                             | kpe:KPK_4859   | + | - | - |

|                                                                                                                                      |               |   |   |   |
|--------------------------------------------------------------------------------------------------------------------------------------|---------------|---|---|---|
| hypothetical protein                                                                                                                 | kpe:KPK_3279  | + | - | - |
| malate dehydrogenase ; K00027 malate dehydrogenase (oxaloacetate-decarboxylating) [EC:1.1.1.38]                                      | kpe:KPK_1916  | + | - | - |
| pemK; protein PemK ; K07171                                                                                                          | kpe:KPK_1741  | + | - | - |
| pemI; protein PemI ; K07172                                                                                                          | kpe:KPK_1740  | + | - | - |
| hypothetical protein                                                                                                                 | kpe:KPK_2591  | + | - | - |
| hypothetical protein                                                                                                                 | kpe:KPK_3295  | + | - | - |
| peptide ABC transporter, ATP binding protein ; K02031 peptide/nickel transport system ATP-binding protein; K02032 peptide/nick       | kpe:KPK_2658  | + | - | - |
| ThiS family protein                                                                                                                  | kpe:KPK_1754  | + | - | - |
| hypothetical protein                                                                                                                 | kpe:KPK_4896  | + | - | - |
| putative Na/Pi-cotransporter ; K03324 phosphate:Na+ symporter, PNaS family                                                           | kpe:KPK_3278  | + | - | - |
| hypothetical protein                                                                                                                 | kpe:KPK_2430  | + | - | - |
| hypothetical protein                                                                                                                 | kpe:KPK_1952  | + | - | - |
| pmrD; polymyxin B resistance protein PmrD                                                                                            | kpe:KPK_1746  | + | - | - |
| hypothetical protein                                                                                                                 | kpe:KPK_3274  | + | - | - |
| putative xylan 1,4-beta-xylosidase                                                                                                   | kpe:KPK_0598  | + | - | - |
| hypothetical protein                                                                                                                 | kpe:KPK_0639  | + | - | - |
| RND transporter, hydrophobe/amphiphile efflux-1 (HAE1) family                                                                        | kpe:KPK_2668  | + | - | - |
| hypothetical protein                                                                                                                 | kpe:KPK_2950  | + | - | - |
| hypothetical protein                                                                                                                 | kpe:KPK_3277  | + | - | - |
| hypothetical protein                                                                                                                 | kpe:KPK_3335  | + | - | - |
| hypothetical protein                                                                                                                 | kpe:KPK_2675  | + | - | - |
| hypothetical protein                                                                                                                 | pat:Patl_0188 | + | - | - |
| hypothetical protein                                                                                                                 | kpe:KPK_1951  | + | - | - |
| nifH; pyruvate-flavodoxin oxidoreductase (EC:1.2.7.1); K03737 putative pyruvate-flavodoxin oxidoreductase [EC:1.2.7.-]               | kpe:KPK_1715  | + | + | - |
| peptidyl-prolyl cis-trans isomerase, FKBP-type domain                                                                                | kpe:KPK_4610  | + | + | - |
| porin, LamB family                                                                                                                   | kpe:KPK_1432  | + | + | - |
| aldH; aldehyde dehydrogenase (NADP(+)) (EC:1.2.1.4)                                                                                  | kpe:KPK_4822  | + | + | - |
| amino acid permease family protein                                                                                                   | kpe:KPK_4821  | + | + | - |
| nifA; Nif-specific regulatory protein ; K02584 Nif-specific regulatory protein                                                       | kpe:KPK_1698  | + | + | - |
| nifK; nitrogenase molybdenum-iron protein beta chain (EC:1.18.6.1); K02591 nitrogenase molybdenum-iron protein beta chain [E         | kpe:KPK_1712  | + | + | - |
| nifL; nitrogen fixation negative regulator NifL                                                                                      | kpe:KPK_1699  | + | + | - |
| nifD; nitrogenase molybdenum-iron protein alpha chain (EC:1.18.6.1); K02586 nitrogenase molybdenum-iron protein alpha chain          | kpe:KPK_1713  | + | + | - |
| nifB; nitrogenase cofactor biosynthesis protein NifB ; K02585 nitrogen fixation protein NifB                                         | kpe:KPK_1697  | + | + | - |
| cobZ; tricarballylate dehydrogenase                                                                                                  | kpe:KPK_3866  | + | + | - |
| nifN; nitrogenase molybdenum-iron cofactor biosynthesis protein NifN ; K02592 nitrogenase molybdenum-iron protein NifN               | kpe:KPK_1708  | + | + | - |
| nifE; nitrogenase MoFe cofactor biosynthesis protein NifE ; K02587 nitrogenase molybdenum-cofactor synthesis protein NifE            | kpe:KPK_1709  | + | + | - |
| PTS system, lactose/cellobiose family IIC component (EC:2.7.1.69); K02761 PTS system, cellobiose-specific IIC component              | kpe:KPK_1430  | + | + | - |
| monoxygenase, luciferase family                                                                                                      | kpe:KPK_2008  | + | + | - |
| hypothetical protein ; K00837 [EC:2.6.1.-]                                                                                           | kpe:KPK_3265  | + | + | - |
| transporter, major facilitator family ; K03535 MFS transporter, ACS family, glucarate transporter                                    | kpe:KPK_2459  | + | + | - |
| transporter, major facilitator family                                                                                                | kpe:KPK_4700  | + | + | - |
| citrate:proton symporter                                                                                                             | kpe:KPK_3868  | + | + | - |
| pyridine nucleotide-disulfide oxidoreductase                                                                                         | kpe:KPK_4828  | + | + | - |
| acyl-CoA dehydrogenase, C-terminal domain protein                                                                                    | kpe:KPK_2322  | + | + | - |
| nifS; cysteine desulfurase NifS (EC:2.8.1.7); K04487 cysteine desulfurase [EC:2.8.1.7]                                               | kpe:KPK_1705  | + | + | - |
| mandelate racemase/muconate lactonizing enzyme family protein ; K01781 mandelate racemase [EC:5.1.2.2]                               | kpe:KPK_2460  | + | + | - |
| nifV; homocitrate synthase (EC:2.3.3.14); K01655 homocitrate synthase [EC:2.3.3.14]; K02594 homocitrate synthase NifV                | kpe:KPK_1704  | + | + | - |
| citB; citrate utilization protein B                                                                                                  | kpe:KPK_3867  | + | + | - |
| auxiliary transport protein, membrane fusion protein (MFP) family                                                                    | kpe:KPK_1564  | + | + | - |
| FAD-dependent oxidoreductase                                                                                                         | kpe:KPK_4826  | + | + | - |
| hypothetical protein                                                                                                                 | kpe:KPK_4500  | + | + | - |
| quaternary amine uptake ABC transporter (QAT) family, ATP-binding protein ; K05847 osmoprotectant transport system ATP-bind          | kpe:KPK_2012  | + | + | - |
| transcriptional regulator, LuxR family                                                                                               | kpe:KPK_2311  | + | + | - |
| hypothetical protein                                                                                                                 | kpe:KPK_3698  | + | + | - |
| ABC transporter, ATP-binding protein ; K02071 D-methionine transport system ATP-binding protein                                      | kpe:KPK_2319  | + | + | - |
| acyl-coenzyme A:6-aminopenicillanic acid acyl-transferase                                                                            | kpe:KPK_3259  | + | + | - |
| sugar binding transcriptional regulator, LacI family ; K02529 LacI family transcriptional regulator                                  | kpe:KPK_5053  | + | + | - |
| sugar binding transcriptional regulator, LacI family ; K06145 LacI family transcriptional regulator, gluconate utilization system Gr | kpe:KPK_2461  | + | + | - |
| transcriptional regulator, LysR family                                                                                               | kpe:KPK_1561  | + | + | - |
| transcriptional regulator, LysR family                                                                                               | kpe:KPK_1561  | + | + | - |
| sugar binding transcriptional regulator, LacI family                                                                                 | kpe:KPK_4702  | + | + | - |
| sugar binding transcriptional regulator, LacI family ; K02529 LacI family transcriptional regulator                                  | kpe:KPK_5053  | + | + | - |
| D-isomer specific 2-hydroxyacid dehydrogenase family protein ; K00050 hydroxypyruvate reductase [EC:1.1.1.81]                        | kpe:KPK_4701  | + | + | - |
| proline racemase family protein ; K12658 4-hydroxyproline epimerase [EC:5.1.1.8]                                                     | kpe:KPK_4825  | + | + | - |
| putative lipoprotein                                                                                                                 | kpe:KPK_2561  | + | + | - |
| dihydrodipicolinate synthetase family protein ; K01714 dihydrodipicolinate synthase [EC:4.2.1.52]                                    | kpe:KPK_5052  | + | + | - |
| transcriptional regulator, LysR family                                                                                               | kpe:KPK_3865  | + | + | - |
| paeX; acetyltransferase (EC:3.1.1.6)                                                                                                 | kpe:KPK_1995  | + | + | - |
| putative dihydrodipicolinate synthase ; K01714 dihydrodipicolinate synthase [EC:4.2.1.52]                                            | kpe:KPK_4823  | + | + | - |
| quaternary amine uptake ABC transporter (QAT) family, periplasmic amine-binding protein ; K05845 osmoprotectant transport sy         | kpe:KPK_2009  | + | + | - |
| nifH; nitrogenase iron protein (EC:1.18.6.1); K02588 nitrogenase iron protein NifH [EC:1.18.6.1]                                     | kpe:KPK_1714  | + | + | - |
| hypothetical protein                                                                                                                 | kpe:KPK_3698  | + | + | - |
| putative diaminopimelate epimerase ; K01778 diaminopimelate epimerase [EC:5.1.1.7]                                                   | kpe:KPK_2448  | + | + | - |
| transcriptional regulator, RpiR family                                                                                               | kpe:KPK_3266  | + | + | - |
| hypothetical protein                                                                                                                 | kpe:KPK_1991  | + | + | - |
| nifU; Fe-S cluster assembly protein NifU ; K04488 nitrogen fixation protein NifU and related proteins; K07400 Fe/S biogenesis pr     | kpe:KPK_1706  | + | + | - |
| metallo-beta-lactamase domain protein                                                                                                | kpe:KPK_2333  | + | + | - |
| transcriptional regulator, AraC family                                                                                               | kpe:KPK_4824  | + | + | - |
| hypothetical protein                                                                                                                 | kpe:KPK_1990  | + | + | - |
| nifM; nitrogen fixation protein NifM                                                                                                 | kpe:KPK_1701  | + | + | - |
| ABC transporter, periplasmic substrate-binding protein ; K02073 D-methionine transport system substrate-binding protein              | kpe:KPK_2320  | + | + | - |
| hypothetical protein                                                                                                                 | kpe:KPK_2983  | + | + | - |
| idnO; gluconate 5-dehydrogenase (EC:1.1.1.69); K00046 gluconate 5-dehydrogenase [EC:1.1.1.69]                                        | kpe:KPK_4703  | + | + | - |
| oligogalacturonate-specific porin protein (KdgM)                                                                                     | kpe:KPK_5054  | + | + | - |
| oligogalacturonate-specific porin protein (KdgM)                                                                                     | kpe:KPK_5054  | + | + | - |
| transcriptional regulator, GntR family ; K03482 GntR family transcriptional regulator, glv operon transcriptional regulator          | kpe:KPK_1428  | + | + | - |
| glnQ; glutamine ABC transporter ATP-binding protein ; K10038 glutamine transport system ATP-binding protein [EC:3.6.3.-]             | kpe:KPK_3261  | + | + | - |
| thiopurine S-methyltransferase family protein                                                                                        | kpe:KPK_2449  | + | + | - |
| ABC transporter, permease protein ; K02072 D-methionine transport system permease protein                                            | kpe:KPK_2321  | + | + | - |

|                                                                                                                             |                   |   |   |   |
|-----------------------------------------------------------------------------------------------------------------------------|-------------------|---|---|---|
| hypothetical protein                                                                                                        | kpe:KPK_5050      | + | + | - |
| hypothetical protein                                                                                                        | kpe:KPK_5050      | + | + | - |
| quaternary amine uptake ABC transporter (QAT) family, permease protein ; K05846 osmoprotectant transport system permease pr | kpe:KPK_2010      | + | + | - |
| NifY protein                                                                                                                | kpe:KPK_1710      | + | + | - |
| O-methyltransferase family protein                                                                                          | kpe:KPK_2982      | + | + | - |
| quaternary amine uptake ABC transporter (QAT) family, permease protein ; K05846 osmoprotectant transport system permease pr | kpe:KPK_2011      | + | + | - |
| neutral amino-acid efflux protein ; K11249 cysteine/O-acetylserine efflux protein                                           | kpe:KPK_4501      | + | + | - |
| neutral amino-acid efflux protein ; K11249 cysteine/O-acetylserine efflux protein                                           | kpe:KPK_4501      | + | + | - |
| putative lipoprotein                                                                                                        | kpe:KPK_4061      | + | + | - |
| pseudogene                                                                                                                  | kpe:KPK_1582      | + | + | - |
| idnK; thermosensitive gluconokinase (EC:2.7.1.12); K00851 gluconokinase [EC:2.7.1.12]                                       | kpe:KPK_4704      | + | + | - |
| nifF; flavodoxin FldA ; K03839 flavodoxin I                                                                                 | kpe:KPK_1700      | + | + | - |
| pseudogene                                                                                                                  | kpe:KPK_1582      | + | + | - |
| nifQ; nitrogen fixation protein NifQ                                                                                        | kpe:KPK_1696      | + | + | - |
| acetyltransferase, GNAT family                                                                                              | kpe:KPK_5257      | + | + | - |
| acetyltransferase, GNAT family                                                                                              | kpe:KPK_5257      | + | + | - |
| hypothetical protein                                                                                                        | kpe:KPK_2523      | + | + | - |
| nifX; NifX protein ; K02596 nitrogen fixation protein NifX                                                                  | kpe:KPK_1707      | + | + | - |
| hypothetical protein                                                                                                        | kpe:KPK_4705      | + | + | - |
| putative anti-sigma B factor ; K04757 anti-sigma B factor [EC:2.7.11.1]                                                     | kpe:KPK_3075      | + | + | - |
| putative transporter                                                                                                        | kpe:KPK_5051      | + | + | - |
| DNA-binding protein                                                                                                         | kpe:KPK_1581      | + | + | - |
| putative NifZ protein ; K02597 nitrogen fixation protein NifZ                                                               | kpe:KPK_1702      | + | + | - |
| pseudogene                                                                                                                  | kpe:KPK_4089      | + | + | - |
| hypothetical protein                                                                                                        | kpe:KPK_3326      | + | + | - |
| hypothetical protein                                                                                                        | kpe:KPK_5263      | + | + | - |
| hypothetical protein                                                                                                        | kpe:KPK_1563      | + | + | - |
| hypothetical protein                                                                                                        | kpe:KPK_1563      | + | + | - |
| hypothetical protein                                                                                                        | kpe:KPK_5262      | + | + | - |
| hypothetical protein                                                                                                        | kpe:KPK_2986      | + | + | - |
| PTS system, lactose/cellobiose specific IIB subunit ; K02760 PTS system, cellobiose-specific IIB component [EC:2.7.1.69]    | kpe:KPK_1429      | + | + | - |
| PTS system, lactose/cellobiose specific IIA subunit ; K02759 PTS system, cellobiose-specific IIA component [EC:2.7.1.69]    | kpe:KPK_1431      | + | + | - |
| PTS system, lactose/cellobiose specific IIA subunit ; K02759 PTS system, cellobiose-specific IIA component [EC:2.7.1.69]    | kpe:KPK_1431      | + | + | - |
| hypothetical protein                                                                                                        | kpe:KPK_3664      | + | + | - |
| DNA-binding protein                                                                                                         | kpe:KPK_2987      | + | + | - |
| PTS system, lactose/cellobiose specific IIB subunit ; K02760 PTS system, cellobiose-specific IIB component [EC:2.7.1.69]    | kpe:KPK_1429      | + | + | - |
| 2Fe-2S iron-sulfur cluster binding domain protein                                                                           | kpe:KPK_4827      | + | + | - |
| putative NifW protein                                                                                                       | kpe:KPK_1703      | + | + | - |
| hypothetical protein                                                                                                        | kpe:KPK_0823      | + | + | - |
| nifT; probable nitrogen fixation protein FixT ; K02593 nitrogen fixation protein NifT                                       | kpe:KPK_1711      | + | + | - |
| hypothetical protein ; K07090                                                                                               | kpe:KPK_2573      | + | + | - |
| hypothetical protein                                                                                                        | kpe:KPK_3933      | + | + | - |
| hypothetical protein                                                                                                        | kpu:KPI_2471      | + | + | - |
| hypothetical protein                                                                                                        | cel:F35A5.1       | + | + | - |
| pseudogene                                                                                                                  | kpe:KPK_1743      | + | + | - |
| hypothetical protein                                                                                                        | kpe:KPK_2219      | + | + | - |
| protein translocase subunit SecA ; K03070 preprotein translocase subunit SecA                                               | lhk:LHK_03041     | + | + | - |
| hypothetical protein                                                                                                        | kpu:KPI_3126      | + | + | - |
| hypothetical protein                                                                                                        | kpu:KPI_4310      | + | + | - |
| fslC; G-protein-coupled receptor (GPCR) family protein                                                                      | ddi:DDB_0231833   | + | + | - |
| hypothetical protein                                                                                                        | kpe:KPK_2689      | + | + | - |
| hypothetical protein                                                                                                        | kpu:KPI_2726      | + | + | - |
| putative heat shock protein ; K04046 hypothetical chaperone protein                                                         | smd:Smed_0648     | + | + | - |
| hypothetical protein                                                                                                        | kpe:KPK_3119      | + | + | - |
| hypothetical protein                                                                                                        | kpe:KPK_0541      | + | + | - |
| hypothetical protein                                                                                                        | kpu:KPI_2017      | + | + | - |
| hypothetical protein                                                                                                        | kpe:KPK_1143      | + | + | - |
| hypothetical protein                                                                                                        | kpu:KPI_2017      | + | + | - |
| hypothetical protein                                                                                                        | kpu:KPI_3986      | + | + | - |
| hypothetical protein                                                                                                        | kpe:KPK_2812      | + | + | - |
| hypothetical protein                                                                                                        | kpe:KPK_5443      | + | + | - |
| hypothetical protein                                                                                                        | kpe:KPK_5243      | + | + | - |
| LipA and NB-ARC domain protein                                                                                              | afm:AFUA_3G14650  | + | + | - |
| hydroxypyruvate reductase (EC:1.1.1.81); K00050 hydroxypyruvate reductase [EC:1.1.1.81]                                     | lch:Lcho_3177     | + | + | - |
| hypothetical protein                                                                                                        | kpe:KPK_1223      | + | + | - |
| hypothetical protein                                                                                                        | tgo:TGME49_020200 | + | + | - |
| hypothetical protein                                                                                                        | kpe:KPK_1141      | + | + | - |
| hypothetical protein                                                                                                        | kpu:KPI_2732      | + | + | - |
| YAL10F07018p                                                                                                                | yli:YAL10F07018g  | + | + | - |
| hypothetical protein                                                                                                        | kpe:KPK_3446      | + | + | - |
| putative phosphatase/sulfatase                                                                                              | kpu:KPI_4085      | - | + | + |
| phnW; 2-aminoethylphosphonate--pyruvate transaminase ; K03430 2-aminoethylphosphonate-pyruvate transaminase [EC:2.6.1.37]   | kpu:KPI_5436      | - | + | + |
| putative arylsulfatase ; K01130 arylsulfatase [EC:3.1.6.1]                                                                  | kpu:KPI_1453      | - | + | + |
| hypothetical protein ; K07047                                                                                               | kpn:KPN_01910     | - | + | + |
| bifunctional putative acetyl-CoA:acetoacetyl-CoA transferase: alpha subunit/beta subunit                                    | kpu:KPI_2747      | - | + | + |
| putative 5'-nucleotidase/2',3'-cyclic phosphodiesterase                                                                     | kpu:KPI_0099      | - | + | + |
| putative metal-dependent phosphohydrolase with HD subdomain ; K06885                                                        | kpu:KPI_2389      | - | + | + |
| hypothetical protein                                                                                                        | kpu:KPI_0751      | - | + | + |
| putative general substrate transporter                                                                                      | kpu:KPI_4124      | - | + | + |
| codB; probable transporter ; K03457 nucleobase:cation symporter-1, NCS1 family                                              | kpu:KPI_2330      | - | + | + |
| hypothetical protein ; K11911 type VI secretion system protein VasL                                                         | kpu:KPI_3364      | - | + | + |
| major facilitator family transporter                                                                                        | kpn:KPN_01692     | - | + | + |
| putative alpha-galactosidases/6-phospho-beta-glucosidases ; K01222 6-phospho-beta-glucosidase [EC:3.2.1.86]                 | kpu:KPI_2349      | - | + | + |
| putative Na <sup>+</sup> dependent nucleoside transporter ; K03317 concentrative nucleoside transporter, CNT family         | kpu:KPI_0794      | - | + | + |
| hypothetical protein                                                                                                        | kpu:KPI_0750      | - | + | + |
| putative acetyl-CoA acetyltransferase ; K00626 acetyl-CoA C-acetyltransferase [EC:2.3.1.9]                                  | kpu:KPI_2745      | - | + | + |
| putative iron-sulfur modifier protein ; K06871                                                                              | kpn:KPN_00528     | - | + | + |
| putative arylsulfatase regulator ; K06871                                                                                   | kpu:KPI_4084      | - | + | + |
| glycerate kinase I                                                                                                          | kpn:KPN_01689     | - | + | + |

|                                                                                                                              |                  |   |   |   |
|------------------------------------------------------------------------------------------------------------------------------|------------------|---|---|---|
| putative sugar diacid utilization regulator                                                                                  | kpn:KPN_01688    | - | + | + |
| hypothetical protein                                                                                                         | kpu:KPI_0097     | - | + | + |
| putative arylsulfatase regulator ; K06871                                                                                    | kpn:KPN_02831    | - | + | + |
| phnS; 2-aminoethylphosphonate transporter, periplasmic-binding component ; K11081 2-aminoethylphosphonate transport system   | kpn:KPN_04061    | - | + | + |
| transcriptional regulator                                                                                                    | kpn:KPN_04798    | - | + | + |
| putative LysR-family bacterial regulatory protein                                                                            | kpu:KPI_2348     | - | + | + |
| hypothetical protein                                                                                                         | kpu:KPI_0103     | - | + | + |
| phnU; 2-aminoethylphosphonate transporter, membrane component ; K11083 2-aminoethylphosphonate transport system permease     | kpn:KPN_04059    | - | + | + |
| hypothetical protein                                                                                                         | kpn:KPN_02871    | - | + | + |
| phnV; 2-aminoethylphosphonate transport system membrane component ; K11082 2-aminoethylphosphonate transport system permease | kpu:KPI_5429     | - | + | + |
| phnR; 2-aminoethylphosphonate transporter repressor                                                                          | kpu:KPI_5434     | - | + | + |
| hypothetical protein                                                                                                         | kpu:KPI_3088     | - | + | + |
| hypothetical protein                                                                                                         | kpu:KPI_3088     | - | + | + |
| LuxR transcriptional regulator                                                                                               | kpn:KPN_01599    | - | + | + |
| keto-hydroxyglutarate-aldolase/keto-deoxy- phosphogluconate aldolase ; K01631 2-dehydro-3-deoxyphosphogalactonate aldolase   | kpu:KPI_0755     | - | + | + |
| putative fimbrial-like protein ; K07345 major type 1 subunit fimbria (pilin)                                                 | kpu:KPI_4251     | - | + | + |
| hypothetical protein                                                                                                         | kpu:KPI_3023     | - | + | + |
| hypothetical protein                                                                                                         | kpu:KPI_0752     | - | + | + |
| hypothetical protein                                                                                                         | kpu:KPI_0752     | - | + | + |
| hypothetical protein                                                                                                         | spq:SPAB_05210   | - | + | + |
| hypothetical protein                                                                                                         | kpu:KPI_0715     | - | + | + |
| hypothetical protein                                                                                                         | kpu:KPI_0715     | - | + | + |
| bioA; adenosylmethionine--8-amino-7-oxononanoate transaminase ; K00833 adenosylmethionine-8-amino-7-oxononanoate amino       | kpu:KPI_1749     | - | + | + |
| hypothetical protein                                                                                                         | ecm:EcSMS35_2443 | - | + | + |
| hypothetical protein                                                                                                         | spq:SPAB_04790   | - | + | + |
| hypothetical protein                                                                                                         | kpu:KPI_4791     | - | + | + |
| hypothetical protein                                                                                                         | mlo:mli1989      | - | + | + |
| hypothetical protein                                                                                                         | kpe:KPK_0327     | - | + | + |
| hypothetical protein                                                                                                         | kpe:KPK_0821     | - | + | + |
| hypothetical protein                                                                                                         | kpu:KPI_0751     | - | + | + |
| aminopeptidase B ; K07751 PepB aminopeptidase [EC:3.4.11.23]                                                                 | amc:MADE_03542   | - | + | + |
| putative NAD(P)-binding and starvation-sensing dehydrogenase ; K08322 starvation sensing protein RspB [EC:1.1.1.-]           | kpu:KPI_4933     | - | + | + |
| hypothetical protein                                                                                                         | kpu:KPI_2893     | - | + | + |
| hypothetical protein                                                                                                         | kpu:KPI_3434     | - | + | + |
| hypothetical protein                                                                                                         | kpu:KPI_2893     | - | + | + |
| hypothetical protein                                                                                                         | kpu:KPI_1301     | - | + | + |
| hypothetical protein                                                                                                         | kpu:KPI_2726     | - | + | + |
| hypothetical protein LOC100121689                                                                                            | nvi:100121689    | - | + | + |
| hypothetical protein                                                                                                         | kpu:KPI_1780     | - | + | + |
| putative IS1 encoded protein                                                                                                 | sfv:SFV_3919     | - | + | + |
| hypothetical protein                                                                                                         | kpu:KPI_2508     | - | + | + |
| EGF-like domain containing protein                                                                                           | bmy:BmL_48015    | - | + | + |
| cyclopropane fatty acyl phospholipid synthase ; K00574 cyclopropane-fatty-acyl-phospholipid synthase [EC:2.1.1.79]           | esa:ESA_02022    | - | + | + |
| putative ATPase                                                                                                              | hpb:HELPHY_0949  | - | + | + |
| hypothetical protein                                                                                                         | kpu:KPI_4570     | - | + | + |
| hypothetical protein                                                                                                         | lel:LLELG_04836  | - | + | + |
| yddG; hypothetical protein                                                                                                   | kpn:KPN_01868    | - | + | + |
| hypothetical protein                                                                                                         | kpu:KPI_0744     | - | + | + |
| umuC; DNA polymerase V subunit C ; K03502 DNA polymerase V                                                                   | kpu:KPI_2206     | - | + | + |
| major facilitator superfamily transporter                                                                                    | pna:Pnap_3821    | - | + | + |
| hypothetical LOC585699                                                                                                       | spu:585699       | - | + | + |
| hypothetical protein                                                                                                         | cko:CKO_03197    | - | + | + |
| putative transmembrane protein                                                                                               | kpu:KPI_0378     | - | + | + |
| putative sensor-regulator protein (EC:2.7.13.1)                                                                              | rhi:NGR_b14580   | - | + | + |
| hypothetical protein                                                                                                         | kpu:KPI_2211     | - | + | + |
| hypothetical protein                                                                                                         | vsa:VSAL_I2407   | - | + | + |
| hypothetical protein                                                                                                         | kpu:KPI_1780     | - | + | + |
| helicase domain protein                                                                                                      | oca:OCAR_7659    | - | + | + |
| hypothetical protein                                                                                                         | kpu:KPI_3326     | - | + | + |
| murC; UDP-N-acetylmuramate--L-alanine ligase ; K01924 UDP-N-acetylmuramate--alanine ligase [EC:6.3.2.8]                      | kpu:KPI_0913     | - | + | + |
| hypothetical protein                                                                                                         | aeh:Mlg_0667     | - | + | + |
| hypothetical protein ; K09904 hypothetical protein                                                                           | kpe:KPK_1537     | - | + | + |
| hypothetical protein                                                                                                         | ure:UREG_00538   | - | + | + |
| ribulokinase                                                                                                                 | kpu:KPI_3764     | - | - | + |
| putative phosphotransferase protein ; K02761 PTS system, cellobiose-specific IIC component                                   | kpn:KPN_04650    | - | - | + |
| dgoT; D-galactonate transport ; K08194 MFS transporter, ACS family, D-galactonate transporter                                | kpn:KPN_04094    | - | - | + |
| putative transmembrane amino acid transporter protein ; K03837 serine transporter                                            | kpn:KPN_00964    | - | - | + |
| hypothetical protein                                                                                                         | kpu:KPI_0271     | - | - | + |
| putative peptidase ; K06016 N-carbamoyl-L-amino-acid hydrolase [EC:3.5.1.87]                                                 | kpu:KPI_1935     | - | - | + |
| yjiO; putative sugar transport protein                                                                                       | kpu:KPI_3182     | - | - | + |
| putative peptidase ; K01451 hippurate hydrolase [EC:3.5.1.32]                                                                | kpn:KPN_00966    | - | - | + |
| diaminopropionate ammonia-lyase ; K01751 diaminopropionate ammonia-lyase [EC:4.3.1.15]                                       | kpn:KPN_00963    | - | - | + |
| regulator of gluconate (gnt) operon                                                                                          | kpu:KPI_3762     | - | - | + |
| protein of unknown function DUF979                                                                                           | kpu:KPI_1679     | - | - | + |
| dgoK; 2-oxo-3-deoxygalactonate kinase ; K00883 2-dehydro-3-deoxygalactonate kinase [EC:2.7.1.58]                             | kpn:KPN_04097    | - | - | + |
| putative ribitol dehydrogenase                                                                                               | kpn:KPN_02546    | - | - | + |
| hypothetical protein                                                                                                         | kpn:KPN_04647    | - | - | + |
| ygaZ; putative amino acid transport protein                                                                                  | kpu:KPI_0270     | - | - | + |
| protein of unknown function DUF969                                                                                           | kpu:KPI_1678     | - | - | + |
| lasT; putative RNA methyltransferase ; K02533 tRNA/rRNA methyltransferase [EC:2.1.1.-]                                       | kpn:KPN_04857    | - | - | + |
| putative Mg(2+) transport ATPase ; K07507 putative Mg2+ transporter-C (MgtC) family protein                                  | kpu:KPI_2873     | - | - | + |
| putative O-methyltransferase                                                                                                 | kpu:KPI_2488     | - | - | + |
| putative 2-component transcriptional regulator                                                                               | kpu:KPI_2619     | - | - | + |
| putative regulator with helix-turn-helix motif                                                                               | kpu:KPI_4811     | - | - | + |
| putative transport protein ; K11249 cysteine/O-acetylserine efflux protein                                                   | kpu:KPI_1076     | - | - | + |
| putative fimbrial-like protein ; K07345 major type 1 subunit fimbria (pilin)                                                 | kpu:KPI_4251     | - | - | + |
| hypothetical protein                                                                                                         | kpu:KPI_1473     | - | - | + |
| hypothetical protein                                                                                                         | kpn:KPN_03433    | - | - | + |
| regulator for leucine (or lrp) regulon and high-affinity branched-chain amino acid transport system                          | kpn:KPN_00962    | - | - | + |

|                                                                                                                                           |                       |   |   |   |
|-------------------------------------------------------------------------------------------------------------------------------------------|-----------------------|---|---|---|
| hypothetical protein                                                                                                                      | kpn:KPN_01552         | - | - | + |
| hypothetical protein                                                                                                                      | kpu:KPI_0748          | - | - | + |
| major facilitator superfamily transporter                                                                                                 | kpu:KPI_4083          | - | - | + |
| ansP; L-asparagine permease                                                                                                               | kpn:KPN_04417         | - | - | + |
| hypothetical protein                                                                                                                      | kpe:KPK_1129          | - | - | + |
| hypothetical protein                                                                                                                      | kpn:KPN_01317         | - | - | + |
| relE; putative inner membrane protein ; K06218 RelE protein                                                                               | kpu:KPI_0521          | - | - | + |
| yedR; putative outer membrane protein N precursor                                                                                         | kpu:KPI_3562          | - | - | + |
| putative phosphotransferase protein ; K02760 PTS system, cellobiose-specific IIB component [EC:2.7.1.69]                                  | kpn:KPN_04648         | - | - | + |
| yjjA; putative outer membrane protein                                                                                                     | kpn:KPN_04810         | - | - | + |
| hypothetical protein                                                                                                                      | kpu:KPI_3043          | - | - | + |
| hypothetical protein                                                                                                                      | kpu:KPI_2485          | - | - | + |
| hypothetical protein                                                                                                                      | kpe:KPK_1506          | - | - | + |
| relB; putative helix-turn-helix protein                                                                                                   | kpu:KPI_0520          | - | - | + |
| putative permease of the Na <sup>+</sup> :galactoside symporter family                                                                    | kpu:KPI_0936          | - | - | + |
| citrate transporter                                                                                                                       | msl:Msil_0517         | - | - | + |
| hypothetical protein                                                                                                                      | esa:ESA_01079         | - | - | + |
| 2-oxoacid ferredoxin oxidoreductase, beta subunit (EC:1.2.7.-); K00175 2-oxoglutarate ferredoxin oxidoreductase subunit beta [EC:1.2.7.1] | sat:SYN_03163         | - | - | + |
| SORBIIDRAFT_02g006142; hypothetical protein                                                                                               | sbi:SORBI_02g006142   | - | - | + |
| hypothetical protein                                                                                                                      | kpn:KPN_01828         | - | - | + |
| sdaC; putative L-serine dehydratase; K01752 L-serine dehydratase [EC:4.3.1.17]                                                            | stt:t0659             | - | - | + |
| yblL; catecholate siderophore receptor Fiu ; K02014 iron complex outermembrane receptor protein                                           | kpn:KPN_01250         | - | - | + |
| hypothetical protein                                                                                                                      | kpe:KPK_1129          | - | - | + |
| PTS family enzyme IIBC component, cellobiose/salicin/arbutin-specific                                                                     | kpn:KPN_01839         | - | - | + |
| hypothetical protein                                                                                                                      | tva:TVAG_373470       | - | - | + |
| hypothetical protein                                                                                                                      | kpu:KPI_0774          | - | - | + |
| hypothetical protein                                                                                                                      | kpu:KPI_3043          | - | - | + |
| DNA mismatch repair protein mutS ; K08741 DNA mismatch repair protein MSH5                                                                | edi:EDI_290570        | - | - | + |
| Urea amidolyase related protein (EC:6.3.4.6); K01941 urea carboxylase [EC:6.3.4.6]                                                        | vei:Veis_4581         | - | - | + |
| conserved hypothetical protein                                                                                                            | pfh:PFHG_02069        | - | - | + |
| hypothetical protein                                                                                                                      | kpe:KPK_2416          | - | - | + |
| putative transposase B                                                                                                                    | cro:ROD_19661         | - | - | + |
| dgoD; putative mandelate racemase/muconate lactonizing enzyme ; K01684 galactonate dehydratase [EC:4.2.1.6]                               | kpu:KPI_5473          | - | - | + |
| hypothetical protein                                                                                                                      | kpu:KPI_5509          | - | - | + |
| hypothetical protein                                                                                                                      | kpu:KPI_5510          | - | - | + |
| hypothetical protein                                                                                                                      | kpu:KPI_2547          | - | - | + |
| togT; putative oligogalacturonide transporter                                                                                             | kpu:KPI_3530          | - | - | + |
| hypothetical protein                                                                                                                      | kpu:KPI_2728          | - | - | + |
| hypothetical protein ; K12290 pilus assembly protein HofO                                                                                 | kpu:KPI_5094          | - | - | + |
| hypothetical protein                                                                                                                      | kpu:KPI_4836          | - | - | + |
| purL; phosphoribosylformylglycinamide synthase (EC:6.3.5.3); K01952 phosphoribosylformylglycinamide synthase [EC:6.3.5.3]                 | ftn:FTN_1699          | - | - | + |
| yjhX; putative oxalate:formate antiporter ; K08177 MFS transporter, OFA family, oxalate/formate antiporter                                | kpu:KPI_5250          | - | - | + |
| transcriptional regulator, LysR family                                                                                                    | kpe:KPK_5218          | - | - | + |
| hypothetical protein                                                                                                                      | kpu:KPI_0285          | - | - | + |
| hypothetical protein                                                                                                                      | kpe:KPK_3816          | - | - | + |
| hypothetical protein                                                                                                                      | kpe:KPK_3631          | - | - | + |
| FOG EAL domain-containing protein                                                                                                         | vvu:VV1_3056          | - | - | + |
| hypothetical protein                                                                                                                      | kpu:KPI_4470          | - | - | + |
| exonuclease ; K10746 exonuclease 1 [EC:3.1.-.-]                                                                                           | aag:AaeL_AAEL006209   | - | - | + |
| hypothetical protein                                                                                                                      | kpu:KPI_2587          | - | - | + |
| hypothetical protein                                                                                                                      | kpu:KPI_4511          | - | - | + |
| hypothetical protein                                                                                                                      | sed:SeD_A0834         | - | - | + |
| hypothetical protein                                                                                                                      | tva:TVAG_344220       | - | - | + |
| hypothetical protein                                                                                                                      | pbe:PB001147.02.0     | - | - | + |
| hypothetical protein                                                                                                                      | kpe:KPK_2950          | - | - | + |
| hypothetical protein                                                                                                                      | ddi:DDB_0229883       | - | - | + |
| cnrP; importin 9                                                                                                                          | kpu:KPI_0426          | - | - | + |
| yjeA; lysyl-tRNA synthetase ; K04568 lysyl-tRNA synthetase, class II [EC:6.1.1.6]                                                         | pfh:PFHG_03543        | - | - | + |
| hypothetical protein similar to ferrochelatase; K01772 ferrochelatase [EC:4.99.1.1]                                                       | kpe:KPK_2524          | - | - | + |
| hypothetical protein                                                                                                                      | pan:PODANSg5803       | - | - | + |
| hypothetical protein                                                                                                                      | ptm:GSPATT00028622001 | - | - | + |
| ybjZ; ABC-type macrolide transport system efflux carrier ; K05685 macrolide transport system permease protein; K05686 macrolide           | kpu:KPI_1880          | - | - | + |
| hypothetical protein                                                                                                                      | kpu:KPI_5277          | - | - | + |
| hypothetical protein                                                                                                                      | kpu:KPI_3296          | - | - | + |
| hypothetical protein                                                                                                                      | kpu:KPI_1447          | - | - | + |
| peptidase S41                                                                                                                             | swp:swp_1400          | - | - | + |
| hypothetical protein                                                                                                                      | kpu:KPI_0313          | - | - | + |
| hypothetical protein                                                                                                                      | cko:CKO_04875         | - | - | + |
| negative transcriptional regulator of cel operon                                                                                          | kpu:KPI_0722          | - | - | + |
| hypothetical protein LOC100273691                                                                                                         | zma:100273691         | - | - | + |
| CaJ7_0141; hypothetical protein                                                                                                           | cal:CaO19_6907        | - | - | + |
| hypothetical protein                                                                                                                      | kpu:KPI_2620          | - | - | + |
| tolA; TolA protein                                                                                                                        | ccs:CCNA_03339        | - | - | + |
| fabF; 3-oxoacyl-[acyl-carrier-protein] synthase II ; K09458 3-oxoacyl-[acyl-carrier-protein] synthase II [EC:2.3.1.179]                   | dma:DMR_39980         | - | - | + |
| hypothetical protein                                                                                                                      | kpu:KPI_2564          | - | - | + |
| hypothetical protein                                                                                                                      | kpu:KPI_3299          | - | - | + |
| hypothetical protein                                                                                                                      | kpu:KPI_2660          | - | - | + |
| hypothetical protein                                                                                                                      | kpe:KPK_1141          | - | - | + |
| hypothetical protein                                                                                                                      | gur:Gura_2475         | - | - | + |
| hypothetical protein                                                                                                                      | kpu:KPI_2286          | - | - | + |
| yfeU; hypothetical protein                                                                                                                | kpn:KPN_00289         | - | - | + |
| hypothetical protein                                                                                                                      | kpn:KPN_03988         | - | - | + |
| hypothetical protein                                                                                                                      | kpu:KPI_3995          | - | - | + |
| Clan ME, family M16, insulinase-like metallopeptidase ; K06972                                                                            | tva:TVAG_371040       | - | - | + |
| putative AraC-type regulatory protein                                                                                                     | kpu:KPI_2616          | - | - | + |
| hypothetical protein                                                                                                                      | kpu:KPI_0526          | - | - | + |
| ptsP; phosphoenolpyruvate-protein phosphotransferase (EC:2.7.3.9); K08484 phosphotransferase system, enzyme I, PtsP [EC:2.7.3.9]          | bra:BRADO0573         | - | - | + |
| ygdL; putative enzyme                                                                                                                     | kpn:KPN_04165         | - | - | + |
| hypothetical protein                                                                                                                      | kpu:KPI_2660          | - | - | + |



|                                                                                                                                     |                       |   |   |   |
|-------------------------------------------------------------------------------------------------------------------------------------|-----------------------|---|---|---|
| hypothetical protein                                                                                                                | kpu:KPI_2618          | - | - | + |
| hypothetical protein                                                                                                                | bra:BRADO6983         | - | - | + |
| hypothetical protein                                                                                                                | kpu:KPI_4510          | - | - | + |
| membrane anchored protein                                                                                                           | reh:H16_A0029         | - | - | + |
| aliphatic sulfonate ABC transporter periplasmic ligand-binding protein ; K02051 sulfonate/nitrate/taurine transport system substrat | bid:Bind_3087         | - | - | + |
| dppA; periplasmic dipeptide transport protein (EC:3.1.3.26)                                                                         | ctu:ctu_20820         | - | - | + |
| hypothetical protein                                                                                                                | scl:sce1811           | - | - | + |
| hypothetical protein                                                                                                                | kpu:KPI_2188          | - | - | + |
| hypothetical protein                                                                                                                | cvi:CV_3738           | - | - | + |
| putative AraC-type regulatory protein                                                                                               | kpn:KPN_01600         | - | - | + |
| pyrG; CTP synthetase (EC:6.3.4.2); K01937 CTP synthase [EC:6.3.4.2]                                                                 | swd:Swoo_3351         | - | - | + |
| oxidoreductase, zinc-binding dehydrogenase family                                                                                   | kpe:KPK_2328          | - | - | + |
| dcuS; two-component system sensor kinase for C4-dicarboxylate regulation of anaerobic fumarate respiratory system ; K07701 tw       | kpu:KPI_2568          | - | - | + |
| putative peptidase ; K06016 N-carbamoyl-L-amino-acid hydrolase [EC:3.5.1.87]                                                        | kpu:KPI_1935          | - | - | + |
| putative 2-component transcriptional regulator                                                                                      | kpu:KPI_2619          | - | - | + |
| hypothetical protein                                                                                                                | ddi:DDBDRAFT_0190955  | - | - | + |
| hypothetical protein                                                                                                                | kpu:KPI_0271          | - | - | + |
| hypothetical protein                                                                                                                | kpu:KPI_4970          | - | - | + |
| hypothetical protein                                                                                                                | kpu:KPI_0323          | - | - | + |
| hypothetical protein                                                                                                                | kpu:KPI_2995          | - | - | + |
| hypothetical protein                                                                                                                | kpu:KPI_3926          | - | - | + |
| beta-adaptin (clathrin assembly protein complex 2 large beta chain), putative                                                       | cdu:CD36_13020        | - | - | + |
| hypothetical protein                                                                                                                | ptm:GSPATT00005598001 | - | - | + |
| hypothetical protein                                                                                                                | kpe:KPK_3074          | - | - | + |
| ygff; putative oxidoreductase                                                                                                       | kpu:KPI_4624          | - | - | + |
| hypothetical protein                                                                                                                | tet:THERM_00784720    | - | - | + |
| similar to HfES-AP                                                                                                                  | hmg:100213700         | - | - | + |
| hypothetical protein                                                                                                                | kpu:KPI_5248          | - | - | + |
| hypothetical protein                                                                                                                | kpu:KPI_2615          | - | - | + |
| hypothetical protein                                                                                                                | tet:THERM_00370670    | - | - | + |
| hypothetical protein                                                                                                                | kpu:KPI_1831          | - | - | + |
| hypothetical protein                                                                                                                | spq:SPAB_04017        | - | - | + |
| hypothetical protein ; K09780 hypothetical protein                                                                                  | kpu:KPI_3294          | - | - | + |
| yncA; hypothetical acetyltransferase ; K03823 phosphinothricin acetyltransferase [EC:2.3.1.183]                                     | kpu:KPI_2978          | - | - | + |
| hypothetical protein                                                                                                                | kpu:KPI_2471          | - | - | + |
| hypothetical protein                                                                                                                | pyo:PY04365           | - | - | + |
| histidine kinase                                                                                                                    | ank:AnaeK_2081        | - | - | + |
| putative transmembrane protein                                                                                                      | kpn:KPN_04510         | - | - | + |
| adenylsulfate kinase ; K00860 adenylsulfate kinase [EC:2.7.1.25]                                                                    | dvm:DvMF_0018         | - | - | + |
| nucleoid protein H-NS ; K03746 DNA-binding protein H-NS                                                                             | bvi:Bcep1808_7011     | - | - | + |
| pstA; putative Na <sup>+</sup> -dependent transporter ; K03453 bile acid:Na <sup>+</sup> symporter, BASS family                     | kpu:KPI_0262          | - | - | + |
| hemagglutination activity domain protein                                                                                            | ttu:TERTU_1697        | - | - | + |
| transcriptional regulator, Sir2 family protein                                                                                      | tva:TVAG_362260       | - | - | + |
| hypothetical protein                                                                                                                | kpu:KPI_3228          | - | - | + |
| glycosyl transferase, family 3-like protein                                                                                         | dde:Dd586_2440        | - | - | + |

<sup>a</sup>Features were detected in all three *K. variicola* genomes and all eight of the *K. pneumoniae* genomes to be counted as present (+) for that species.

<sup>b</sup>Predicted protein function of the top BLASTN hit of each feature to the KEGG database irrespective of the alignment length and e-value.

Supplemental Table 4. Features of *Klebsiella* sp. 10982 that were not identified in the genomes of the endosymbiont *Klebsiella* spp. or in the *K. pneumoniae* lineage

| Predicted protein <sup>a</sup>                                                                                          | Best KEGG match <sup>b</sup> | Best match length | % Identities | e-value   | Alignment length |
|-------------------------------------------------------------------------------------------------------------------------|------------------------------|-------------------|--------------|-----------|------------------|
| hypothetical protein                                                                                                    | eck:EC55989_2911             | 3852              | 93           | 0         | 1295             |
| hypothetical protein ; K01307 gamma-glutamyl hydrolase [EC:3.4.19.9]                                                    | tet:THERM_00130000           | 1698              | 100          | 3.1       | 21               |
| LysR-family transcriptional regulator                                                                                   | bav:BAV2502                  | 909               | 100          | 0.012     | 25               |
| hypothetical protein                                                                                                    | pag:PLES_15871               | 3381              | 90           | 1.00E-05  | 50               |
| lambda family phage tail tape measure protein                                                                           | ecm:EcSMS35_1198             | 3228              | 81           | 2.00E-19  | 225              |
| putative kinase                                                                                                         | kpn:KPN_01432                | 3087              | 90           | 3.00E-12  | 69               |
| pseudogene                                                                                                              | smd:Smed_6169                | 532               | 100          | 0.58      | 22               |
| hypothetical protein                                                                                                    | sme:SM_b21069                | 1419              | 100          | 0.036     | 24               |
| putative tail length tape measure protein                                                                               | eoh:ECO103_2072              | 2562              | 83           | 4.00E-14  | 136              |
| hypothetical protein LOC100251846                                                                                       | vvv:100251846                | 6282              | 100          | 0.56      | 22               |
| fdhA; formate dehydrogenase, alpha subunit ; K00123 formate dehydrogenase, alpha subunit [EC:1.2.1.2]                   | avi:Avi_4097                 | 2880              | 100          | 0.52      | 22               |
| beta-N-acetylhexosaminidase (EC:3.2.1.52); K12373 beta-hexosaminidase [EC:3.2.1.52]                                     | ent:Ent638_0442              | 2385              | 82           | 8.00E-71  | 485              |
| thiol-disulfide isomerase and thioredoxin                                                                               | xau:Xaut_3943                | 273               | 100          | 0.49      | 22               |
| hypothetical protein                                                                                                    | pth:PFHG_02360               | 8682              | 100          | 0.03      | 24               |
| G115923 gene product from transcript G115923-RA ; K00911 1D-myo-inositol-triphosphate 3-kinase [EC:2.7.1.127]           | dmo:Dmoj_G115923             | 1977              | 100          | 0.03      | 24               |
| non-specific protein-tyrosine kinase (EC:2.7.10.2); K00903 protein-tyrosine kinase [EC:2.7.10.-]                        | spe:Spro_1585                | 2175              | 86           | 3.00E-14  | 104              |
| ATPase                                                                                                                  | ppf:Pput_4620                | 2589              | 94           | 0.007     | 33               |
| AsmA family protein; K07290 hypothetical protein                                                                        | mei:Msp34_1055               | 2064              | 100          | 1.8       | 21               |
| hypothetical protein; K07459 putative ATP-dependent endonuclease of the OLD family                                      | aav:Aave_0676                | 2139              | 94           | 0.028     | 32               |
| hypothetical protein                                                                                                    | vvv:VVA1175                  | 3654              | 100          | 1.8       | 21               |
| hypothetical protein                                                                                                    | see:SNL254_A1133             | 2265              | 81           | 7.00E-43  | 380              |
| hypothetical protein                                                                                                    | sgl:SG1233                   | 1368              | 82           | 4.00E-20  | 182              |
| hypothetical protein ; K03497 chromosome partitioning protein, ParB family                                              | kpn:KPN_pKPN4p0711           | 2010              | 81           | 1.00E-53  | 494              |
| pdsA; 4-hydroxythreonine-4-phosphate dehydrogenase ; K00097 4-hydroxythreonine-4-phosphate dehydrogenase [EC:1.1.1.262] | ses:SARI_02913               | 990               | 100          | 0.41      | 22               |
| putative glycosyl transferase                                                                                           | stm:STM0726                  | 1896              | 78           | 1.00E-22  | 434              |
| putative protease/scaffold protein                                                                                      | eci:UTI89_C5120              | 2124              | 81           | 1.00E-50  | 417              |
| phage terminase large subunit (GpA)                                                                                     | ecx:EcHS_A2094               | 2127              | 84           | 1.00E-147 | 731              |
| transglycosylase SLT domain protein                                                                                     | kpe:KPK_4128                 | 1926              | 94           | 0         | 549              |
| RNA polymerase, sigma-24 subunit, ECF subfamily; K03088 RNA polymerase sigma-70 factor, ECF subfamily                   | hna:Hneap_1204               | 405               | 100          | 3.00E-11  | 39               |
| hypothetical protein                                                                                                    | spq:SPAB_02223               | 2082              | 84           | 5.00E-25  | 182              |
| hypothetical protein                                                                                                    | sgl:SG0823                   | 1770              | 97           | 2.00E-06  | 35               |
| hypothetical protein                                                                                                    | kpe:KPK_A0083                | 1863              | 84           | 7.00E-89  | 449              |
| uvrD; DNA helicase II (EC:3.6.1.-); K03657 DNA helicase II / ATP-dependent DNA helicase PerA [EC:3.6.1.-]               | cvi:CV_0205                  | 2142              | 92           | 0.002     | 38               |
| arsA; arsenical pump-driving ATPase (EC:3.6.3.16); K01551 arsenite-transporting ATPase [EC:3.6.3.16]                    | kpe:KPK_A0054                | 1752              | 87           | 3.00E-29  | 145              |
| mgo; malate:quinone oxidoreductase (EC:1.1.99.16); K00116 malate dehydrogenase (acceptor) [EC:1.1.99.16]                | abu:Abu_0518                 | 1359              | 100          | 1.4       | 21               |
| sodium/hydrogen exchanger ; K03455 monovalent cation:H+ antiporter-2, CPA2 family                                       | rpf:Rp1c12D_0617             | 1716              | 92           | 0         | 1415             |
| hypothetical protein                                                                                                    | bbr:BB3632                   | 1683              | 82           | 9.00E-05  | 104              |
| RSp1343; hypothetical protein                                                                                           | rso:RSO4767                  | 1167              | 96           | 0.35      | 26               |
| FlrB; two-component sensor kinase ; K10942 two-component system, sensor histidine kinase FlrB [EC:2.7.13.3]             | vfm:VFM11_1987               | 1062              | 100          | 1.4       | 21               |
| similar to uncharacterized conserved nucleotide binding protein found outside of yeast                                  | cal:CaO19_2043               | 903               | 100          | 0.34      | 22               |
| lambda family phage portal protein                                                                                      | ecx:EcHS_A2092               | 1575              | 83           | 1.00E-107 | 639              |
| IS66 family element, transposase                                                                                        | sbc:SbBS512_A0193            | 1539              | 93           | 0         | 1539             |
| hypothetical protein                                                                                                    | ecv:APECO1_O1CoBM79          | 1566              | 93           | 0         | 1566             |
| hypothetical protein                                                                                                    | ecc:c3645                    | 1539              | 89           | 0         | 1540             |
| recombinase                                                                                                             | rsh:RspH17029_3501           | 1572              | 88           | 0.08      | 43               |
| ADP-L-glycero-D-mannoheptose-6-epimerase (EC:5.1.3.20); K03274 ADP-L-glycero-D-manno-heptose 6-epimerase [EC:5.1.3.20]  | nis:NIS_1449                 | 996               | 100          | 0.32      | 22               |
| hypothetical protein                                                                                                    | sdv:SDY_1922                 | 663               | 86           | 1.00E-12  | 93               |
| pseudogene                                                                                                              | cro:ROD_05881                | 1518              | 79           | 5.00E-31  | 452              |
| gp29; hypothetical protein                                                                                              | bpt:Bpet4408                 | 1476              | 83           | 5.00E-06  | 98               |
| putative phage tail sheath protein                                                                                      | cro:ROD_25901                | 1503              | 82           | 4.00E-25  | 226              |
| putative portal protein (head-tail preconnector protein) from putative prophage                                         | ecf:EC55989_1707             | 1581              | 83           | 2.00E-33  | 232              |
| ycgE; putative kinase                                                                                                   | eum:ECUMN_3103               | 1479              | 82           | 0         | 1257             |
| hypothetical protein                                                                                                    | net:Net_2620                 | 1593              | 100          | 4.8       | 20               |
| hypothetical protein LOC100280317                                                                                       | zma:100280317                | 1260              | 100          | 0.31      | 22               |
| hypothetical protein                                                                                                    | ses:SARI_00371               | 2472              | 81           | 1.00E-169 | 1191             |
| hypothetical protein                                                                                                    | cko:CKO_04128                | 1455              | 85           | 0         | 1241             |
| hypothetical protein ; K02433 aspartyl-tRNA(Asn)/glutamyl-tRNA (Gln) amidotransferase subunit A [EC:6.3.5.6 6.3.5.7]    | rlt:Rleg2_5792               | 1371              | 84           | 0.005     | 73               |
| polysaccharide biosynthesis protein                                                                                     | kpn:KPN_02500                | 1503              | 94           | 0.019     | 32               |
| ATP-dependent DNA helicase Rep (EC:3.6.1.-); K03656 ATP-dependent DNA helicase Rep [EC:3.6.1.-]                         | dar:Daro_3879                | 1992              | 100          | 0.074     | 23               |
| hypothetical protein                                                                                                    | ecx:EcHS_A2088               | 387               | 85           | 3.00E-10  | 93               |
| putative sugar transport-related, membrane protein                                                                      | pfS:PFLU1074                 | 1341              | 84           | 2.00E-17  | 137              |
| NADH dehydrogenase subunit G (EC:1.6.5.3); K00336 NADH dehydrogenase I subunit G [EC:1.6.5.3]                           | rpH:RPB_1352                 | 2619              | 100          | 1.1       | 21               |
| tyrosine phenol-lyase ; K01668 tyrosine phenol-lyase [EC:4.1.99.2]                                                      | cko:CKO_03467                | 1398              | 85           | 0         | 1367             |
| hypothetical protein ; K08195 MFS transporter, AAHS family, 4-hydroxybenzoate transporter                               | cko:CKO_00650                | 1428              | 83           | 2.00E-85  | 515              |
| nrpR; transcriptional regulator NrpR; K07738 transcriptional repressor NrdR                                             | asa:ASA_0978                 | 450               | 100          | 0.28      | 22               |
| pseudogene                                                                                                              | ecm:EcSMS35_1112             | 644               | 88           | 4.00E-28  | 131              |
| tolA; cell envelope integrity inner membrane protein TolA ; K03646 colicin import membrane protein                      | kpe:KPK_3827                 | 1338              | 98           | 0         | 609              |
| argO; arginine exporter                                                                                                 | cro:ROD_50761                | 636               | 100          | 0.28      | 22               |
| protein HipA ; K07154                                                                                                   | sea:SeAg_B4814               | 1329              | 83           | 3.00E-38  | 260              |
| ycgS; putative transporter                                                                                              | ecq:ECED1_3220               | 1338              | 81           | 4.00E-74  | 596              |
| HK97 family phage portal protein                                                                                        | ppu:PP_1565                  | 1296              | 84           | 0.069     | 63               |
| hypothetical protein                                                                                                    | app:CAP2UW1_3394             | 1131              | 96           | 0.068     | 27               |
| hypothetical protein                                                                                                    | cko:CKO_04131                | 1299              | 84           | 0         | 1205             |
| hypothetical protein ; K00313 electron transfer flavoprotein-quinone oxidoreductase [EC:1.5.5.-]                        | cko:CKO_04121                | 1272              | 82           | 2.00E-30  | 239              |
| hypothetical protein                                                                                                    | ecv:APECO1_1183              | 1284              | 80           | 2.00E-60  | 629              |
| hypothetical protein                                                                                                    | ptm:GSPATT00023598001        | 2052              | 96           | 0.26      | 26               |
| hypothetical protein                                                                                                    | cko:CKO_03466                | 1263              | 83           | 1.00E-95  | 544              |
| glutamine amidotransferase class-II                                                                                     | mei:Msp34_2423               | 897               | 100          | 4.1       | 20               |
| int; bacteriophage integrase                                                                                            | stt:t4371                    | 1260              | 94           | 0         | 1250             |
| hypothetical protein                                                                                                    | etr:ETAE_1077                | 348               | 100          | 0.26      | 22               |
| hypothetical protein                                                                                                    | pna:Pnap_4211                | 882               | 100          | 1         | 21               |
| tnpA; IS256 family transposase                                                                                          | asa:ASA_P5G090               | 1215              | 94           | 0         | 1215             |
| similar to conserved hypothetical protein                                                                               | api:100165219                | 1212              | 96           | 0.064     | 27               |
| hypothetical protein                                                                                                    | tps:THAPSDRAFT_1280          | 2829              | 100          | 0.99      | 21               |
| major head protein                                                                                                      | pag:PLES_25421               | 1188              | 81           | 2.00E-05  | 113              |
| gpF; F protein (gpF) (protein GP30)                                                                                     | bpt:Bpet4409                 | 795               | 87           | 0.016     | 52               |
| Os01g0148000, hypothetical protein                                                                                      | osa:4325212                  | 5943              | 96           | 0.25      | 26               |
| transposase mutator type                                                                                                | dda:Dd703_3078               | 1203              | 88           | 0         | 1203             |
| peptidase S8 and S53, subtilisin, kexin, sedolisin                                                                      | shn:Shewana3_2745            | 1566              | 100          | 0.063     | 23               |
| hypothetical protein                                                                                                    | ptm:GSPATT00030850001        | 4875              | 100          | 0.001     | 26               |
| putative N-hydroxybenzoate hydroxylase                                                                                  | cro:ROD_22631                | 1194              | 84           | 0         | 1116             |
| hypothetical protein ; K02055 putative spermidine/putrescine transport system substrate-binding protein                 | pfl:PFL_1368                 | 1209              | 90           | 1.00E-18  | 83               |
| putative transmembrane transport protein                                                                                | stt:t0584                    | 1191              | 83           | 7.00E-48  | 308              |
| dynein heavy chain                                                                                                      | pkn:PKH_070250               | 17334             | 100          | 0.96      | 21               |
| putative outer membrane protein                                                                                         | sml:Smlt0614                 | 876               | 100          | 0.016     | 24               |
| multidrug efflux system protein MdtL; K08163 MFS transporter, DHA1 family, multidrug resistance protein                 | asa:ASA_1192                 | 1173              | 89           | 0         | 1156             |
| putative prophage DNA-binding protein                                                                                   | cro:ROD_09401                | 1158              | 84           | 1.00E-110 | 601              |
| hypothetical protein                                                                                                    | sdl:Sdel_1779                | 870               | 96           | 0.061     | 27               |
| yjfc; hypothetical protein                                                                                              | set:SEN4142                  | 1164              | 81           | 3.00E-81  | 714              |

|                                                                                                                                    |                       |        |     |           |      |
|------------------------------------------------------------------------------------------------------------------------------------|-----------------------|--------|-----|-----------|------|
| hypothetical protein                                                                                                               | spq:SPAB_02226        | 1152   | 82  | 6.00E-45  | 331  |
| putative trypsin-like serine protease                                                                                              | bmj:BMULJ_00932       | 1152   | 92  | 0         | 946  |
| putative baseplate J protein                                                                                                       | ecx:EcHS_A2084        | 1149   | 95  | 0         | 878  |
| iron-containing alcohol dehydrogenase                                                                                              | dze:Ddl1591_2599      | 1149   | 89  | 4.00E-06  | 54   |
| hypothetical protein                                                                                                               | rfp:Rpic12D_0619      | 1146   | 98  | 0         | 1146 |
| filamentation induced by cAMP protein Fic                                                                                          | pwa:Pecwa_0711        | 1143   | 88  | 0         | 1143 |
| bacteriophage lambda NinG family protein                                                                                           | ent:Ent638_1024       | 621    | 100 | 0.92      | 21   |
| hypothetical protein                                                                                                               | isc:IscW_ISCW023246   | 3612   | 96  | 0.23      | 26   |
| glycogen/starch synthase, ADP-glucose type (EC:2.4.1.21); K00703 starch synthase [EC:2.4.1.21]                                     | gem:GM21_3463         | 1461   | 100 | 0.9       | 21   |
| hypothetical protein                                                                                                               | ecg:E2348C_2761       | 423    | 86  | 6.00E-39  | 193  |
| two-component hybrid sensor and regulator                                                                                          | dma:DMR_36660         | 3036   | 100 | 0.88      | 21   |
| bacteriophage Mu P protein                                                                                                         | ecx:EcHS_A2087        | 1086   | 83  | 4.00E-43  | 284  |
| ampC; beta-lactamase (EC:3.5.2.6); K01467 beta-lactamase [EC:3.5.2.6]                                                              | asa:ASA_1191          | 1233   | 88  | 0         | 796  |
| hypothetical protein                                                                                                               | ptm:GSPAT100027860001 | 3759   | 94  | 0.004     | 33   |
| phospholipase/carboxylesterase                                                                                                     | hap:HAPS_1871         | 1347   | 100 | 0.22      | 22   |
| SF4520                                                                                                                             | sf:SF4520             | 359926 | 98  | 3.00E-16  | 51   |
| hypothetical protein                                                                                                               | ecg:E2348C_2761       | 423    | 84  | 9.00E-41  | 244  |
| putative phage capsid protein                                                                                                      | cro:ROD_25951         | 1050   | 84  | 1.00E-70  | 398  |
| hypothetical protein                                                                                                               | eci:UTI89_C5110       | 1053   | 79  | 1.00E-21  | 420  |
| SLC7A3; solute carrier family 7 (cationic amino acid transporter, y+ system), member 3                                             | gga:422213            | 1893   | 100 | 0.055     | 23   |
| hypothetical protein; K09778 hypothetical protein                                                                                  | rak:A1C_00645         | 657    | 100 | 3.4       | 20   |
| cell division protease FtsH-like protein                                                                                           | abb:ABBFA_002565      | 942    | 92  | 9.00E-04  | 38   |
| putative gentisate 1,2-dioxygenase                                                                                                 | cro:ROD_22661         | 1038   | 85  | 0         | 827  |
| yjhK; putative phosphodiesterase                                                                                                   | cta:ETA_33870         | 1995   | 100 | 0.84      | 21   |
| hypothetical protein                                                                                                               | sme:Sma1162           | 678    | 100 | 0.83      | 21   |
| putative transposase, IS110 family                                                                                                 | etc:NT01E1_2733       | 1095   | 85  | 0         | 971  |
| CobW/P47K family protein                                                                                                           | efe:EFER_2149         | 1026   | 95  | 0         | 1018 |
| putative bacteriophage protein                                                                                                     | kpe:KPK_1556          | 978    | 97  | 0.003     | 29   |
| hypothetical protein                                                                                                               | sec:SC2593            | 1032   | 91  | 3.00E-25  | 94   |
| hypothetical protein                                                                                                               | cko:CKO_04246         | 1428   | 91  | 0         | 943  |
| GntR family transcriptional regulator                                                                                              | ent:Ent638_4311       | 1020   | 82  | 1.00E-21  | 196  |
| putative tail protein                                                                                                              | psp:PSPPH_3936        | 1002   | 82  | 0.003     | 89   |
| binding-protein-dependent transport systems inner membrane component ; K10228 sorbitol/mannitol transport system permease protein  | ppg:PputGB1_1748      | 1695   | 96  | 0.052     | 27   |
| pseudogene                                                                                                                         | rlg:Rleg_3751         | 882    | 100 | 0.81      | 21   |
| hypothetical protein                                                                                                               | ecx:EC888_2766        | 333    | 88  | 1.00E-27  | 126  |
| yihM; hypothetical protein                                                                                                         | ecv:APECO1_1182       | 1050   | 86  | 2.00E-16  | 107  |
| SORBDRAFT_03g010040; hypothetical protein ; K12619 5'-3' exoribonuclease 2 [EC:3.1.13.-]                                           | sfv:SFV_3627          | 981    | 86  | 1.00E-05  | 65   |
| sodium/hydrogen exchanger ; K03316 monovalent cation:H+ antiporter, CPA1 family                                                    | sbi:SORBI_03g010040   | 3201   | 100 | 0.2       | 22   |
| putative fimbrial adhesin precursor                                                                                                | shl:Shal_1106         | 1287   | 96  | 0.013     | 28   |
| ksgA; dimethyladenosine transferase (EC:2.1.1.-); K02528 dimethyladenosine transferase [EC:2.1.1.-]                                | kpu:KPI_0601          | 954    | 83  | 3.00E-06  | 90   |
| LysR family transcriptional regulator                                                                                              | las:CLIBASIA_01415    | 855    | 96  | 0.2       | 26   |
| serA2; D-3-phosphoglycerate dehydrogenase (EC:1.1.1.95)                                                                            | asa:ASA_1193          | 963    | 90  | 0         | 959  |
| putative transmembrane protein                                                                                                     | bpt:Bpet0409          | 924    | 90  | 0.003     | 41   |
| cation diffusion facilitator family transporter ; K03295 cation efflux system protein, CDF family                                  | bgl:lglu_2g11640      | 1371   | 100 | 0.78      | 21   |
| transcriptional regulator, LysR family                                                                                             | sfr:Sfr_3473          | 960    | 99  | 0         | 960  |
| hypothetical protein                                                                                                               | ddc:Dd586_2850        | 963    | 81  | 2.00E-04  | 119  |
| hypothetical protein                                                                                                               | kpu:KPI_2402          | 1923   | 86  | 1.00E-134 | 556  |
| Pe06g01390                                                                                                                         | kpe:KPK_4115          | 2532   | 87  | 1.00E-11  | 83   |
| hypothetical protein                                                                                                               | pes:Pe06g01390        | 1206   | 100 | 0.19      | 22   |
| PIKB                                                                                                                               | cvi:CV_2155           | 993    | 93  | 6.00E-20  | 73   |
| probable ring-cleaving dioxygenase PA0817; K06991                                                                                  | pol:Bpro_5091         | 930    | 93  | 5.00E-05  | 40   |
| hypothetical protein                                                                                                               | atc:AGR_pAT_700       | 414    | 100 | 0.012     | 24   |
| hypothetical protein                                                                                                               | cvi:CV_2155           | 993    | 85  | 2.00E-16  | 115  |
| similar to CG8597-PA, isoform A; K13187 RNA-binding protein 4                                                                      | ecc:c5175             | 132    | 96  | 3.00E-12  | 48   |
| hypothetical protein                                                                                                               | tea:659335            | 1077   | 100 | 0.75      | 21   |
| glycosyl transferase, group 2 family protein; K12992 rhamnosyltransferase [EC:2.4.1.-]                                             | ses:SARI_02599        | 2298   | 85  | 1.00E-61  | 307  |
| IS4orf                                                                                                                             | ecx:EcHS_A2189        | 912    | 79  | 2.00E-07  | 224  |
| hypothetical protein                                                                                                               | ssn:SSON_4044         | 1347   | 89  | 0         | 891  |
| membrane protein-like protein                                                                                                      | rfp:Rpic12D_0622      | 915    | 97  | 0         | 915  |
| hypothetical protein                                                                                                               | ajs:Ajs_1869          | 600    | 100 | 0.74      | 21   |
| putative transcriptional regulator                                                                                                 | ecy:ECSE_1688         | 1221   | 81  | 3.00E-25  | 282  |
| hypothetical protein                                                                                                               | cro:ROD_22681         | 909    | 81  | 1.00E-103 | 769  |
| transcription regulator protein                                                                                                    | pcb:PC000059.03.0     | 2331   | 96  | 0.73      | 25   |
| cyclic nucleotide-binding domain containing protein                                                                                | rso:RS00144           | 966    | 82  | 1.00E-11  | 135  |
| intA; integrase                                                                                                                    | tet:THERM_00686210    | 3255   | 100 | 2.9       | 20   |
| ParB family protein; K03497 chromosome partitioning protein, ParB family                                                           | eck:EC5989_2909       | 1242   | 94  | 0         | 897  |
| putative DNA binding protein                                                                                                       | ypl:YpsiP31758_0771   | 891    | 89  | 7.00E-04  | 46   |
| hypothetical protein                                                                                                               | cro:ROD_20691         | 888    | 90  | 0         | 888  |
| ZNF275; zinc finger protein 275; K09228 KRAB domain-containing zinc finger protein                                                 | mfa:Mfa_1164          | 888    | 96  | 0         | 888  |
| putative integrase ; K07497 putative transposase                                                                                   | mec:695012            | 1035   | 100 | 0.18      | 22   |
| polysaccharide deacetylase family protein                                                                                          | stm:STM0947           | 684    | 92  | 0         | 672  |
| hypothetical protein                                                                                                               | pfl:PFL_1362          | 882    | 84  | 3.00E-77  | 437  |
| protein with unknown function                                                                                                      | ses:SARI_00611        | 879    | 83  | 3.00E-09  | 107  |
| hypothetical protein                                                                                                               | rcu:RCOM_0118640      | 2226   | 100 | 0.71      | 21   |
| S49 family peptidase                                                                                                               | kpu:KPI_4467          | 912    | 93  | 0         | 659  |
| hypothetical protein                                                                                                               | ecx:EcHS_A2091        | 867    | 91  | 9.00E-56  | 177  |
| GK12957 gene product from transcript GK12957-RA                                                                                    | ddi:DBBDRAFT_0167273  | 1182   | 100 | 0.045     | 23   |
| hypothetical protein                                                                                                               | dwi:Dwil_GK12957      | 1551   | 100 | 0.7       | 21   |
| 5-carboxymethyl-2-hydroxyruconate delta-isomerase (EC:5.3.3.10)                                                                    | cko:CKO_04125         | 855    | 82  | 9.00E-25  | 217  |
| phage lysis protein, endopeptidase                                                                                                 | dze:Ddl1591_2323      | 885    | 92  | 2.00E-19  | 76   |
| hypothetical protein, probable fragment                                                                                            | hde:HDEF_1455         | 498    | 100 | 0.68      | 21   |
| hypothetical protein ; K07088                                                                                                      | eta:ETA_18660         | 261    | 88  | 4.00E-05  | 56   |
| microcystin LR degradation protein MlrC-like protein                                                                               | dde:Dde_0880          | 954    | 96  | 0.66      | 25   |
| hypothetical protein                                                                                                               | met:M446_0874         | 1464   | 100 | 0.17      | 22   |
| hypothetical protein                                                                                                               | las:CLIBASIA_05532    | 1026   | 100 | 0.66      | 21   |
| GE16755 gene product from transcript GE16755-RA                                                                                    | hpg:HPG27_669         | 627    | 100 | 0.042     | 23   |
| deoxyguanosinetriphosphate triphosphohydrolase, putative (EC:3.1.5.1); K01129 dGTPase [EC:3.1.5.1]                                 | dya:Dyak_GE16755      | 9507   | 96  | 0.17      | 26   |
| yihN; putative resistance protein                                                                                                  | etc:NT01E1_3100       | 1530   | 96  | 0.16      | 26   |
| short chain dehydrogenase/reductase family oxidoreductase                                                                          | sfv:SFV_3626          | 1059   | 81  | 5.00E-51  | 437  |
| hypothetical protein                                                                                                               | kpu:KPI_1537          | 798    | 86  | 2.00E-34  | 173  |
| hypothetical protein                                                                                                               | eko:CKO_04130         | 786    | 84  | 1.00E-159 | 786  |
| GP23                                                                                                                               | cko:CKO_04126         | 783    | 83  | 8.00E-19  | 155  |
| rplI; ribosomal protein L9; K02939 large subunit ribosomal protein L9                                                              | sew:SeSa_A0683        | 804    | 84  | 2.00E-13  | 122  |
| fabG; short chain dehydrogenase/reductase family oxidoreductase ; K00059 3-oxoacyl-[acyl-carrier protein] reductase [EC:1.1.1.100] | asa:ASA_0709          | 447    | 100 | 0.63      | 21   |
| putative bacteriophage protein                                                                                                     | pfl:PFL_1364          | 762    | 80  | 3.00E-15  | 213  |
| RNA polymerase, sigma 70 subunit, RpoD ; K03086 RNA polymerase primary sigma factor                                                | ent:Ent638_0818       | 681    | 92  | 0.003     | 37   |
| dam; putative prophage DNA adenine methylase                                                                                       | vap:Vapar_1762        | 2265   | 100 | 2.5       | 20   |
| hypothetical protein                                                                                                               | cro:ROD_09331         | 771    | 82  | 3.00E-52  | 399  |
| putative ABC transporter                                                                                                           | kpe:KPK_4162          | 933    | 93  | 5.00E-29  | 92   |
| Ead domain protein                                                                                                                 | dma:DMR_44170         | 2541   | 100 | 0.039     | 23   |
| triphosphoribosyl-dephospho-CoA synthase Ctg (EC:2.7.8.25); K05966 triphosphoribosyl-dephospho-CoA synthase [EC:2.7.8.25]          | kpe:KPK_4165          | 666    | 96  | 3.00E-95  | 215  |
|                                                                                                                                    | dze:Ddl1591_2317      | 909    | 89  | 4.00E-08  | 61   |

|                                                                                                                                        |                       |      |     |           |     |
|----------------------------------------------------------------------------------------------------------------------------------------|-----------------------|------|-----|-----------|-----|
| oxidoreductase, short chain dehydrogenase/reductase family                                                                             |                       |      |     |           |     |
| hypothetical protein                                                                                                                   | pst:PSPTO_4200        | 750  | 83  | 3.00E-12  | 128 |
| plasmid SOS inhibition protein A                                                                                                       | nve:NEMVE_v1g61906    | 810  | 100 | 0.59      | 21  |
| hypothetical protein                                                                                                                   | kpn:KPN_pKPN4p07114   | 723  | 89  | 5.00E-23  | 106 |
| putative transport periplasmic protein ; K02035 peptide/nickel transport system substrate-binding protein                              | ecg:E2348C_2638       | 711  | 87  | 6.00E-07  | 67  |
| yihL; putative DNA-binding transcriptional regulator                                                                                   | sdv:SDY_1409          | 1635 | 100 | 0.58      | 21  |
| c2; P22 repressor protein C2                                                                                                           | eoh:ECO103_4299       | 711  | 82  | 3.00E-21  | 191 |
| bepA; hypothetical protein                                                                                                             | seh:SeHA_C0382        | 651  | 94  | 2.00E-04  | 35  |
| glutamine amidotransferase ; K01951 GMP synthase (glutamine-hydrolysing) [EC:6.3.5.2]                                                  | btr:Btr_1700          | 1635 | 100 | 2.3       | 20  |
| head maturation protease, putative ; K06904                                                                                            | eko:CKO_00370         | 717  | 91  | 6.00E-07  | 47  |
| putative tail component of cryptic prophage CP-933P                                                                                    | ppu:PP_1566           | 702  | 84  | 1.00E-05  | 77  |
| hypothetical protein                                                                                                                   | etw:ECSP_2099         | 717  | 94  | 4.00E-11  | 50  |
| yjJ; putative phage shock protein A                                                                                                    | eko:CKO_00652         | 702  | 88  | 1.00E-120 | 413 |
| putative phage repressor protein C1                                                                                                    | stm:STM4371           | 699  | 91  | 7.00E-13  | 65  |
| peptidase M48 Ste24p ; K03799 heat shock protein HtpX [EC:3.4.24.-]                                                                    | eoj:ECO26_3204        | 651  | 97  | 0.002     | 29  |
| hypothetical protein ; K00782 hypothetical protein                                                                                     | rpf:Rpic12D_0615      | 966  | 95  | 0         | 696 |
| FtsH-2 peptidase (EC:3.6.4.6); K03798 cell division protease FtsH [EC:3.4.24.-]                                                        | eko:CKO_04247         | 696  | 88  | 0         | 697 |
| Ig domain protein, group 2 domain protein                                                                                              | dde:Dde_3415          | 1884 | 86  | 1.00E-161 | 622 |
| FAD linked oxidase domain protein ; K06911                                                                                             | vfm:VFMJ1_A0011       | 3585 | 100 | 0.55      | 21  |
| similar to ubiquitin-conjugating enzyme UbcM3; K06689 ubiquitin-conjugating enzyme E2 D/E [EC:6.3.2.19]                                | geo:Geob_0863         | 2913 | 100 | 0.14      | 22  |
| C1; bacteriophage 186 repressor protein C1                                                                                             | cin:100185453         | 756  | 100 | 0.14      | 22  |
| GSV1VT00003057001; hypothetical protein LOC100259015                                                                                   | eta:ETA_05540         | 579  | 82  | 2.00E-06  | 102 |
| LppC family lipoprotein ; K07121                                                                                                       | vvi:100259015         | 450  | 100 | 0.54      | 21  |
| yjK; hypothetical protein                                                                                                              | swd:Swo_0352          | 1905 | 100 | 0.53      | 21  |
| putative bacteriophage protein                                                                                                         | sbo:SBO_4272          | 660  | 83  | 2.00E-10  | 117 |
| RND efflux transporter                                                                                                                 | ptm:GSPATT00016606001 | 1392 | 100 | 0.53      | 21  |
| 3-ketoacyl-CoA thiolase (EC:2.3.1.16 2.3.1.9)                                                                                          | stt:t1873             | 756  | 83  | 3.00E-36  | 260 |
| GntR-family transcriptional regulator                                                                                                  | mpt:Mpe_B0595         | 2421 | 100 | 0.53      | 21  |
| putative inner membrane protein                                                                                                        | vex:VEA_001989        | 1176 | 100 | 0.13      | 22  |
| glutathione-S-transferase-family protein                                                                                               | pmr:PMI0404           | 651  | 82  | 1.00E-35  | 275 |
| hypothetical protein                                                                                                                   | sea:SeAg_B4652        | 639  | 81  | 6.00E-07  | 135 |
| hypothetical protein                                                                                                                   | stt:0679              | 645  | 84  | 2.00E-62  | 372 |
| fumarate/tartrate hydratase, alpha subunit ; K01677 fumarate hydratase subunit alpha [EC:4.2.1.2]                                      | bmj:BMULJ_00938       | 612  | 99  | 0         | 597 |
| hypothetical protein                                                                                                                   | ecx:EcHS_A2097        | 525  | 95  | 0         | 419 |
| BcepMu22; putative soluble lytic murein transglycosylase                                                                               | sun:SUN_0573          | 852  | 100 | 2         | 20  |
| transcriptional regulator, LuxR family                                                                                                 | kpe:KPK_4144          | 486  | 97  | 9.00E-46  | 108 |
| cobyrinic acid a,c-diamide synthase ; K03496 chromosome partitioning protein                                                           | bj:BCAS0533           | 612  | 97  | 5.00E-07  | 35  |
| helicase C2                                                                                                                            | kpe:KPK_2813          | 630  | 86  | 8.00E-37  | 189 |
| rap, ninG; structure-specific endonuclease                                                                                             | ent:Ent638_4322       | 642  | 79  | 3.00E-36  | 548 |
| DNA polymerase III subunits gamma and tau (EC:2.7.7.7); K02343 DNA polymerase III subunit gamma/tau [EC:2.7.7.7]                       | ajs:Ajs_2428          | 2568 | 100 | 0.13      | 22  |
| hypothetical protein                                                                                                                   | ecd:ECDH10B_1336      | 642  | 86  | 1.00E-66  | 291 |
| hypothetical protein                                                                                                                   | bur:Bcep18194_A5128   | 2376 | 100 | 0.5       | 21  |
| resolvase                                                                                                                              | cro:ROD_09421         | 612  | 85  | 1.00E-94  | 446 |
| hypothetical protein                                                                                                                   | msu:MS0416            | 744  | 100 | 0.031     | 23  |
| Ead domain protein                                                                                                                     | eta:ETA_pET460080     | 606  | 99  | 0         | 606 |
| putative lipoprotein                                                                                                                   | ncr:NCU00739          | 372  | 100 | 0.48      | 21  |
| bacteriophage Mu GP45 protein                                                                                                          | kpe:KPK_4165          | 666  | 91  | 7.00E-31  | 111 |
| hypothetical protein                                                                                                                   | ses:SAR1_02830        | 606  | 97  | 0.002     | 29  |
| similar to zinc finger protein 544                                                                                                     | kpe:KPK_3060          | 528  | 96  | 1.00E-120 | 266 |
| hypothetical protein                                                                                                                   | ecx:EcHS_A2086        | 582  | 87  | 5.00E-07  | 67  |
| hypothetical protein ; K02443 glycerol uptake operon antiterminator                                                                    | kpn:KPN_pKPN5p08207   | 582  | 91  | 0.03      | 35  |
| hypothetical protein                                                                                                                   | drc:798256            | 903  | 100 | 0.47      | 21  |
| hypothetical protein                                                                                                                   | ecx:EcHS_A2090        | 591  | 86  | 8.00E-49  | 237 |
| exonuclease (EC:3.1.11.-); K03546 exonuclease SbcC                                                                                     | eko:CKO_04123         | 576  | 85  | 1.00E-81  | 404 |
| rrmJ; ribosomal RNA large subunit methyltransferase J ; K02427 ribosomal RNA large subunit methyltransferase E [EC:2.1.1.-]            | kpu:KPI_3654          | 576  | 86  | 6.00E-25  | 137 |
| groEL; chaperonin GroEL ; K04077 chaperonin GroEL                                                                                      | ptm:GSPATT00017241001 | 3924 | 100 | 0.12      | 22  |
| GK25249 gene product from transcript GK25249-RA                                                                                        | sat:SYN_00200         | 3672 | 100 | 0.46      | 21  |
| putative glycosyl hydrolase, BNR repeat (EC:3.2.1.21)                                                                                  | bmr:BM1_I1681         | 648  | 100 | 0.12      | 22  |
| 3'-5' exoribonuclease ; K12573 ribonuclease R [EC:3.1.-.-]                                                                             | slo:Shew_0472         | 1650 | 100 | 0.11      | 22  |
| hypothetical protein                                                                                                                   | dwi:Dwil_GK25249      | 3474 | 100 | 0.45      | 21  |
| cyclic beta-1,2-glucan synthase                                                                                                        | cti:RALTA_B2028       | 1158 | 100 | 0.45      | 21  |
| GGDEF domain                                                                                                                           | azc:AZC_1859          | 2445 | 96  | 0.45      | 25  |
| hypothetical protein                                                                                                                   | esa:ESA_00997         | 741  | 95  | 2.00E-06  | 38  |
| hypothetical protein                                                                                                                   | asa:ASA_3213          | 8511 | 100 | 0.11      | 22  |
| thisS; thiamine biosynthesis protein ThiS ; K03154 thiamine biosynthesis ThiS                                                          | oca:OCAR_4736         | 2292 | 96  | 0.028     | 27  |
| protein tyrosine phosphatase ; K03741 arsenate reductase [EC:1.20.4.1]                                                                 | lbc:LACBIDRAFT_298451 | 2841 | 91  | 0.44      | 33  |
| capsule polysaccharide export protein KpsC                                                                                             | cro:ROD_25921         | 546  | 80  | 1.00E-07  | 168 |
| Na(+)-translocating NADH:quinone reductase subunit A ; K00346 Na(+)-transporting NADH:ubiquinone oxidoreductase subunit A [EC:1.6.5.-] | cjr:CJE1191           | 192  | 100 | 0.44      | 21  |
| yrfC; hypothetical protein ; K12289 pilus assembly protein HoFN                                                                        | rfr:Rfr_3666          | 483  | 94  | 5.00E-13  | 53  |
| hypothetical protein                                                                                                                   | cjd:JJD26997_0547     | 792  | 100 | 0.43      | 21  |
| sodium dicarboxylate symporter                                                                                                         | fph:Fph1_1180         | 975  | 100 | 1.7       | 20  |
| cytochrome-c peroxidase (EC:1.11.1.5); K00428 cytochrome c peroxidase [EC:1.11.1.5]                                                    | sdn:Sdn_0982          | 1335 | 96  | 1.7       | 24  |
| hypothetical protein                                                                                                                   | kpn:KPN_03765         | 534  | 89  | 1.00E-108 | 353 |
| putative prophage DNA-binding protein                                                                                                  | ent:Ent638_0796       | 546  | 87  | 1.00E-13  | 90  |
| hypothetical protein                                                                                                                   | dar:Daro_0480         | 1302 | 100 | 1.7       | 20  |
| fimbrial protein ; K07345 major type 1 subunit fimbrin (pilin)                                                                         | msl:Msil_3903         | 930  | 94  | 0.002     | 33  |
| alpha-hemolysin translocation ATP-binding protein HlyB; K11004 ATP-binding cassette, subfamily B, bacterial HlyB/CyaB                  | eck:EC55989_2618      | 480  | 93  | 2.00E-71  | 195 |
| hypothetical protein                                                                                                                   | cro:ROD_26201         | 558  | 83  | 4.00E-26  | 191 |
| U3 snoRNP-associated protein Utp16 (predicted)                                                                                         | pyo:PYO1292           | 7761 | 100 | 0.1       | 22  |
| GD12212 gene product from transcript GD12212-RA                                                                                        | kpu:KPI_0597          | 513  | 81  | 8.00E-21  | 230 |
| hypothetical protein                                                                                                                   | ecp:ECP_4554          | 2124 | 100 | 1.6       | 20  |
| hypothetical protein                                                                                                                   | spq:SPAB_05418        | 495  | 90  | 7.00E-06  | 49  |
| similar to ankryrin repeat domain 5                                                                                                    | nve:NEMVE_v1g173914   | 3165 | 93  | 0.4       | 29  |
| Na(+)-translocating NADH:quinone reductase subunit A ; K00346 Na(+)-transporting NADH:ubiquinone oxidoreductase subunit A [EC:1.6.5.-] | spo:SPBP8B7_10c       | 1041 | 100 | 0.4       | 21  |
| yhhY; putative acyltransferase ; K03825 putative acetyltransferase [EC:2.3.1.-]                                                        | dsl:Dsim_GD12212      | 1260 | 96  | 0.4       | 25  |
| hypothetical protein                                                                                                                   | pan:PODANSg8044       | 1542 | 96  | 0.1       | 26  |
| hypothetical protein                                                                                                                   | ecx:EcHS_A2095        | 564  | 89  | 1.00E-53  | 193 |
| similar to ankryrin repeat domain 5                                                                                                    | tgw:100219020         | 2394 | 100 | 0.1       | 22  |
| Na(+)-translocating NADH:quinone reductase subunit A ; K00346 Na(+)-transporting NADH:ubiquinone oxidoreductase subunit A [EC:1.6.5.-] | dps:DP1802            | 1338 | 96  | 0.1       | 26  |
| yhhY; putative acyltransferase ; K03825 putative acetyltransferase [EC:2.3.1.-]                                                        | kpu:KPI_5140          | 489  | 87  | 2.00E-46  | 201 |
| hypothetical protein                                                                                                                   | cgr:CAGL0A00913g      | 4281 | 96  | 0.025     | 27  |
| hypothetical protein                                                                                                                   | ecw:EcE24377A_1452    | 540  | 92  | 0.002     | 37  |
| putative tail component of prophage CP-933K                                                                                            | sfx:S0748             | 741  | 90  | 0.025     | 39  |
| magnesium transporter ; K06213 magnesium transporter                                                                                   | dol:Dole_0412         | 1386 | 100 | 0.38      | 21  |
| recB; exodeoxyribonuclease V, beta subunit (EC:3.1.11.5); K03582 exodeoxyribonuclease V beta subunit [EC:3.1.11.5]                     | mca:MCA0691           | 3603 | 100 | 0.38      | 21  |
| NUDX hydrolase ; K08311 putative (di)nucleoside polyphosphate hydrolase [EC:3.6.1.-]                                                   | tau:Tola_2963         | 525  | 100 | 1.5       | 20  |
| DNA helicase/exodeoxyribonuclease V, beta subunit (EC:3.1.11.5); K03582 exodeoxyribonuclease V beta subunit [EC:3.1.11.5]              | gme:Gmet_1893         | 3603 | 100 | 1.4       | 20  |
| conserved hypothetical protein; putative exported protein                                                                              | ecz:EC588_2910        | 513  | 86  | 6.00E-09  | 74  |
| heat shock protein HSP20                                                                                                               | rpf:Rpic12D_0623      | 459  | 97  | 0         | 459 |
| putative bacteriophage protein                                                                                                         | ent:Ent638_0805       | 531  | 82  | 0.001     | 89  |
| phage protein GP46                                                                                                                     | ecx:EcHS_A2085        | 450  | 89  | 1.00E-22  | 105 |
| ggA; sugar uptake ABC transporter ATP-binding protein ; K10548 putative multiple sugar transport system ATP-binding protein            | sme:SM_b20894         | 1521 | 96  | 0.36      | 25  |
| repressor protein for FtsI ; K04753 suppressor of ftsI                                                                                 | spe:Spro_4257         | 1416 | 100 | 0.023     | 23  |

|                                                                                                                                              |                       |      |     |           |     |
|----------------------------------------------------------------------------------------------------------------------------------------------|-----------------------|------|-----|-----------|-----|
| hypothetical protein                                                                                                                         | gem:GM21_0957         | 756  | 100 | 1.4       | 20  |
| hypothetical protein                                                                                                                         | tet:THERM_00279700    | 2556 | 100 | 1.4       | 20  |
| hypothetical protein                                                                                                                         | psc:Pe13g06980        | 954  | 96  | 0.088     | 26  |
| GF13640 gene product from transcript GF13640-RA                                                                                              | dan:Dana_GF13640      | 2646 | 100 | 0.35      | 21  |
| gntP; fructuronate transporter; K03299 gluconate:H+ symporter, GntP family                                                                   | ecz:ECS88_4939        | 1344 | 87  | 1.00E-93  | 372 |
| Ead domain protein                                                                                                                           | kpe:KPK_4165          | 666  | 92  | 9.00E-82  | 224 |
| putative prophage regulatory protein                                                                                                         | cro:ROD_09451         | 426  | 88  | 0.022     | 43  |
| PMT family 4-amino-4-deoxy-L-arabinose transferase/glycosyltransferase                                                                       | reu:Reut_B3508        | 1614 | 100 | 1.3       | 20  |
| insertion element protein                                                                                                                    | ecI:EcolC_3185        | 699  | 100 | 1.00E-131 | 239 |
| rpsB; 30S ribosomal protein S2; K02967 small subunit ribosomal protein S2                                                                    | rbp:RBP_2828          | 996  | 100 | 0.34      | 21  |
| hypothetical protein; K12290 pilus assembly protein Hofo                                                                                     | kpe:KPK_0352          | 429  | 86  | 5.00E-65  | 280 |
| fumarate hydratase, class II                                                                                                                 | dde:Dd586_2084        | 1398 | 100 | 0.33      | 21  |
| hypothetical protein                                                                                                                         | kpu:KP1_2161          | 603  | 93  | 1.00E-127 | 313 |
| hypothetical protein                                                                                                                         | kpe:KPK_4168          | 534  | 100 | 4.00E-13  | 41  |
| Hypothetical 71.7 kDa protein F52H3.2 in chromosome II, putative; K03495 glucose inhibited division protein A                                | bmy:Bm1_42115         | 1917 | 100 | 0.084     | 22  |
| Putative protein of unknown function; green fluorescent protein (GFP)-fusion protein localizes to the cytoplasm; YBL107C is not an essential | sce:YBL107C           | 591  | 100 | 0.082     | 22  |
| hypothetical protein                                                                                                                         | ecx:EcHS_A2089        | 510  | 82  | 5.00E-06  | 101 |
| putative cytoplasmic protein                                                                                                                 | stm:STM0948           | 402  | 92  | 1.00E-159 | 402 |
| hypothetical protein                                                                                                                         | see:SNL254_p_0052     | 636  | 100 | 1.00E-179 | 319 |
| yjfl; putative inner membrane protein; K08989 putative membrane protein                                                                      | sec:SC4249            | 399  | 82  | 2.00E-42  | 330 |
| type I secretion outer membrane protein, TolC family                                                                                         | pwa:Pecwa_3318        | 1413 | 100 | 0.079     | 22  |
| hypothetical protein                                                                                                                         | cqu:CqipJ_CPIJ008196  | 1077 | 100 | 0.005     | 24  |
| hypothetical protein                                                                                                                         | bbt:BBta_4140         | 1326 | 100 | 0.079     | 22  |
| rpsC; 30S ribosomal protein S3; K02982 small subunit ribosomal protein S3                                                                    | cco:CCC13826_1771     | 699  | 100 | 0.079     | 22  |
| traM; conjugal transfer protein TraM                                                                                                         | kpn:KPN_pKPN4p07124   | 399  | 83  | 0.02      | 75  |
| transposase IS4 family protein                                                                                                               | ppw:PputW619_3354     | 981  | 91  | 1.00E-133 | 390 |
| hypothetical protein                                                                                                                         | chr:CBG09837          | 1113 | 100 | 0.02      | 23  |
| hypothetical protein                                                                                                                         | dvu:DVU2023           | 540  | 100 | 0.019     | 23  |
| yfeK; hypothetical protein                                                                                                                   | set:SEN2419           | 384  | 78  | 2.00E-05  | 228 |
| adenylosuccinate synthetase (EC:6.3.4.4); K01939 adenylosuccinate synthase [EC:6.3.4.4]                                                      | ppd:Ppro_0518         | 1293 | 100 | 0.29      | 21  |
| hypothetical protein                                                                                                                         | cro:ROD_25891         | 372  | 88  | 2.00E-14  | 83  |
| chromosome segregation protein SMC; K03529 chromosome segregation protein                                                                    | mst:Msl1_3824         | 3456 | 100 | 0.29      | 21  |
| hypothetical protein                                                                                                                         | spq:SPAB_03662        | 144  | 98  | 1.00E-12  | 44  |
| crossover junction endodeoxyribonuclease RusA family protein                                                                                 | kpe:KPK_2853          | 357  | 94  | 2.00E-36  | 104 |
| hypothetical protein                                                                                                                         | pan:PODANSg4614       | 2148 | 100 | 1.1       | 20  |
| 4-aminobutyrate aminotransferase (EC:2.6.1.19)                                                                                               | aav:Aave_4333         | 1374 | 100 | 1.1       | 20  |
| hypothetical protein                                                                                                                         | pst:PSPTO_3423        | 285  | 100 | 0.072     | 22  |
| similar to ATP-binding cassette, sub-family A (ABC1), member 10; K05652 ATP-binding cassette, subfamily A (ABC1), member 10                  | tgw:100223114         | 4989 | 100 | 0.072     | 22  |
| hypothetical protein                                                                                                                         | kpu:KP1_0406          | 369  | 88  | 0.28      | 41  |
| Os03g0372500; hypothetical protein                                                                                                           | osa:4332941           | 2934 | 100 | 0.071     | 22  |
| hypothetical protein                                                                                                                         | ang:An18g04810        | 1272 | 100 | 0.28      | 21  |
| low complexity, questionable orf                                                                                                             | cal:CaO19.6878        | 573  | 93  | 0.27      | 29  |
| IS911 transposase orfB                                                                                                                       | ecm:EcSMS35_1101      | 747  | 93  | 1.00E-132 | 328 |
| DNA polymerase II (EC:2.7.7.7); K02336 DNA polymerase II [EC:2.7.7.7]                                                                        | vex:VEA_003097        | 2364 | 100 | 1.1       | 20  |
| murD; UDP-N-acetylmuramoyl-L-alanyl-D-glutamate synthetase (EC:6.3.2.9); K01925 UDP-N-acetylmuramoylalanine--D-glutamate ligase [EC:6.3.2.9] | las:CLIBASIA_05005    | 1407 | 100 | 4.2       | 19  |
| hypothetical protein                                                                                                                         | ecx:EcHS_A2080        | 1995 | 85  | 9.00E-26  | 150 |
| probable two-component response regulator protein                                                                                            | rhi:NGR_c18600        | 1248 | 100 | 1.1       | 20  |
| hypothetical protein                                                                                                                         | kpn:KPN_01381         | 210  | 100 | 3.00E-10  | 36  |
| hypothetical protein                                                                                                                         | swd:Swoc_1506         | 252  | 100 | 1         | 20  |
| ATP-binding region, ATPase-like domain-containing protein                                                                                    | ath:AT4G36280         | 1881 | 96  | 1         | 24  |
| yihN; putative transporter                                                                                                                   | ej:ECO26_4716         | 1266 | 84  | 1.00E-21  | 155 |
| gifts-2 prophage; putative RecA/RadA recombinase                                                                                             | sbp:Sbal223_0784      | 324  | 93  | 0.064     | 30  |
| hypothetical protein                                                                                                                         | eic:NT01EI_3129       | 318  | 87  | 6.00E-76  | 314 |
| transposase                                                                                                                                  | chr:ECB_03524         | 348  | 95  | 1.00E-135 | 309 |
| hypothetical protein                                                                                                                         | kpe:KPK_0888          | 321  | 95  | 2.00E-17  | 60  |
| putative transposase; K07497 putative transposase                                                                                            | set:SEN2616           | 1113 | 93  | 7.00E-82  | 228 |
| algI; alginate O-acetylation protein AlgI                                                                                                    | abo:ABO_0389          | 1419 | 100 | 0.97      | 20  |
| peptidase M1, membrane alanine aminopeptidase                                                                                                | ade:Adeh_0324         | 2625 | 100 | 0.061     | 22  |
| thioredoxin; K03672 thioredoxin 2 [EC:1.8.1.8]                                                                                               | rfp:Rpic12D_0618      | 441  | 92  | 1.00E-106 | 288 |
| yjfl; putative cytoplasmic protein; K09980 hypothetical protein                                                                              | stm:STM4370           | 405  | 89  | 0.004     | 44  |
| anti-anti-sigma regulatory factor                                                                                                            | vyv:VVA0580           | 921  | 100 | 0.24      | 21  |
| putative sugar ABC transporter ATP-binding protein; K02056 simple sugar transport system ATP-binding protein [EC:3.6.3.17]                   | sme:SM_b20485         | 1530 | 96  | 0.059     | 26  |
| similar to predicted protein                                                                                                                 | hmg:100207382         | 708  | 100 | 0.059     | 22  |
| gidA; tRNA uridine 5-carboxymethylaminomethyl modification enzyme GidA; K03495 glucose inhibited division protein A                          | abu:Abu_2210          | 1878 | 100 | 0.92      | 20  |
| folD; bifunctional: 5,10-methylene-tetrahydrofolate dehydrogenase; 5,10-methylene-tetrahydrofolate cyclohydrolase (EC:1.5.1.5 3.5.4.9); K00  | cti:RALTA_A1289       | 852  | 100 | 0.23      | 21  |
| hypothetical protein                                                                                                                         | esa:ESA_01037         | 396  | 89  | 0.058     | 38  |
| proS; prolyl-tRNA synthetase (EC:6.1.1.15); K01881 prolyl-tRNA synthetase [EC:6.1.1.15]                                                      | lpc:LPC_2600          | 1710 | 100 | 0.91      | 20  |
| GK15020 gene product from transcript GK15020-RA                                                                                              | dwi:Dwi1_GK15020      | 2517 | 100 | 0.91      | 20  |
| GK16257 gene product from transcript GK16257-RA                                                                                              | dmo:Dmoj_GK16257      | 6162 | 100 | 0.23      | 21  |
| apg3; autophagy associated protein Apg3 (predicted); K08343 autophagy-related protein 3                                                      | spo:SPBC3B9_06c       | 828  | 100 | 0.058     | 22  |
| GH24537 gene product from transcript GH24537-RA                                                                                              | dgr:Dgri_GH24537      | 1311 | 100 | 0.22      | 21  |
| poly(A) polymerase                                                                                                                           | tbr:Tb11.01.7300      | 1002 | 93  | 0.85      | 28  |
| hypothetical protein                                                                                                                         | sel:scs5761           | 1791 | 100 | 0.85      | 20  |
| hypothetical protein                                                                                                                         | cro:ROD_25881         | 279  | 85  | 2.00E-07  | 75  |
| SORBIDRAFT_09g030110; hypothetical protein                                                                                                   | dma:DMR_40370         | 633  | 100 | 0.21      | 21  |
| response regulator receiver modulated diguanylate cyclase/phosphodiesterase                                                                  | sbi:SORBI_09g030110   | 1506 | 100 | 0.84      | 20  |
| hypothetical protein                                                                                                                         | pat:Pat_3545          | 1710 | 100 | 0.83      | 20  |
| glutamate receptor kainate                                                                                                                   | ptm:GSPATT00024006001 | 1752 | 93  | 0.21      | 29  |
| flaS; adhesin                                                                                                                                | smm:Smp_153780        | 2799 | 100 | 0.82      | 20  |
| hypothetical protein                                                                                                                         | bpe:BP2667            | 7662 | 100 | 0.8       | 20  |
| hypothetical protein                                                                                                                         | kpe:KPK_3735          | 261  | 93  | 2.00E-63  | 169 |
| hypothetical protein                                                                                                                         | eko:CKO_04122         | 261  | 86  | 1.00E-08  | 77  |
| acetyl-CoA carboxylase, biotin carboxylase; K01946 biotin carboxylase [EC:6.3.4.14]; K01961 acetyl-CoA carboxylase, biotin carboxylase s     | mno:Mnod_6042         | 1356 | 93  | 0.2       | 29  |
| Mlh2-like protein                                                                                                                            | gla:GL50803_33083     | 4425 | 93  | 0.2       | 29  |
| curved-DNA-binding protein; K05516 curved DNA-binding protein                                                                                | psp:PSPPH_4482        | 960  | 100 | 0.2       | 21  |
| hypothetical protein                                                                                                                         | tet:THERM_01123880    | 3870 | 94  | 0.012     | 31  |
| hypothetical protein; K02684 DNA primase small subunit [EC:2.7.7.-]                                                                          | mgf:MGL_2934          | 1416 | 100 | 0.049     | 22  |
| hypothetical protein                                                                                                                         | kpu:KP1_2987          | 252  | 85  | 6.00E-51  | 252 |
| hypothetical protein                                                                                                                         | ej:ECO26_1176         | 261  | 96  | 0.012     | 27  |
| hypothetical protein                                                                                                                         | hpj:jhp0052           | 984  | 100 | 0.19      | 21  |
| hypothetical protein                                                                                                                         | tet:THERM_00459220    | 2253 | 96  | 0.74      | 24  |
| hypothetical protein                                                                                                                         | cju:C8J_0857          | 753  | 96  | 0.18      | 25  |
| amino acid ABC transporter permease                                                                                                          | nve:NEMVE_v1g213276   | 2295 | 100 | 0.72      | 20  |
| hypothetical protein                                                                                                                         | kpu:KP1_3573          | 246  | 87  | 2.00E-47  | 202 |
| pnrD; polymyxin B resistance protein                                                                                                         | eic:NT01EI_0924       | 549  | 91  | 7.00E-78  | 233 |
| transposase B; K07497 putative transposase                                                                                                   | lbc:LACBIDRAFT_297118 | 3294 | 96  | 0.7       | 24  |
| hypothetical protein                                                                                                                         | tad:TRIAADDRAFT_50243 | 1014 | 100 | 0.045     | 22  |
| hypothetical protein                                                                                                                         | nmu:Nmul_A1429        | 1218 | 100 | 0.68      | 20  |
| O-antigen polymerase                                                                                                                         | rfp:Rpic12D_0615      | 966  | 99  | 1.00E-115 | 224 |
| peptidase M48 Ste24p; K03799 heat shock protein HspX [EC:3.4.24.-]                                                                           | ccs:CCNA_03609        | 1350 | 100 | 0.67      | 20  |
| cell surface antigen Sca2                                                                                                                    | cel:F41D3.2           | 2049 | 100 | 0.67      | 20  |
| oac-26; O-ACYLtransferase homolog                                                                                                            | dde:Dde_0831          | 1509 | 100 | 0.17      | 21  |
| chain length determinant family protein                                                                                                      |                       |      |     |           |     |

|                                                                                                                                                                                                                                                                                    |                      |      |     |          |     |
|------------------------------------------------------------------------------------------------------------------------------------------------------------------------------------------------------------------------------------------------------------------------------------|----------------------|------|-----|----------|-----|
| hypothetical protein                                                                                                                                                                                                                                                               | rcu:RCOM_0297000     | 150  | 100 | 0.65     | 20  |
| bacteriophage lysis protein                                                                                                                                                                                                                                                        | sbc:SbBS512_E1451    | 300  | 100 | 0.17     | 21  |
| hypothetical protein                                                                                                                                                                                                                                                               | kpu:KPI_0389         | 105  | 100 | 4.00E-08 | 32  |
| hypothetical protein                                                                                                                                                                                                                                                               | kpe:KPK_B0060        | 126  | 88  | 2.00E-25 | 128 |
| rpsN; 30S ribosomal protein S14 ; K02954 small subunit ribosomal protein S14                                                                                                                                                                                                       | wpi:WPa_1179         | 309  | 100 | 0.16     | 21  |
| hypothetical protein                                                                                                                                                                                                                                                               | eoi:ECO111_3368      | 237  | 87  | 7.00E-07 | 62  |
| similar to hCG2037011                                                                                                                                                                                                                                                              | ssc:100156026        | 507  | 100 | 0.63     | 20  |
| UspA domain-containing protein                                                                                                                                                                                                                                                     | ppw:PputW619_3029    | 927  | 100 | 0.62     | 20  |
| transcriptional regulator, LysR family                                                                                                                                                                                                                                             | kpe:KPK_1300         | 885  | 95  | 2.00E-07 | 39  |
| putative fimbrial protein                                                                                                                                                                                                                                                          | kpu:KPI_4578         | 1242 | 92  | 1.00E-45 | 143 |
| PAS/PAC sensor hybrid histidine kinase                                                                                                                                                                                                                                             | dai:Dalk_2075        | 2241 | 96  | 2.5      | 23  |
| putative invertase                                                                                                                                                                                                                                                                 | kpn:KPN_01436        | 279  | 93  | 5.00E-54 | 149 |
| rplJ; 50S ribosomal protein L10 ; K02864 large subunit ribosomal protein L10                                                                                                                                                                                                       | net:Neut_1797        | 516  | 100 | 0.01     | 23  |
| putative IS602 transposase OriB                                                                                                                                                                                                                                                    | eoi:ECO111_3779      | 747  | 95  | 1.00E-88 | 207 |
| PDZ/DHR/GLGF domain-containing protein                                                                                                                                                                                                                                             | bid:Bind_0797        | 981  | 96  | 0.002    | 28  |
| cytochrome c oxidase, cbb3-type, subunit I; K00404 cb-type cytochrome c oxidase subunit I [EC:1.9.3.1]                                                                                                                                                                             | sit:TM1040_2545      | 1605 | 100 | 2.4      | 19  |
| importin-like protein                                                                                                                                                                                                                                                              | tan:TA11715          | 3846 | 100 | 0.15     | 21  |
| epimerase, PhzC/PhzF-like protein (EC:5.1.-.-); K06988                                                                                                                                                                                                                             | reh:H16_A2781        | 861  | 100 | 0.002    | 24  |
| hypothetical protein                                                                                                                                                                                                                                                               | cqu:CqipJ_CPIJ007470 | 1467 | 100 | 0.6      | 20  |
| minD; septum site-determining protein; K03609 septum site-determining protein MinD                                                                                                                                                                                                 | lpc:LPC_1164         | 831  | 100 | 0.59     | 20  |
| hypothetical protein                                                                                                                                                                                                                                                               | kpu:KPI_3253         | 126  | 96  | 3.00E-18 | 57  |
| glgS; glycogen synthesis protein                                                                                                                                                                                                                                                   | kpu:KPI_4739         | 204  | 91  | 2.00E-13 | 65  |
| arsR; arsenical resistance operon repressor                                                                                                                                                                                                                                        | ctu:Cu_1p00510       | 378  | 91  | 1.00E-08 | 53  |
| hypothetical protein                                                                                                                                                                                                                                                               | kpu:KPI_2686         | 195  | 95  | 2.00E-84 | 195 |
| GE24339 gene product from transcript GE24339-RA                                                                                                                                                                                                                                    | dya:Dyak_GE24339     | 4656 | 100 | 0.15     | 21  |
| GH23138 gene product from transcript GH23138-RA                                                                                                                                                                                                                                    | dgr:Dgri_GH23138     | 5919 | 100 | 0.037    | 22  |
| hypothetical protein                                                                                                                                                                                                                                                               | nmi:NMQ_1071         | 624  | 96  | 0.57     | 24  |
| transcriptional regulator, LysR family                                                                                                                                                                                                                                             | kpe:KPK_2589         | 876  | 80  | 6.00E-07 | 148 |
| yadF; putative carbonic anhydrase ; K01673 carbonic anhydrase [EC:4.2.1.1]                                                                                                                                                                                                         | kpu:KPI_0572         | 681  | 99  | 2.00E-40 | 90  |
| Gm8286, EG666784; predicted gene 8286                                                                                                                                                                                                                                              | mmu:666784           | 1764 | 100 | 0.57     | 20  |
| hypothetical protein                                                                                                                                                                                                                                                               | kpu:KPI_1144         | 111  | 91  | 4.00E-05 | 43  |
| hypothetical protein                                                                                                                                                                                                                                                               | tva:TVAG_432880      | 1239 | 100 | 2.2      | 19  |
| hypothetical protein                                                                                                                                                                                                                                                               | eca:ECA0366          | 312  | 83  | 3.00E-21 | 162 |
| hypothetical protein                                                                                                                                                                                                                                                               | kpe:KPK_3871         | 192  | 91  | 7.00E-59 | 193 |
| hypothetical protein                                                                                                                                                                                                                                                               | mlo:mI8225           | 483  | 100 | 0.009    | 23  |
| similar to KIAA1432                                                                                                                                                                                                                                                                | ecb:100059612        | 4032 | 96  | 0.55     | 24  |
| hypothetical protein                                                                                                                                                                                                                                                               | bra:BRADO4654        | 261  | 100 | 2.2      | 19  |
| hypothetical protein                                                                                                                                                                                                                                                               | pcb:PC000816.04.0    | 921  | 100 | 0.036    | 22  |
| hypothetical protein; K02210 minichromosome maintenance protein 7 (cell division control protein 47)                                                                                                                                                                               | ang:An16g04890       | 2424 | 100 | 0.54     | 20  |
| hypothetical protein                                                                                                                                                                                                                                                               | kpu:KPI_0696         | 234  | 93  | 6.00E-41 | 123 |
| hypothetical protein                                                                                                                                                                                                                                                               | dat:HRM2_17910       | 1302 | 100 | 0.54     | 20  |
| putative metal-dependent phosphohydrolase with HD subdomain ; K06885                                                                                                                                                                                                               | kpu:KPI_2389         | 1533 | 98  | 1.00E-57 | 123 |
| hypothetical protein ; K11985 TRAF-interacting protein                                                                                                                                                                                                                             | aag:AAEL_AAEL003787  | 1281 | 100 | 0.53     | 20  |
| waaL; O-antigen ligase                                                                                                                                                                                                                                                             | kpu:KPI_5317         | 1083 | 100 | 0.53     | 20  |
| hypothetical protein                                                                                                                                                                                                                                                               | sil:SIO1682          | 123  | 100 | 0.53     | 20  |
| lacA; thiogalactoside acetyltransferase                                                                                                                                                                                                                                            | eoh:ECO103_0324      | 612  | 97  | 4.00E-60 | 135 |
| yeiE; putative transcriptional regulator (LysR family)                                                                                                                                                                                                                             | kpn:KPN_00284        | 171  | 95  | 3.00E-18 | 61  |
| hypothetical protein                                                                                                                                                                                                                                                               | sfi:Sfi_3475         | 306  | 99  | 4.00E-45 | 98  |
| hypothetical protein LOC100240780                                                                                                                                                                                                                                                  | vvi:100240780        | 2202 | 100 | 0.13     | 21  |
| hypothetical protein                                                                                                                                                                                                                                                               | kpe:KPK_0338         | 114  | 91  | 7.00E-25 | 92  |
| GJ17609 gene product from transcript GJ17609-RA                                                                                                                                                                                                                                    | dvi:Dvir_GJ17609     | 1365 | 100 | 0.009    | 23  |
| DNA polymerase I (EC:2.7.7.7); K02335 DNA polymerase I [EC:2.7.7.7]                                                                                                                                                                                                                | spe:Sputen32_3906    | 2769 | 100 | 0.52     | 20  |
| hypothetical protein                                                                                                                                                                                                                                                               | kpe:KPK_2112         | 123  | 100 | 4.00E-11 | 37  |
| nitrate ABC transporter, inner membrane subunit ; K02050 sulfonate/nitrate/aurine transport system permease protein                                                                                                                                                                | rpi:Rpic_0236        | 852  | 96  | 0.033    | 26  |
| PIK3AP1; phosphoinositide-3-kinase adaptor protein 1; K12230 phosphoinositide 3-kinase adaptor protein 1                                                                                                                                                                           | mcc:705017           | 2418 | 96  | 2        | 23  |
| hypothetical protein                                                                                                                                                                                                                                                               | kpu:KPI_2355         | 117  | 93  | 6.00E-44 | 117 |
| miaA; tRNA delta(2)-isopentenylpyrophosphate transferase (EC:2.5.1.8); K00791 tRNA delta(2)-isopentenylpyrophosphate transferase [EC:2.5.1.8]                                                                                                                                      | nis:NIS_0303         | 900  | 96  | 0.13     | 25  |
| hypothetical protein                                                                                                                                                                                                                                                               | ccc:c5175            | 132  | 96  | 6.00E-13 | 48  |
| hypothetical protein                                                                                                                                                                                                                                                               | dar:Daro_0095        | 822  | 100 | 0.13     | 21  |
| hypothetical protein                                                                                                                                                                                                                                                               | kpu:KPI_3534         | 336  | 100 | 0.13     | 21  |
| hypothetical protein                                                                                                                                                                                                                                                               | kpe:KPK_1494         | 123  | 87  | 4.00E-17 | 95  |
| hypothetical protein                                                                                                                                                                                                                                                               | ecq:ECED1_2586       | 183  | 93  | 2.00E-06 | 45  |
| putative transporter                                                                                                                                                                                                                                                               | acn:ACIS_00875       | 1329 | 100 | 7.7      | 18  |
| hypothetical protein                                                                                                                                                                                                                                                               | kpu:KPI_1220         | 117  | 100 | 6.00E-59 | 117 |
| hypothetical protein                                                                                                                                                                                                                                                               | kpu:KPI_4770         | 366  | 95  | 1.00E-16 | 58  |
| hypothetical protein                                                                                                                                                                                                                                                               | dol:Dole_1861        | 996  | 100 | 0.03     | 22  |
| acyl-CoA dehydrogenase domain protein                                                                                                                                                                                                                                              | geo:Geob_2422        | 1233 | 100 | 0.12     | 21  |
| similar to CG3164-PB, isoform B                                                                                                                                                                                                                                                    | ame:414051           | 2112 | 100 | 0.03     | 22  |
| grpE; heat shock protein HSP70 cofactor (EC:5.1.3.1); K03687 molecular chaperone GrpE                                                                                                                                                                                              | efe:EFER_0459        | 1053 | 92  | 3.00E-42 | 117 |
| transposase IS3/IS911 family protein                                                                                                                                                                                                                                               | dda:Dd703_2340       | 279  | 87  | 7.00E-31 | 150 |
| ascG, ascBF operon repressor ; K03487 LacI family transcriptional regulator, asc operon repressor                                                                                                                                                                                  | kpu:KPI_4316         | 1056 | 100 | 3.00E-14 | 42  |
| c3-1; complement component C3                                                                                                                                                                                                                                                      | cin:445694           | 5322 | 100 | 1.8      | 19  |
| YD repeat-containing protein                                                                                                                                                                                                                                                       | ypb:YPTS_3419        | 4485 | 100 | 0.12     | 21  |
| hypothetical protein                                                                                                                                                                                                                                                               | tcr:503823.150       | 1599 | 96  | 0.45     | 24  |
| hypothetical protein                                                                                                                                                                                                                                                               | pfi:PFHG_02388       | 1060 | 96  | 0.11     | 25  |
| putative adenylate cyclase                                                                                                                                                                                                                                                         | cja:CJA_3519         | 2214 | 100 | 0.45     | 20  |
| hypothetical protein                                                                                                                                                                                                                                                               | kpe:KPK_0972         | 117  | 100 | 1.00E-22 | 56  |
| DNA-directed polymerase kappa (EC:6.3.5.5); K03511 DNA polymerase kappa subunit [EC:2.7.7.7]                                                                                                                                                                                       | afm:AFUA_7G01270     | 1845 | 100 | 0.029    | 22  |
| b2688, gsh-1, gshA; glutamate--cysteine ligase (EC:6.3.2.2); K01919 glutamate--cysteine ligase [EC:6.3.2.2]                                                                                                                                                                        | yen:YE0838           | 1560 | 100 | 1.8      | 19  |
| hypothetical protein                                                                                                                                                                                                                                                               | kpe:KPK_2923         | 159  | 86  | 1.00E-19 | 119 |
| isocitrate dehydrogenase, NADP-dependent ; K00031 isocitrate dehydrogenase [EC:1.1.1.42]                                                                                                                                                                                           | nmu:Nmul_A2245       | 1254 | 100 | 0.11     | 21  |
| hypothetical protein                                                                                                                                                                                                                                                               | kpu:KPI_2660         | 129  | 93  | 2.00E-09 | 46  |
| slc22a5; solute carrier family 22 (organic cation transporter), member 5; K08202 MFS transporter, OCT family, solute carrier family 22 (organic cation transporter), member 5; K08202 MFS transporter, OCT family, solute carrier family 22 (organic cation transporter), member 5 | xla:380592           | 1647 | 100 | 0.11     | 21  |
| phage minor tail protein L                                                                                                                                                                                                                                                         | mno:Mnod_5753        | 732  | 100 | 1.7      | 19  |
| hypothetical protein                                                                                                                                                                                                                                                               | dha:DEHA0B06732g     | 3480 | 100 | 0.43     | 20  |
| integral membrane sensor signal transduction histidine kinase                                                                                                                                                                                                                      | ddc:Dd586_1341       | 1071 | 96  | 0.43     | 24  |
| hypothetical protein                                                                                                                                                                                                                                                               | ecw:EcE24377A_B0002  | 150  | 97  | 4.00E-69 | 150 |
| similar to acrosomal matrix component AM67                                                                                                                                                                                                                                         | ecb:100056262        | 2409 | 100 | 0.43     | 20  |
| hypothetical protein                                                                                                                                                                                                                                                               | tet:TTHERM_00864920  | 606  | 93  | 0.027    | 30  |
| sueB; dihydrolipoamide succinyltransferase component of 2-oxoglutarate dehydrogenase complex (EC:2.3.1.61); K00658 2-oxoglutarate dehydrogenase complex, 2-oxoglutarate dehydrogenase component                                                                                    | bab:bbp281           | 1233 | 96  | 0.11     | 25  |
| IS5 transposase                                                                                                                                                                                                                                                                    | vci:VCD_000992       | 981  | 83  | 1.00E-04 | 86  |
| hypothetical protein                                                                                                                                                                                                                                                               | kpe:KPK_3962         | 120  | 92  | 0.007    | 39  |
| hypothetical protein                                                                                                                                                                                                                                                               | kpe:KPK_1141         | 117  | 92  | 2.00E-24 | 87  |
| hypothetical protein                                                                                                                                                                                                                                                               | kpu:KPI_1985         | 171  | 90  | 4.00E-35 | 129 |
| putative cytoplasmic protein                                                                                                                                                                                                                                                       | rrj:Rrlowa_0840      | 324  | 100 | 1.6      | 19  |
| Cytochrome P450 family protein (EC:1.14.14.1); K00493 unspecific monooxygenase [EC:1.14.14.1]                                                                                                                                                                                      | tet:TTHERM_00200550  | 1551 | 100 | 0.42     | 20  |
| hypothetical protein                                                                                                                                                                                                                                                               | scl:sce2396          | 285  | 93  | 0.027    | 30  |
| cytochrome c family protein                                                                                                                                                                                                                                                        | ank:AnaeK_3174       | 3990 | 100 | 0.1      | 21  |
| hypothetical protein                                                                                                                                                                                                                                                               | kpu:KPI_2587         | 186  | 85  | 5.00E-22 | 143 |
| hypothetical protein LOC432253                                                                                                                                                                                                                                                     | xla:432253           | 1839 | 100 | 0.41     | 20  |
| hypothetical protein                                                                                                                                                                                                                                                               | zro:ZYROOD13398g     | 1917 | 100 | 0.41     | 20  |
| rprA; regulatory RNA                                                                                                                                                                                                                                                               | stm:STM1363          | 107  | 100 | 0.026    | 22  |

|                                                                                                                                     |                        |      |     |          |     |
|-------------------------------------------------------------------------------------------------------------------------------------|------------------------|------|-----|----------|-----|
| ATP-dependent metalloprotease FtsH (EC:3.6.4.3); K03798 cell division protease FtsH [EC:3.4.24.-]                                   | rfp:Rp1c12D_0624       | 1818 | 100 | 4.00E-75 | 144 |
| similar to CG9092-PA                                                                                                                | tea:655997             | 1968 | 100 | 1.6      | 19  |
| inta; integrase                                                                                                                     | eck:EC55989_2909       | 1242 | 94  | 9.00E-27 | 83  |
| ribosomal rna methyltransferase ; K02427 ribosomal RNA large subunit methyltransferase E [EC:2.1.1.-]                               | pkn:PKH_070600         | 1605 | 96  | 0.025    | 26  |
| adenylate/guanylate cyclase with CHASE sensor                                                                                       | geo:Geob_0882          | 2106 | 97  | 0.1      | 29  |
| hypothetical protein                                                                                                                | kpu:KPI_3926           | 135  | 100 | 5.00E-13 | 40  |
| queF; 7-cyano-7-deazaguanine reductase                                                                                              | vei:Veis_4790          | 846  | 96  | 0.1      | 25  |
| similar to myosin, heavy chain 1, skeletal muscle, adult; K10352 myosin heavy chain                                                 | tgu:100225611          | 5835 | 96  | 0.4      | 24  |
| hypothetical protein                                                                                                                | kpe:KPK_2377           | 141  | 90  | 7.00E-12 | 62  |
| hypothetical protein                                                                                                                | kpu:KPI_5510           | 138  | 96  | 1.00E-35 | 94  |
| similar to IkappaB kinase gamma                                                                                                     | hmg:100213125          | 3147 | 100 | 0.1      | 21  |
| hypothetical protein                                                                                                                | ptm:GSPATT00037997001  | 609  | 100 | 0.4      | 20  |
| hypothetical protein                                                                                                                | ses:SARI_02634         | 477  | 92  | 5.00E-13 | 64  |
| hypothetical protein; K02462 general secretion pathway protein M                                                                    | aav:Aave_0919          | 654  | 96  | 0.098    | 25  |
| Os01g0362100; hypothetical protein                                                                                                  | osa:4325812            | 2097 | 96  | 0.39     | 24  |
| transcriptional regulator, LuxR family                                                                                              | kpe:KPK_4797           | 723  | 87  | 5.00E-28 | 137 |
| transporter AcrB/D/F family                                                                                                         | vex:VEA_000655         | 3063 | 100 | 1.5      | 19  |
| phosphoenolpyruvate-dependent PTS family enzyme IIA component                                                                       | kpu:KPI_2729           | 450  | 92  | 2.00E-27 | 92  |
| putative bacteriophage protein (gene 65)                                                                                            | ecz:ECS88_2522         | 153  | 94  | 1.00E-04 | 34  |
| hypothetical protein                                                                                                                | kpe:KPK_0397           | 108  | 92  | 3.00E-08 | 48  |
| hypothetical protein                                                                                                                | tad:TR1ADDRESSFT_53596 | 8205 | 100 | 0.095    | 21  |
| pepN; aminopeptidase N (EC:3.4.11.2); K01256 aminopeptidase N [EC:3.4.11.2]                                                         | abb:ABF6A_001374       | 2607 | 100 | 1.5      | 19  |
| hypothetical protein                                                                                                                | ptm:GSPATT00008844001  | 510  | 100 | 0.38     | 20  |
| hypothetical protein                                                                                                                | kpn:KPN_02457          | 183  | 83  | 1.00E-07 | 95  |
| hypothetical protein; K03126 transcription initiation factor TFIIID subunit D10                                                     | ctp:CTRG_00709         | 2412 | 100 | 0.37     | 20  |
| hypothetical protein                                                                                                                | scl:sce1912            | 1494 | 96  | 0.37     | 24  |
| hypothetical protein                                                                                                                | hae:Hac_1450           | 921  | 100 | 0.006    | 23  |
| response regulator                                                                                                                  | pfl:PFL_1972           | 1185 | 100 | 0.093    | 21  |
| Cob(I)yrinic acid 4c-diamide adenosyltransferase (EC:2.5.1.17); K00798 cob(I)alaminal adenosyltransferase [EC:2.5.1.17]             | pen:PSEEN4473          | 567  | 100 | 0.093    | 21  |
| hypothetical protein                                                                                                                | cak:Caul_1641          | 816  | 100 | 0.36     | 20  |
| ygdL; putative enzyme                                                                                                               | kpn:KPN_04165          | 168  | 97  | 2.00E-05 | 31  |
| trwL6; TrwL6 protein                                                                                                                | bhe:BHI5620            | 315  | 100 | 1.4      | 19  |
| hypothetical protein                                                                                                                | pbe:PB000253.03.0      | 3096 | 100 | 0.36     | 20  |
| GH24601 gene product from transcript GH24601-RA                                                                                     | dgr:Dgri_GH24601       | 1263 | 100 | 0.36     | 20  |
| integrase catalytic subunit ; K07497 putative transposase                                                                           | ent:Ent638_0741        | 813  | 92  | 4.00E-04 | 37  |
| multidrug resistance pump, putative                                                                                                 | rcu:RCOM_0845260       | 1467 | 100 | 0.023    | 22  |
| guaB; inosine-5'-monophosphate dehydrogenase (EC:1.1.1.205); K00088 IMP dehydrogenase [EC:1.1.1.205]                                | ttu:TERTU_2616         | 1476 | 100 | 0.36     | 20  |
| GD23395 gene product from transcript GD23395-RA                                                                                     | dsi:Dsim_GD23395       | 2469 | 96  | 0.36     | 24  |
| hypothetical protein                                                                                                                | pan:PODANSg8758        | 5076 | 100 | 0.023    | 22  |
| carB; carbamoylphosphate synthase large subunit (split gene in MJ); K01955 carbamoyl-phosphate synthase large subunit [EC:6.3.5.5]  | lip:LI0939             | 3231 | 100 | 0.091    | 21  |
| hypothetical protein                                                                                                                | kpu:KPI_1844           | 288  | 89  | 0.001    | 44  |
| IcIR regulatory protein                                                                                                             | bgl:hglu_1g24760       | 810  | 100 | 5.6      | 18  |
| hypothetical protein                                                                                                                | ppp:PHYPADRAFT_75061   | 378  | 100 | 0.091    | 21  |
| GE15592 gene product from transcript GE15592-RA                                                                                     | dya:Dyak_GE15592       | 1617 | 100 | 0.088    | 21  |
| thrombospondin type 3 repeat family                                                                                                 | cja:CJA_2517           | 5805 | 100 | 0.088    | 21  |
| rsmC; 16S ribosomal RNA m2G1207 methyltransferase ; K00564 ribosomal RNA small subunit methyltransferase C [EC:2.1.1.52]            | sbo:SBO_4432           | 1032 | 100 | 1.4      | 19  |
| thiamineS protein                                                                                                                   | bac:BamCMC46_5087      | 270  | 100 | 1.4      | 19  |
| hypothetical protein                                                                                                                | ppp:PHYPADRAFT_68797   | 1482 | 100 | 0.35     | 20  |
| similar to predicted protein                                                                                                        | cim:100183007          | 864  | 100 | 0.35     | 20  |
| hypothetical protein                                                                                                                | ddi:DDBDRAFT_0188581   | 1821 | 100 | 1.4      | 19  |
| hypothetical protein                                                                                                                | stu:t4368              | 213  | 98  | 7.00E-18 | 56  |
| hypothetical protein                                                                                                                | fgr:F600401.1          | 243  | 100 | 0.34     | 20  |
| hypothetical protein                                                                                                                | ctp:CTRG_04705         | 1602 | 100 | 0.086    | 21  |
| TetR family transcriptional regulator                                                                                               | bxe:Bxe_B0084          | 618  | 100 | 1.3      | 19  |
| glycosyl transferase group 1                                                                                                        | gbm:Gbm_0853           | 1182 | 96  | 1.3      | 23  |
| LoIC/E family lipoprotein releasing system, transmembrane protein ; K09808 lipoprotein-releasing system permease protein            | reu:Reut_A1076         | 1251 | 100 | 0.34     | 20  |
| hypothetical protein                                                                                                                | ecm:EcSMS35_4832       | 651  | 96  | 1.3      | 23  |
| methyl-accepting chemotaxis protein ; K03406 methyl-accepting chemotaxis protein                                                    | abu:Abu_0528           | 1902 | 100 | 0.022    | 22  |
| glucose dehydrogenase ; K00117 quinoprotein glucose dehydrogenase [EC:1.1.5.2]                                                      | pin:Ping_3086          | 2328 | 100 | 0.34     | 20  |
| histidine kinase                                                                                                                    | azc:AZC_4066           | 1779 | 100 | 5.3      | 18  |
| hypothetical protein                                                                                                                | sew:SeSA_A2675         | 126  | 88  | 1.00E-06 | 57  |
| fibronectin, type III domain-containing protein                                                                                     | gur:Gura_0068          | 5088 | 100 | 0.086    | 21  |
| hypothetical protein                                                                                                                | kpe:KPK_2190           | 120  | 97  | 1.00E-06 | 33  |
| hypothetical protein                                                                                                                | kpu:KPI_2621           | 198  | 90  | 4.00E-22 | 91  |
| hypothetical protein                                                                                                                | nve:NEMVE_v1g202346    | 1653 | 100 | 0.33     | 20  |
| UDP-glucose 6-dehydrogenase (EC:1.1.1.22); K00012 UDPglucose 6-dehydrogenase [EC:1.1.1.22]                                          | xau:Xaut_3551          | 1317 | 100 | 0.083    | 21  |
| glutaredoxin                                                                                                                        | sdn:Sden_1584          | 444  | 100 | 5.1      | 18  |
| ATP-binding cassette (ABC) superfamily protein ; K02471 putative ATP-binding cassette transporter                                   | fph:Fphi_0895          | 1671 | 100 | 0.33     | 20  |
| hypothetical protein                                                                                                                | kpe:KPK_5243           | 144  | 92  | 5.00E-28 | 97  |
| long-chain acyl-CoA synthetase                                                                                                      | vyv:VV2667             | 1686 | 93  | 0.33     | 28  |
| oligopeptide/dipeptide ABC transporter, ATPase subunit ; K02032 peptide/nickel transport system ATP-binding protein                 | mes:Meso_3136          | 966  | 96  | 0.005    | 27  |
| isf1u ; transposase                                                                                                                 | ftf:FTF1780            | 786  | 100 | 7.00E-61 | 120 |
| hypothetical protein                                                                                                                | tva:TVAG_127280        | 1188 | 100 | 1.3      | 19  |
| putative sugar ABC transporter, periplasmic protein; K10439 ribose transport system substrate-binding protein                       | yen:YE0818             | 975  | 93  | 2.00E-05 | 43  |
| aroB; 3-dehydroquinate synthase (EC:4.2.3.4); K01735 3-dehydroquinate synthase [EC:4.2.3.4]                                         | abu:Abu_1125           | 1035 | 100 | 0.081    | 21  |
| pseudogene                                                                                                                          | ypg:YpAngola_0019      | 560  | 100 | 0.001    | 24  |
| Os06g0148900; hypothetical protein                                                                                                  | osa:4340134            | 1107 | 100 | 0.32     | 20  |
| hypothetical protein                                                                                                                | ddi:DDBDRAFT_0189420   | 2901 | 100 | 0.02     | 22  |
| hypothetical protein                                                                                                                | kpu:KPI_5277           | 249  | 100 | 3.00E-23 | 57  |
| conserved hypothetical protein                                                                                                      | ph:PFHG_02801          | 2224 | 96  | 0.02     | 26  |
| hypothetical protein                                                                                                                | spq:SPAB_05502         | 111  | 100 | 9.00E-08 | 31  |
| conserved hypothetical protein                                                                                                      | ph:PFHG_01746          | 1632 | 93  | 0.081    | 29  |
| hypothetical protein                                                                                                                | kpe:KPK_4286           | 129  | 100 | 2.00E-18 | 49  |
| hypothetical protein                                                                                                                | kpu:KPI_2016           | 117  | 98  | 2.00E-21 | 58  |
| Atm; ataxia telangiectasia mutated homolog (human) (EC:2.7.11.1); K04728 ataxia telangiectasia mutated family protein [EC:2.7.11.1] | mmu:11920              | 9201 | 91  | 0.32     | 32  |
| Tubh2c; tubulin, beta 2C; K07375 tubulin beta                                                                                       | mmu:227613             | 1338 | 100 | 0.081    | 21  |
| hypothetical protein                                                                                                                | pyo:PY06423            | 4384 | 100 | 0.32     | 20  |
| hypothetical protein                                                                                                                | dvl:Dvul_2206          | 267  | 100 | 0.31     | 20  |
| major facilitator transporter                                                                                                       | bam:Bamb_3946          | 1287 | 100 | 0.31     | 20  |
| FAD-dependent pyridine nucleotide-disulphide oxidoreductase ; K00384 thioredoxin reductase (NADPH) [EC:1.8.1.9]                     | bph:Bphy_3740          | 1056 | 100 | 1.2      | 19  |
| yeeO; putative MATE family transport protein                                                                                        | kpu:KPI_3579           | 1470 | 96  | 0.001    | 28  |
| subunit of the histone acetyltransferase SAGA complex, putative                                                                     | edu:CD36_35060         | 3849 | 100 | 0.31     | 20  |
| ApbE family lipoprotein ; K03734 thiamine biosynthesis lipoprotein                                                                  | mch:Mchl_1534          | 981  | 100 | 0.078    | 21  |
| amiB; N-acetylmuramoyl-L-alanine amidase (EC:3.5.1.28); K01448 N-acetylmuramoyl-L-alanine amidase [EC:3.5.1.28]                     | cps:CPS_0322           | 1332 | 100 | 1.2      | 19  |
| hypothetical protein                                                                                                                | kpe:KPK_2338           | 114  | 85  | 4.00E-16 | 113 |
| hypothetical protein                                                                                                                | acb:AIS_0060           | 768  | 100 | 0.078    | 21  |
| hypothetical protein                                                                                                                | sea:SeAg_B2544         | 123  | 89  | 0.078    | 37  |
| hypothetical protein                                                                                                                | kpu:KPI_3837           | 114  | 83  | 1.00E-09 | 87  |
| alkanesulfonate transporter substrate-binding subunit ; K02051 sulfonate/nitrate/taurine transport system substrate-binding protein | spe:Spro_1738          | 966  | 100 | 1.2      | 19  |
| hutC; histidine utilization repressor C ; K05836 GntR family transcriptional regulator, histidine utilization repressor             | kpu:KPI_1744           | 726  | 91  | 5.00E-06 | 44  |
| multidrug efflux system outer membrane protein                                                                                      | bav:BAV1655            | 1464 | 96  | 0.078    | 25  |
| cytochrome-c oxidase (EC:1.9.3.1); K02274 cytochrome c oxidase subunit I [EC:1.9.3.1]                                               | bxe:Bxe_A2184          | 2040 | 100 | 1.2      | 19  |

|                                                                                                 |                      |      |     |          |    |
|-------------------------------------------------------------------------------------------------|----------------------|------|-----|----------|----|
| idhA; inositol 2-dehydrogenase (EC:1.1.1.18); K00010 myo-inositol 2-dehydrogenase [EC:1.1.1.18] | kpe:KPK_4081         | 1008 | 97  | 1.00E-28 | 74 |
| hypothetical protein                                                                            | ppp:PHYPADRAFT_45234 | 684  | 100 | 0.31     | 20 |

<sup>a</sup>Predicted protein function of the top BLASTN hit of each unique 10982 feature to the KEGG database irrespective of the alignment length and e-value.

<sup>b</sup>The gene id of the top BLAST hit



Supplemental Table 5. BSR analysis using TBLASTN of the amino acid sequences of putative virulence genes, nitrogen-fixation genes, allantoin metabolism genes, and citrate fermentation genes.

| Gene <sup>a</sup>           | Accession Number <sup>b</sup> | <i>K. variicola</i> genomes |      |        | <i>Klebsiella</i> sp. | <i>K. pneumoniae</i> genomes |         |      |          |            |            |           |            |
|-----------------------------|-------------------------------|-----------------------------|------|--------|-----------------------|------------------------------|---------|------|----------|------------|------------|-----------|------------|
|                             |                               | At-22                       | 342  | 1_1_55 | 10982                 | MGH 78578                    | 1162281 | JH1  | KMS_92_3 | 1191100241 | ATCC 13884 | KCTC 2242 | NTUH-K2044 |
| <b>Virulence-associated</b> |                               |                             |      |        |                       |                              |         |      |          |            |            |           |            |
| <i>magA</i>                 | BAC76772.1                    | 0.05                        | 0.05 | 0.05   | 0.05                  | 0.05                         | 0.05    | 0.05 | 0.05     | 0.05       | 0.05       | 0.05      | 1.00       |
| <i>allS</i>                 | BAD14988.1                    | 0.27                        | 0.27 | 0.27   | 0.95                  | 0.27                         | 0.27    | 0.27 | 0.27     | 0.27       | 0.27       | 0.27      | 0.95       |
| <i>rmpA</i>                 | YP_001687850.1                | 0.09                        | 0.09 | 0.09   | 0.07                  | 0.07                         | 0.09    | 0.08 | 0.07     | 0.07       | 1.00       | 1.00      | 1.00       |
| <i>kfu</i>                  | BAH62695.1                    | 0.93                        | 0.93 | 0.93   | 0.96                  | 0.99                         | 0.99    | 0.99 | 0.99     | 0.99       | 0.99       | 0.99      | 1.00       |
| <i>uge/wcaG</i>             | AAp68521.1                    | 0.97                        | 0.98 | 0.98   | 0.98                  | 0.97                         | 0.98    | 0.98 | 0.98     | 0.98       | 0.97       | 0.98      | 0.98       |
| <i>wabG</i>                 | AAx20104.1                    | 0.97                        | 0.97 | 0.97   | 0.97                  | 0.99                         | 0.98    | 0.99 | 0.99     | 0.98       | 0.98       | 0.99      | 0.99       |
| <i>ureA</i>                 | ABR78861.1                    | 1.00                        | 1.00 | 1.00   | 1.00                  | 1.00                         | 1.00    | 1.00 | 1.00     | 1.00       | 1.00       | 1.00      | 1.00       |
| <i>fimH</i>                 | AAA25091.1                    | 0.93                        | 0.93 | 0.93   | 1.00                  | 1.00                         | 1.00    | 1.00 | 1.00     | 1.00       | 1.00       | 1.00      | 1.00       |
| <b>Nitrogen-fixation</b>    |                               |                             |      |        |                       |                              |         |      |          |            |            |           |            |
| hypothetical                | YP_002237546.1                | 0.9419                      | 1    | 0.8564 | 0.99                  | 0.90                         | 0.66    | 0.49 | 0.81     | 0.88       | 0.66       | 0.71      | 0.88       |
| <i>nifQ</i>                 | YP_002237547.1                | 1.00                        | 1.00 | 1.00   | 0.99                  | 0.08                         | 0.08    | 0.08 | 0.08     | 0.08       | 0.08       | 0.08      | 0.08       |
| <i>nifB</i>                 | YP_002237548.1                | 1.00                        | 1.00 | 1.00   | 1.00                  | 0.05                         | 0.05    | 0.05 | 0.05     | 0.05       | 0.05       | 0.05      | 0.05       |
| <i>nifA</i>                 | YP_002237549.1                | 1.00                        | 1.00 | 1.00   | 1.00                  | 0.27                         | 0.27    | 0.27 | 0.27     | 0.27       | 0.27       | 0.27      | 0.27       |
| <i>nifL</i>                 | YP_002237550.1                | 1.00                        | 1.00 | 1.00   | 1.00                  | 0.04                         | 0.04    | 0.04 | 0.04     | 0.04       | 0.04       | 0.04      | 0.04       |
| <i>nifF</i>                 | YP_002237551.1                | 0.99                        | 1.00 | 1.00   | 1.00                  | 0.42                         | 0.42    | 0.42 | 0.42     | 0.42       | 0.42       | 0.42      | 0.42       |
| <i>nifM</i>                 | YP_002237552.1                | 0.99                        | 1.00 | 0.99   | 1.00                  | 0.11                         | 0.11    | 0.11 | 0.11     | 0.11       | 0.11       | 0.11      | 0.11       |
| <i>nifZ</i>                 | YP_002237553.1                | 1.00                        | 1.00 | 0.99   | 1.00                  | 0.10                         | 0.10    | 0.10 | 0.10     | 0.09       | 0.10       | 0.10      | 0.10       |
| <i>nifW</i>                 | YP_002237554.1                | 1.00                        | 1.00 | 1.00   | 1.00                  | 0.17                         | 0.17    | 0.17 | 0.16     | 0.17       | 0.17       | 0.16      | 0.17       |
| <i>nifV</i>                 | YP_002237555.1                | 1.00                        | 1.00 | 1.00   | 1.00                  | 0.23                         | 0.23    | 0.23 | 0.23     | 0.23       | 0.23       | 0.23      | 0.23       |
| <i>nifS</i>                 | YP_002237556.1                | 1.00                        | 1.00 | 0.99   | 1.00                  | 0.40                         | 0.40    | 0.40 | 0.40     | 0.40       | 0.40       | 0.40      | 0.40       |
| <i>nifU</i>                 | YP_002237557.1                | 1.00                        | 1.00 | 1.00   | 1.00                  | 0.22                         | 0.22    | 0.22 | 0.22     | 0.22       | 0.22       | 0.22      | 0.22       |
| <i>nifX</i>                 | YP_002237558.1                | 1.00                        | 1.00 | 1.00   | 1.00                  | 0.09                         | 0.09    | 0.09 | 0.09     | 0.09       | 0.09       | 0.09      | 0.09       |
| <i>nifN</i>                 | YP_002237559.1                | 0.98                        | 1.00 | 1.00   | 0.99                  | 0.03                         | 0.03    | 0.03 | 0.03     | 0.03       | 0.03       | 0.03      | 0.03       |
| <i>nifE</i>                 | YP_002237560.1                | 1.00                        | 1.00 | 1.00   | 1.00                  | 0.03                         | 0.03    | 0.03 | 0.03     | 0.03       | 0.03       | 0.03      | 0.03       |
| <i>nifY</i>                 | YP_002237561.1                | 0.99                        | 1.00 | 0.98   | 0.98                  | 0.07                         | 0.07    | 0.07 | 0.08     | 0.07       | 0.07       | 0.07      | 0.07       |
| <i>nifT</i>                 | YP_002237562.1                | 0.99                        | 1.00 | 1.00   | 1.00                  | 0.19                         | 0.19    | 0.19 | 0.19     | 0.19       | 0.19       | 0.19      | 0.19       |
| <i>nifK</i>                 | YP_002237563.1                | 1.00                        | 1.00 | 1.00   | 1.00                  | 0.03                         | 0.03    | 0.03 | 0.03     | 0.03       | 0.03       | 0.03      | 0.03       |
| <i>nifD</i>                 | YP_002237564.1                | 1.00                        | 1.00 | 1.00   | 1.00                  | 0.03                         | 0.03    | 0.03 | 0.03     | 0.03       | 0.03       | 0.03      | 0.03       |
| <i>nifH</i>                 | YP_002237565.1                | 0.98                        | 1.00 | 0.98   | 0.98                  | 0.07                         | 0.07    | 0.07 | 0.07     | 0.07       | 0.06       | 0.06      | 0.08       |
| <i>nifJ</i>                 | YP_002237566.1                | 1.00                        | 1.00 | 1.00   | 1.00                  | 0.47                         | 0.47    | 0.47 | 0.47     | 0.47       | 0.47       | 0.47      | 0.47       |
| hypothetical                | YP_002237567.1                | 1.00                        | 1.00 | 1.00   | 1.00                  | 0.97                         | 0.97    | 0.97 | 0.96     | 0.97       | 0.97       | 0.97      | 0.97       |
| <b>Allantoin metabolism</b> |                               |                             |      |        |                       |                              |         |      |          |            |            |           |            |
| <i>ybbB</i>                 | YP_002918198.1                | 0.96                        | 0.96 | 0.97   | 0.97                  | 0.98                         | 0.98    | 0.98 | 0.96     | 0.98       | 0.97       | 0.98      | 1.00       |
| <i>allS</i>                 | YP_002918199.1                | 0.25                        | 0.25 | 0.25   | 0.99                  | 0.25                         | 0.25    | 0.25 | 0.25     | 0.25       | 0.25       | 0.25      | 1.00       |
| <i>allA</i>                 | YP_002918200.1                | 0.08                        | 0.08 | 0.08   | 1.00                  | 0.09                         | 0.08    | 0.08 | 0.08     | 0.09       | 0.08       | 0.08      | 1.00       |
| <i>allR</i>                 | YP_002918201.1                | 0.37                        | 0.37 | 0.37   | 1.00                  | 0.37                         | 0.37    | 0.37 | 0.37     | 0.37       | 0.37       | 0.37      | 1.00       |
| <i>gcl</i>                  | YP_002918202.1                | 0.27                        | 0.27 | 0.27   | 1.00                  | 0.27                         | 0.27    | 0.27 | 0.27     | 0.27       | 0.27       | 0.27      | 1.00       |
| <i>hyi</i>                  | YP_002918203.1                | 0.43                        | 0.40 | 0.40   | 0.84                  | 0.42                         | 0.41    | 0.42 | 0.42     | 0.42       | 0.42       | 0.41      | 1.00       |
| <i>glxR</i>                 | YP_002918204.1                | 0.40                        | 0.40 | 0.40   | 0.99                  | 0.39                         | 0.39    | 0.35 | 0.39     | 0.39       | 0.39       | 0.39      | 1.00       |
| hypothetical                | YP_002918205.1                | 0.12                        | 0.12 | 0.12   | 0.98                  | 0.11                         | 0.11    | 0.11 | 0.11     | 0.11       | 0.11       | 0.11      | 1.00       |
| <i>ybbW</i>                 | YP_002918206.1                | 0.27                        | 0.27 | 0.27   | 0.99                  | 0.27                         | 0.27    | 0.27 | 0.27     | 0.27       | 0.05       | 0.27      | 1.00       |
| <i>allB</i>                 | YP_002918207.1                | 0.05                        | 0.05 | 0.05   | 1.00                  | 0.05                         | 0.05    | 0.05 | 0.05     | 0.05       | 0.18       | 0.18      | 1.00       |
| <i>ybbY</i>                 | YP_002918208.1                | 0.06                        | 0.06 | 0.06   | 0.99                  | 0.06                         | 0.06    | 0.06 | 0.06     | 0.06       | 0.05       | 0.07      | 1.00       |
| <i>glxK</i>                 | YP_002918209.1                | 0.59                        | 0.60 | 0.59   | 1.00                  | 0.62                         | 0.62    | 0.61 | 0.61     | 0.61       | 0.61       | 0.61      | 1.00       |
| hypothetical                | YP_002918210.1                | 0.05                        | 0.05 | 0.05   | 0.97                  | 0.05                         | 0.05    | 0.05 | 0.05     | 0.05       | 0.05       | 0.05      | 1.00       |
| <i>allC</i>                 | YP_002918211.1                | 0.23                        | 0.23 | 0.23   | 0.99                  | 0.23                         | 0.23    | 0.23 | 0.21     | 0.23       | 0.22       | 0.23      | 1.00       |
| <i>yibC</i>                 | YP_002918212.1                | 0.18                        | 0.18 | 0.18   | 1.00                  | 0.18                         | 0.18    | 0.18 | 0.18     | 0.18       | 0.18       | 0.18      | 1.00       |
| <i>fdrA</i>                 | YP_002918213.1                | 0.05                        | 0.05 | 0.05   | 1.00                  | 0.05                         | 0.05    | 0.05 | 0.05     | 0.05       | 0.05       | 0.05      | 1.00       |
| <i>yibE</i>                 | YP_002918214.1                | 0.04                        | 0.04 | 0.04   | 1.00                  | 0.04                         | 0.04    | 0.04 | 0.04     | 0.04       | 0.04       | 0.04      | 1.00       |
| <i>yibF</i>                 | YP_002918215.1                | 0.05                        | 0.05 | 0.05   | 1.00                  | 0.05                         | 0.05    | 0.05 | 0.05     | 0.05       | 0.06       | 0.06      | 1.00       |
| <i>arcC</i>                 | YP_002918216.1                | 0.05                        | 0.05 | 0.05   | 1.00                  | 0.05                         | 0.05    | 0.05 | 0.05     | 0.05       | 0.05       | 0.05      | 1.00       |
| <i>purK</i>                 | YP_002918217.1                | 0.98                        | 0.98 | 0.98   | 0.96                  | 1.00                         | 1.00    | 1.00 | 1.00     | 1.00       | 1.00       | 1.00      | 1.00       |
| <b>Citrate synthesis</b>    |                               |                             |      |        |                       |                              |         |      |          |            |            |           |            |
| <i>lysR</i>                 | YP_001333717.1                | 0.96                        | 0.95 | 0.96   | 0.95                  | 1.00                         | 0.99    | 0.99 | 1.00     | 0.99       | 0.99       | 1.00      | 1.00       |
| <i>citB</i>                 | YP_001333718.1                | 0.98                        | 0.98 | 0.37   | 0.96                  | 1.00                         | 0.38    | 0.37 | 0.38     | 1.00       | 0.38       | 1.00      | 0.38       |
| <i>citA</i>                 | YP_001333719.1                | 0.98                        | 0.98 | 0.40   | 0.96                  | 1.00                         | 0.42    | 0.42 | 0.42     | 1.00       | 0.42       | 1.00      | 0.42       |
| <i>oadB</i>                 | YP_001333720.1                | 1.00                        | 1.00 | 1.00   | 0.35                  | 1.00                         | 0.04    | 0.04 | 1.00     | 0.84       | 0.04       | 0.99      | 1.00       |
| <i>oadA</i>                 | YP_001333721.1                | 0.98                        | 0.98 | 0.88   | 0.43                  | 1.00                         | 0.04    | 0.05 | 0.99     | 0.52       | 0.04       | 0.99      | 0.98       |
| <i>oadG</i>                 | YP_001333722.1                | 0.95                        | 0.95 | 0.96   | 0.95                  | 1.00                         | 0.26    | 0.27 | 0.54     | 0.94       | 0.26       | 0.94      | 0.94       |
| <i>citS</i>                 | YP_001333723.1                | 0.99                        | 0.99 | 0.22   | 0.98                  | 1.00                         | 0.23    | 0.23 | 0.23     | 1.00       | 0.22       | 1.01      | 0.23       |
| <i>citC2</i>                | YP_001333724.1                | 0.96                        | 0.97 | 0.04   | 0.93                  | 1.00                         | 0.04    | 0.04 | 0.04     | 1.00       | 0.04       | 1.00      | 0.04       |
| <i>citD2</i>                | YP_001333725.1                | 0.92                        | 0.92 | 0.19   | 0.98                  | 1.00                         | 0.19    | 0.19 | 0.19     | 1.00       | 0.19       | 1.00      | 0.19       |
| <i>citE2</i>                | YP_001333726.1                | 1.00                        | 0.99 | 0.06   | 0.98                  | 1.00                         | 0.05    | 0.05 | 0.06     | 1.00       | 0.05       | 1.00      | 0.05       |
| <i>citF2</i>                | YP_001333727.1                | 0.98                        | 0.99 | 0.03   | 0.99                  | 1.00                         | 0.03    | 0.03 | 0.03     | 1.00       | 0.03       | 1.00      | 0.03       |
| <i>citG2</i>                | YP_001333728.1                | 0.98                        | 0.98 | 0.23   | 0.92                  | 1.00                         | 0.23    | 0.22 | 0.23     | 1.00       | 0.23       | 1.00      | 0.23       |
| <i>dapB</i>                 | YP_001333729.1                | 0.99                        | 0.99 | 0.99   | 0.98                  | 1.00                         | 0.99    | 1.00 | 0.81     | 0.85       | 0.99       | 1.00      | 1.00       |

<sup>a</sup>The BSR values were generated by TBLASTN with the amino acid sequences encoded by each gene compared to the publicly available genomes examined in this study. Ratios that were >1 due to differences in contig length are displayed as 1.

<sup>b</sup>The Accession Numbers of the amino acid sequences used are indicated.

<sup>c</sup>BSR values  $\geq 0.8$  are highlighted in yellow, while values between 0.4 and 0.8 are highlighted in green.

<sup>d</sup>Reference sequences for virulence-associated genes are those specified in Brisse et al. 2009
